# Supplementary material
Source: publisher site journal article supplement (https://www.spandidos-publications.com/8315/downloadSupplementary)
Supplement: Supplementary file 1 [file downloadSupplementary]

## Sheet: Table SV
Table SV. lncRNA targeting results.
lncRNA ID	Gene ID	P-value	lncRNA symbol	Symbol	GO component	GO function	GO process
ENST00000473832	ENSG00000001460	1.58x10⁻³	DGCR2-204	STPG1	GO:0005634//nucleus;GO:0005737//cytoplasm;GO:0005739//mitochondrion	GO:0003674//molecular_function	GO:0006915//apoptotic process;GO:0043065//positive regulation of apoptotic process;GO:1902110//positive regulation of mitochondrial membrane permeability involved in apoptotic process
ENST00000495388	ENSG00000001460	1.93x10⁻³	CTNND2-202	STPG1	GO:0005634//nucleus;GO:0005737//cytoplasm;GO:0005739//mitochondrion	GO:0003674//molecular_function	GO:0006915//apoptotic process;GO:0043065//positive regulation of apoptotic process;GO:1902110//positive regulation of mitochondrial membrane permeability involved in apoptotic process
ENST00000540207	ENSG00000001460	1.81x10⁻³	ADGRD1-209	STPG1	GO:0005634//nucleus;GO:0005737//cytoplasm;GO:0005739//mitochondrion	GO:0003674//molecular_function	GO:0006915//apoptotic process;GO:0043065//positive regulation of apoptotic process;GO:1902110//positive regulation of mitochondrial membrane permeability involved in apoptotic process
ENST00000672797	ENSG00000001460	3.10x10⁻³	AAAS-221	STPG1	GO:0005634//nucleus;GO:0005737//cytoplasm;GO:0005739//mitochondrion	GO:0003674//molecular_function	GO:0006915//apoptotic process;GO:0043065//positive regulation of apoptotic process;GO:1902110//positive regulation of mitochondrial membrane permeability involved in apoptotic process
ENST00000696185	ENSG00000001460	6.03x10⁻⁴	EXTL3-222	STPG1	GO:0005634//nucleus;GO:0005737//cytoplasm;GO:0005739//mitochondrion	GO:0003674//molecular_function	GO:0006915//apoptotic process;GO:0043065//positive regulation of apoptotic process;GO:1902110//positive regulation of mitochondrial membrane permeability involved in apoptotic process
MSTRG.5207.1	ENSG00000001460	1.93x10⁻³	-	STPG1	GO:0005634//nucleus;GO:0005737//cytoplasm;GO:0005739//mitochondrion	GO:0003674//molecular_function	GO:0006915//apoptotic process;GO:0043065//positive regulation of apoptotic process;GO:1902110//positive regulation of mitochondrial membrane permeability involved in apoptotic process
MSTRG.7693.1	ENSG00000001460	2.47x10⁻³	-	STPG1	GO:0005634//nucleus;GO:0005737//cytoplasm;GO:0005739//mitochondrion	GO:0003674//molecular_function	GO:0006915//apoptotic process;GO:0043065//positive regulation of apoptotic process;GO:1902110//positive regulation of mitochondrial membrane permeability involved in apoptotic process
ENST00000343528	ENSG00000001630	1.09x10⁻³	PDXK-203	CYP51A1	GO:0005783//endoplasmic reticulum;GO:0005789//endoplasmic reticulum membrane;GO:0016020//membrane;GO:0016021//integral component of membrane;GO:0043231//intracellular membrane-bounded organelle	GO:0004497//monooxygenase activity;GO:0005506//iron ion binding;GO:0008398//sterol 14-demethylase activity;GO:0016491//oxidoreductase activity;GO:0016705//oxidoreductase activity, acting on paired donors, with incorporation or reduction of molecular oxygen;GO:0020037//heme binding;GO:0046872//metal ion binding	GO:0006629//lipid metabolic process;GO:0006694//steroid biosynthetic process;GO:0006695//cholesterol biosynthetic process;GO:0008202//steroid metabolic process;GO:0008203//cholesterol metabolic process;GO:0016125//sterol metabolic process;GO:0016126//sterol biosynthetic process;GO:0042177//negative regulation of protein catabolic process;GO:0050709//negative regulation of protein secretion;GO:007…
ENST00000379053	ENSG00000001630	2.91x10⁻³	LINC00654-201	CYP51A1	GO:0005783//endoplasmic reticulum;GO:0005789//endoplasmic reticulum membrane;GO:0016020//membrane;GO:0016021//integral component of membrane;GO:0043231//intracellular membrane-bounded organelle	GO:0004497//monooxygenase activity;GO:0005506//iron ion binding;GO:0008398//sterol 14-demethylase activity;GO:0016491//oxidoreductase activity;GO:0016705//oxidoreductase activity, acting on paired donors, with incorporation or reduction of molecular oxygen;GO:0020037//heme binding;GO:0046872//metal ion binding	GO:0006629//lipid metabolic process;GO:0006694//steroid biosynthetic process;GO:0006695//cholesterol biosynthetic process;GO:0008202//steroid metabolic process;GO:0008203//cholesterol metabolic process;GO:0016125//sterol metabolic process;GO:0016126//sterol biosynthetic process;GO:0042177//negative regulation of protein catabolic process;GO:0050709//negative regulation of protein secretion;GO:007…
ENST00000391874	ENSG00000001630	5.44x10⁻⁴	ENAH-205	CYP51A1	GO:0005783//endoplasmic reticulum;GO:0005789//endoplasmic reticulum membrane;GO:0016020//membrane;GO:0016021//integral component of membrane;GO:0043231//intracellular membrane-bounded organelle	GO:0004497//monooxygenase activity;GO:0005506//iron ion binding;GO:0008398//sterol 14-demethylase activity;GO:0016491//oxidoreductase activity;GO:0016705//oxidoreductase activity, acting on paired donors, with incorporation or reduction of molecular oxygen;GO:0020037//heme binding;GO:0046872//metal ion binding	GO:0006629//lipid metabolic process;GO:0006694//steroid biosynthetic process;GO:0006695//cholesterol biosynthetic process;GO:0008202//steroid metabolic process;GO:0008203//cholesterol metabolic process;GO:0016125//sterol metabolic process;GO:0016126//sterol biosynthetic process;GO:0042177//negative regulation of protein catabolic process;GO:0050709//negative regulation of protein secretion;GO:007…
ENST00000414739	ENSG00000001630	1.18x10⁻³	CASTOR3-202	CYP51A1	GO:0005783//endoplasmic reticulum;GO:0005789//endoplasmic reticulum membrane;GO:0016020//membrane;GO:0016021//integral component of membrane;GO:0043231//intracellular membrane-bounded organelle	GO:0004497//monooxygenase activity;GO:0005506//iron ion binding;GO:0008398//sterol 14-demethylase activity;GO:0016491//oxidoreductase activity;GO:0016705//oxidoreductase activity, acting on paired donors, with incorporation or reduction of molecular oxygen;GO:0020037//heme binding;GO:0046872//metal ion binding	GO:0006629//lipid metabolic process;GO:0006694//steroid biosynthetic process;GO:0006695//cholesterol biosynthetic process;GO:0008202//steroid metabolic process;GO:0008203//cholesterol metabolic process;GO:0016125//sterol metabolic process;GO:0016126//sterol biosynthetic process;GO:0042177//negative regulation of protein catabolic process;GO:0050709//negative regulation of protein secretion;GO:007…
ENST00000423891	ENSG00000001630	7.06x10⁻⁴	JAG1-202	CYP51A1	GO:0005783//endoplasmic reticulum;GO:0005789//endoplasmic reticulum membrane;GO:0016020//membrane;GO:0016021//integral component of membrane;GO:0043231//intracellular membrane-bounded organelle	GO:0004497//monooxygenase activity;GO:0005506//iron ion binding;GO:0008398//sterol 14-demethylase activity;GO:0016491//oxidoreductase activity;GO:0016705//oxidoreductase activity, acting on paired donors, with incorporation or reduction of molecular oxygen;GO:0020037//heme binding;GO:0046872//metal ion binding	GO:0006629//lipid metabolic process;GO:0006694//steroid biosynthetic process;GO:0006695//cholesterol biosynthetic process;GO:0008202//steroid metabolic process;GO:0008203//cholesterol metabolic process;GO:0016125//sterol metabolic process;GO:0016126//sterol biosynthetic process;GO:0042177//negative regulation of protein catabolic process;GO:0050709//negative regulation of protein secretion;GO:007…
ENST00000455909	ENSG00000001630	6.17x10⁻⁵	FKBP9P1-202	CYP51A1	GO:0005783//endoplasmic reticulum;GO:0005789//endoplasmic reticulum membrane;GO:0016020//membrane;GO:0016021//integral component of membrane;GO:0043231//intracellular membrane-bounded organelle	GO:0004497//monooxygenase activity;GO:0005506//iron ion binding;GO:0008398//sterol 14-demethylase activity;GO:0016491//oxidoreductase activity;GO:0016705//oxidoreductase activity, acting on paired donors, with incorporation or reduction of molecular oxygen;GO:0020037//heme binding;GO:0046872//metal ion binding	GO:0006629//lipid metabolic process;GO:0006694//steroid biosynthetic process;GO:0006695//cholesterol biosynthetic process;GO:0008202//steroid metabolic process;GO:0008203//cholesterol metabolic process;GO:0016125//sterol metabolic process;GO:0016126//sterol biosynthetic process;GO:0042177//negative regulation of protein catabolic process;GO:0050709//negative regulation of protein secretion;GO:007…
ENST00000464481	ENSG00000001630	4.90x10⁻⁴	SPIRE1-208	CYP51A1	GO:0005783//endoplasmic reticulum;GO:0005789//endoplasmic reticulum membrane;GO:0016020//membrane;GO:0016021//integral component of membrane;GO:0043231//intracellular membrane-bounded organelle	GO:0004497//monooxygenase activity;GO:0005506//iron ion binding;GO:0008398//sterol 14-demethylase activity;GO:0016491//oxidoreductase activity;GO:0016705//oxidoreductase activity, acting on paired donors, with incorporation or reduction of molecular oxygen;GO:0020037//heme binding;GO:0046872//metal ion binding	GO:0006629//lipid metabolic process;GO:0006694//steroid biosynthetic process;GO:0006695//cholesterol biosynthetic process;GO:0008202//steroid metabolic process;GO:0008203//cholesterol metabolic process;GO:0016125//sterol metabolic process;GO:0016126//sterol biosynthetic process;GO:0042177//negative regulation of protein catabolic process;GO:0050709//negative regulation of protein secretion;GO:007…
ENST00000466496	ENSG00000001630	2.72x10⁻³	MTMR11-203	CYP51A1	GO:0005783//endoplasmic reticulum;GO:0005789//endoplasmic reticulum membrane;GO:0016020//membrane;GO:0016021//integral component of membrane;GO:0043231//intracellular membrane-bounded organelle	GO:0004497//monooxygenase activity;GO:0005506//iron ion binding;GO:0008398//sterol 14-demethylase activity;GO:0016491//oxidoreductase activity;GO:0016705//oxidoreductase activity, acting on paired donors, with incorporation or reduction of molecular oxygen;GO:0020037//heme binding;GO:0046872//metal ion binding	GO:0006629//lipid metabolic process;GO:0006694//steroid biosynthetic process;GO:0006695//cholesterol biosynthetic process;GO:0008202//steroid metabolic process;GO:0008203//cholesterol metabolic process;GO:0016125//sterol metabolic process;GO:0016126//sterol biosynthetic process;GO:0042177//negative regulation of protein catabolic process;GO:0050709//negative regulation of protein secretion;GO:007…
ENST00000473778	ENSG00000001630	2.25x10⁻³	AOPEP-213	CYP51A1	GO:0005783//endoplasmic reticulum;GO:0005789//endoplasmic reticulum membrane;GO:0016020//membrane;GO:0016021//integral component of membrane;GO:0043231//intracellular membrane-bounded organelle	GO:0004497//monooxygenase activity;GO:0005506//iron ion binding;GO:0008398//sterol 14-demethylase activity;GO:0016491//oxidoreductase activity;GO:0016705//oxidoreductase activity, acting on paired donors, with incorporation or reduction of molecular oxygen;GO:0020037//heme binding;GO:0046872//metal ion binding	GO:0006629//lipid metabolic process;GO:0006694//steroid biosynthetic process;GO:0006695//cholesterol biosynthetic process;GO:0008202//steroid metabolic process;GO:0008203//cholesterol metabolic process;GO:0016125//sterol metabolic process;GO:0016126//sterol biosynthetic process;GO:0042177//negative regulation of protein catabolic process;GO:0050709//negative regulation of protein secretion;GO:007…
ENST00000475181	ENSG00000001630	1.40x10⁻⁴	CCDC80-206	CYP51A1	GO:0005783//endoplasmic reticulum;GO:0005789//endoplasmic reticulum membrane;GO:0016020//membrane;GO:0016021//integral component of membrane;GO:0043231//intracellular membrane-bounded organelle	GO:0004497//monooxygenase activity;GO:0005506//iron ion binding;GO:0008398//sterol 14-demethylase activity;GO:0016491//oxidoreductase activity;GO:0016705//oxidoreductase activity, acting on paired donors, with incorporation or reduction of molecular oxygen;GO:0020037//heme binding;GO:0046872//metal ion binding	GO:0006629//lipid metabolic process;GO:0006694//steroid biosynthetic process;GO:0006695//cholesterol biosynthetic process;GO:0008202//steroid metabolic process;GO:0008203//cholesterol metabolic process;GO:0016125//sterol metabolic process;GO:0016126//sterol biosynthetic process;GO:0042177//negative regulation of protein catabolic process;GO:0050709//negative regulation of protein secretion;GO:007…
ENST00000476100	ENSG00000001630	2.63x10⁻³	AKR1C1-204	CYP51A1	GO:0005783//endoplasmic reticulum;GO:0005789//endoplasmic reticulum membrane;GO:0016020//membrane;GO:0016021//integral component of membrane;GO:0043231//intracellular membrane-bounded organelle	GO:0004497//monooxygenase activity;GO:0005506//iron ion binding;GO:0008398//sterol 14-demethylase activity;GO:0016491//oxidoreductase activity;GO:0016705//oxidoreductase activity, acting on paired donors, with incorporation or reduction of molecular oxygen;GO:0020037//heme binding;GO:0046872//metal ion binding	GO:0006629//lipid metabolic process;GO:0006694//steroid biosynthetic process;GO:0006695//cholesterol biosynthetic process;GO:0008202//steroid metabolic process;GO:0008203//cholesterol metabolic process;GO:0016125//sterol metabolic process;GO:0016126//sterol biosynthetic process;GO:0042177//negative regulation of protein catabolic process;GO:0050709//negative regulation of protein secretion;GO:007…
ENST00000477661	ENSG00000001630	1.32x10⁻⁴	AKR1C1-205	CYP51A1	GO:0005783//endoplasmic reticulum;GO:0005789//endoplasmic reticulum membrane;GO:0016020//membrane;GO:0016021//integral component of membrane;GO:0043231//intracellular membrane-bounded organelle	GO:0004497//monooxygenase activity;GO:0005506//iron ion binding;GO:0008398//sterol 14-demethylase activity;GO:0016491//oxidoreductase activity;GO:0016705//oxidoreductase activity, acting on paired donors, with incorporation or reduction of molecular oxygen;GO:0020037//heme binding;GO:0046872//metal ion binding	GO:0006629//lipid metabolic process;GO:0006694//steroid biosynthetic process;GO:0006695//cholesterol biosynthetic process;GO:0008202//steroid metabolic process;GO:0008203//cholesterol metabolic process;GO:0016125//sterol metabolic process;GO:0016126//sterol biosynthetic process;GO:0042177//negative regulation of protein catabolic process;GO:0050709//negative regulation of protein secretion;GO:007…
ENST00000479053	ENSG00000001630	1.76x10⁻³	RECK-203	CYP51A1	GO:0005783//endoplasmic reticulum;GO:0005789//endoplasmic reticulum membrane;GO:0016020//membrane;GO:0016021//integral component of membrane;GO:0043231//intracellular membrane-bounded organelle	GO:0004497//monooxygenase activity;GO:0005506//iron ion binding;GO:0008398//sterol 14-demethylase activity;GO:0016491//oxidoreductase activity;GO:0016705//oxidoreductase activity, acting on paired donors, with incorporation or reduction of molecular oxygen;GO:0020037//heme binding;GO:0046872//metal ion binding	GO:0006629//lipid metabolic process;GO:0006694//steroid biosynthetic process;GO:0006695//cholesterol biosynthetic process;GO:0008202//steroid metabolic process;GO:0008203//cholesterol metabolic process;GO:0016125//sterol metabolic process;GO:0016126//sterol biosynthetic process;GO:0042177//negative regulation of protein catabolic process;GO:0050709//negative regulation of protein secretion;GO:007…
ENST00000479516	ENSG00000001630	2.46x10⁻³	RNF8-205	CYP51A1	GO:0005783//endoplasmic reticulum;GO:0005789//endoplasmic reticulum membrane;GO:0016020//membrane;GO:0016021//integral component of membrane;GO:0043231//intracellular membrane-bounded organelle	GO:0004497//monooxygenase activity;GO:0005506//iron ion binding;GO:0008398//sterol 14-demethylase activity;GO:0016491//oxidoreductase activity;GO:0016705//oxidoreductase activity, acting on paired donors, with incorporation or reduction of molecular oxygen;GO:0020037//heme binding;GO:0046872//metal ion binding	GO:0006629//lipid metabolic process;GO:0006694//steroid biosynthetic process;GO:0006695//cholesterol biosynthetic process;GO:0008202//steroid metabolic process;GO:0008203//cholesterol metabolic process;GO:0016125//sterol metabolic process;GO:0016126//sterol biosynthetic process;GO:0042177//negative regulation of protein catabolic process;GO:0050709//negative regulation of protein secretion;GO:007…
ENST00000480992	ENSG00000001630	9.11x10⁻⁴	NOP56-213	CYP51A1	GO:0005783//endoplasmic reticulum;GO:0005789//endoplasmic reticulum membrane;GO:0016020//membrane;GO:0016021//integral component of membrane;GO:0043231//intracellular membrane-bounded organelle	GO:0004497//monooxygenase activity;GO:0005506//iron ion binding;GO:0008398//sterol 14-demethylase activity;GO:0016491//oxidoreductase activity;GO:0016705//oxidoreductase activity, acting on paired donors, with incorporation or reduction of molecular oxygen;GO:0020037//heme binding;GO:0046872//metal ion binding	GO:0006629//lipid metabolic process;GO:0006694//steroid biosynthetic process;GO:0006695//cholesterol biosynthetic process;GO:0008202//steroid metabolic process;GO:0008203//cholesterol metabolic process;GO:0016125//sterol metabolic process;GO:0016126//sterol biosynthetic process;GO:0042177//negative regulation of protein catabolic process;GO:0050709//negative regulation of protein secretion;GO:007…
ENST00000481527	ENSG00000001630	3.15x10⁻⁴	ACOX2-211	CYP51A1	GO:0005783//endoplasmic reticulum;GO:0005789//endoplasmic reticulum membrane;GO:0016020//membrane;GO:0016021//integral component of membrane;GO:0043231//intracellular membrane-bounded organelle	GO:0004497//monooxygenase activity;GO:0005506//iron ion binding;GO:0008398//sterol 14-demethylase activity;GO:0016491//oxidoreductase activity;GO:0016705//oxidoreductase activity, acting on paired donors, with incorporation or reduction of molecular oxygen;GO:0020037//heme binding;GO:0046872//metal ion binding	GO:0006629//lipid metabolic process;GO:0006694//steroid biosynthetic process;GO:0006695//cholesterol biosynthetic process;GO:0008202//steroid metabolic process;GO:0008203//cholesterol metabolic process;GO:0016125//sterol metabolic process;GO:0016126//sterol biosynthetic process;GO:0042177//negative regulation of protein catabolic process;GO:0050709//negative regulation of protein secretion;GO:007…
ENST00000482337	ENSG00000001630	2.31x10⁻⁴	KHDC4-208	CYP51A1	GO:0005783//endoplasmic reticulum;GO:0005789//endoplasmic reticulum membrane;GO:0016020//membrane;GO:0016021//integral component of membrane;GO:0043231//intracellular membrane-bounded organelle	GO:0004497//monooxygenase activity;GO:0005506//iron ion binding;GO:0008398//sterol 14-demethylase activity;GO:0016491//oxidoreductase activity;GO:0016705//oxidoreductase activity, acting on paired donors, with incorporation or reduction of molecular oxygen;GO:0020037//heme binding;GO:0046872//metal ion binding	GO:0006629//lipid metabolic process;GO:0006694//steroid biosynthetic process;GO:0006695//cholesterol biosynthetic process;GO:0008202//steroid metabolic process;GO:0008203//cholesterol metabolic process;GO:0016125//sterol metabolic process;GO:0016126//sterol biosynthetic process;GO:0042177//negative regulation of protein catabolic process;GO:0050709//negative regulation of protein secretion;GO:007…
ENST00000484270	ENSG00000001630	2.62x10⁻³	KHDRBS1-203	CYP51A1	GO:0005783//endoplasmic reticulum;GO:0005789//endoplasmic reticulum membrane;GO:0016020//membrane;GO:0016021//integral component of membrane;GO:0043231//intracellular membrane-bounded organelle	GO:0004497//monooxygenase activity;GO:0005506//iron ion binding;GO:0008398//sterol 14-demethylase activity;GO:0016491//oxidoreductase activity;GO:0016705//oxidoreductase activity, acting on paired donors, with incorporation or reduction of molecular oxygen;GO:0020037//heme binding;GO:0046872//metal ion binding	GO:0006629//lipid metabolic process;GO:0006694//steroid biosynthetic process;GO:0006695//cholesterol biosynthetic process;GO:0008202//steroid metabolic process;GO:0008203//cholesterol metabolic process;GO:0016125//sterol metabolic process;GO:0016126//sterol biosynthetic process;GO:0042177//negative regulation of protein catabolic process;GO:0050709//negative regulation of protein secretion;GO:007…
ENST00000485483	ENSG00000001630	3.11x10⁻³	MAGED2-209	CYP51A1	GO:0005783//endoplasmic reticulum;GO:0005789//endoplasmic reticulum membrane;GO:0016020//membrane;GO:0016021//integral component of membrane;GO:0043231//intracellular membrane-bounded organelle	GO:0004497//monooxygenase activity;GO:0005506//iron ion binding;GO:0008398//sterol 14-demethylase activity;GO:0016491//oxidoreductase activity;GO:0016705//oxidoreductase activity, acting on paired donors, with incorporation or reduction of molecular oxygen;GO:0020037//heme binding;GO:0046872//metal ion binding	GO:0006629//lipid metabolic process;GO:0006694//steroid biosynthetic process;GO:0006695//cholesterol biosynthetic process;GO:0008202//steroid metabolic process;GO:0008203//cholesterol metabolic process;GO:0016125//sterol metabolic process;GO:0016126//sterol biosynthetic process;GO:0042177//negative regulation of protein catabolic process;GO:0050709//negative regulation of protein secretion;GO:007…
ENST00000487278	ENSG00000001630	4.00x10⁻⁴	ZSWIM8-210	CYP51A1	GO:0005783//endoplasmic reticulum;GO:0005789//endoplasmic reticulum membrane;GO:0016020//membrane;GO:0016021//integral component of membrane;GO:0043231//intracellular membrane-bounded organelle	GO:0004497//monooxygenase activity;GO:0005506//iron ion binding;GO:0008398//sterol 14-demethylase activity;GO:0016491//oxidoreductase activity;GO:0016705//oxidoreductase activity, acting on paired donors, with incorporation or reduction of molecular oxygen;GO:0020037//heme binding;GO:0046872//metal ion binding	GO:0006629//lipid metabolic process;GO:0006694//steroid biosynthetic process;GO:0006695//cholesterol biosynthetic process;GO:0008202//steroid metabolic process;GO:0008203//cholesterol metabolic process;GO:0016125//sterol metabolic process;GO:0016126//sterol biosynthetic process;GO:0042177//negative regulation of protein catabolic process;GO:0050709//negative regulation of protein secretion;GO:007…
ENST00000491958	ENSG00000001630	3.12x10⁻³	SELENOM-208	CYP51A1	GO:0005783//endoplasmic reticulum;GO:0005789//endoplasmic reticulum membrane;GO:0016020//membrane;GO:0016021//integral component of membrane;GO:0043231//intracellular membrane-bounded organelle	GO:0004497//monooxygenase activity;GO:0005506//iron ion binding;GO:0008398//sterol 14-demethylase activity;GO:0016491//oxidoreductase activity;GO:0016705//oxidoreductase activity, acting on paired donors, with incorporation or reduction of molecular oxygen;GO:0020037//heme binding;GO:0046872//metal ion binding	GO:0006629//lipid metabolic process;GO:0006694//steroid biosynthetic process;GO:0006695//cholesterol biosynthetic process;GO:0008202//steroid metabolic process;GO:0008203//cholesterol metabolic process;GO:0016125//sterol metabolic process;GO:0016126//sterol biosynthetic process;GO:0042177//negative regulation of protein catabolic process;GO:0050709//negative regulation of protein secretion;GO:007…
ENST00000492135	ENSG00000001630	1.36x10⁻⁴	NOP56-216	CYP51A1	GO:0005783//endoplasmic reticulum;GO:0005789//endoplasmic reticulum membrane;GO:0016020//membrane;GO:0016021//integral component of membrane;GO:0043231//intracellular membrane-bounded organelle	GO:0004497//monooxygenase activity;GO:0005506//iron ion binding;GO:0008398//sterol 14-demethylase activity;GO:0016491//oxidoreductase activity;GO:0016705//oxidoreductase activity, acting on paired donors, with incorporation or reduction of molecular oxygen;GO:0020037//heme binding;GO:0046872//metal ion binding	GO:0006629//lipid metabolic process;GO:0006694//steroid biosynthetic process;GO:0006695//cholesterol biosynthetic process;GO:0008202//steroid metabolic process;GO:0008203//cholesterol metabolic process;GO:0016125//sterol metabolic process;GO:0016126//sterol biosynthetic process;GO:0042177//negative regulation of protein catabolic process;GO:0050709//negative regulation of protein secretion;GO:007…
ENST00000495714	ENSG00000001630	3.20x10⁻³	ANLN-213	CYP51A1	GO:0005783//endoplasmic reticulum;GO:0005789//endoplasmic reticulum membrane;GO:0016020//membrane;GO:0016021//integral component of membrane;GO:0043231//intracellular membrane-bounded organelle	GO:0004497//monooxygenase activity;GO:0005506//iron ion binding;GO:0008398//sterol 14-demethylase activity;GO:0016491//oxidoreductase activity;GO:0016705//oxidoreductase activity, acting on paired donors, with incorporation or reduction of molecular oxygen;GO:0020037//heme binding;GO:0046872//metal ion binding	GO:0006629//lipid metabolic process;GO:0006694//steroid biosynthetic process;GO:0006695//cholesterol biosynthetic process;GO:0008202//steroid metabolic process;GO:0008203//cholesterol metabolic process;GO:0016125//sterol metabolic process;GO:0016126//sterol biosynthetic process;GO:0042177//negative regulation of protein catabolic process;GO:0050709//negative regulation of protein secretion;GO:007…
ENST00000495841	ENSG00000001630	5.37x10⁻⁴	CAV2-214	CYP51A1	GO:0005783//endoplasmic reticulum;GO:0005789//endoplasmic reticulum membrane;GO:0016020//membrane;GO:0016021//integral component of membrane;GO:0043231//intracellular membrane-bounded organelle	GO:0004497//monooxygenase activity;GO:0005506//iron ion binding;GO:0008398//sterol 14-demethylase activity;GO:0016491//oxidoreductase activity;GO:0016705//oxidoreductase activity, acting on paired donors, with incorporation or reduction of molecular oxygen;GO:0020037//heme binding;GO:0046872//metal ion binding	GO:0006629//lipid metabolic process;GO:0006694//steroid biosynthetic process;GO:0006695//cholesterol biosynthetic process;GO:0008202//steroid metabolic process;GO:0008203//cholesterol metabolic process;GO:0016125//sterol metabolic process;GO:0016126//sterol biosynthetic process;GO:0042177//negative regulation of protein catabolic process;GO:0050709//negative regulation of protein secretion;GO:007…
ENST00000496775	ENSG00000001630	2.55x10⁻³	NOP56-218	CYP51A1	GO:0005783//endoplasmic reticulum;GO:0005789//endoplasmic reticulum membrane;GO:0016020//membrane;GO:0016021//integral component of membrane;GO:0043231//intracellular membrane-bounded organelle	GO:0004497//monooxygenase activity;GO:0005506//iron ion binding;GO:0008398//sterol 14-demethylase activity;GO:0016491//oxidoreductase activity;GO:0016705//oxidoreductase activity, acting on paired donors, with incorporation or reduction of molecular oxygen;GO:0020037//heme binding;GO:0046872//metal ion binding	GO:0006629//lipid metabolic process;GO:0006694//steroid biosynthetic process;GO:0006695//cholesterol biosynthetic process;GO:0008202//steroid metabolic process;GO:0008203//cholesterol metabolic process;GO:0016125//sterol metabolic process;GO:0016126//sterol biosynthetic process;GO:0042177//negative regulation of protein catabolic process;GO:0050709//negative regulation of protein secretion;GO:007…
ENST00000496857	ENSG00000001630	3.55x10⁻³	EHBP1-220	CYP51A1	GO:0005783//endoplasmic reticulum;GO:0005789//endoplasmic reticulum membrane;GO:0016020//membrane;GO:0016021//integral component of membrane;GO:0043231//intracellular membrane-bounded organelle	GO:0004497//monooxygenase activity;GO:0005506//iron ion binding;GO:0008398//sterol 14-demethylase activity;GO:0016491//oxidoreductase activity;GO:0016705//oxidoreductase activity, acting on paired donors, with incorporation or reduction of molecular oxygen;GO:0020037//heme binding;GO:0046872//metal ion binding	GO:0006629//lipid metabolic process;GO:0006694//steroid biosynthetic process;GO:0006695//cholesterol biosynthetic process;GO:0008202//steroid metabolic process;GO:0008203//cholesterol metabolic process;GO:0016125//sterol metabolic process;GO:0016126//sterol biosynthetic process;GO:0042177//negative regulation of protein catabolic process;GO:0050709//negative regulation of protein secretion;GO:007…
ENST00000497322	ENSG00000001630	5.74x10⁻⁴	RPL12-203	CYP51A1	GO:0005783//endoplasmic reticulum;GO:0005789//endoplasmic reticulum membrane;GO:0016020//membrane;GO:0016021//integral component of membrane;GO:0043231//intracellular membrane-bounded organelle	GO:0004497//monooxygenase activity;GO:0005506//iron ion binding;GO:0008398//sterol 14-demethylase activity;GO:0016491//oxidoreductase activity;GO:0016705//oxidoreductase activity, acting on paired donors, with incorporation or reduction of molecular oxygen;GO:0020037//heme binding;GO:0046872//metal ion binding	GO:0006629//lipid metabolic process;GO:0006694//steroid biosynthetic process;GO:0006695//cholesterol biosynthetic process;GO:0008202//steroid metabolic process;GO:0008203//cholesterol metabolic process;GO:0016125//sterol metabolic process;GO:0016126//sterol biosynthetic process;GO:0042177//negative regulation of protein catabolic process;GO:0050709//negative regulation of protein secretion;GO:007…
ENST00000502576	ENSG00000001630	1.94x10⁻³	HSD17B11-202	CYP51A1	GO:0005783//endoplasmic reticulum;GO:0005789//endoplasmic reticulum membrane;GO:0016020//membrane;GO:0016021//integral component of membrane;GO:0043231//intracellular membrane-bounded organelle	GO:0004497//monooxygenase activity;GO:0005506//iron ion binding;GO:0008398//sterol 14-demethylase activity;GO:0016491//oxidoreductase activity;GO:0016705//oxidoreductase activity, acting on paired donors, with incorporation or reduction of molecular oxygen;GO:0020037//heme binding;GO:0046872//metal ion binding	GO:0006629//lipid metabolic process;GO:0006694//steroid biosynthetic process;GO:0006695//cholesterol biosynthetic process;GO:0008202//steroid metabolic process;GO:0008203//cholesterol metabolic process;GO:0016125//sterol metabolic process;GO:0016126//sterol biosynthetic process;GO:0042177//negative regulation of protein catabolic process;GO:0050709//negative regulation of protein secretion;GO:007…
ENST00000514343	ENSG00000001630	3.13x10⁻³	PTGER4-205	CYP51A1	GO:0005783//endoplasmic reticulum;GO:0005789//endoplasmic reticulum membrane;GO:0016020//membrane;GO:0016021//integral component of membrane;GO:0043231//intracellular membrane-bounded organelle	GO:0004497//monooxygenase activity;GO:0005506//iron ion binding;GO:0008398//sterol 14-demethylase activity;GO:0016491//oxidoreductase activity;GO:0016705//oxidoreductase activity, acting on paired donors, with incorporation or reduction of molecular oxygen;GO:0020037//heme binding;GO:0046872//metal ion binding	GO:0006629//lipid metabolic process;GO:0006694//steroid biosynthetic process;GO:0006695//cholesterol biosynthetic process;GO:0008202//steroid metabolic process;GO:0008203//cholesterol metabolic process;GO:0016125//sterol metabolic process;GO:0016126//sterol biosynthetic process;GO:0042177//negative regulation of protein catabolic process;GO:0050709//negative regulation of protein secretion;GO:007…
ENST00000515225	ENSG00000001630	3.35x10⁻³	DLC1-212	CYP51A1	GO:0005783//endoplasmic reticulum;GO:0005789//endoplasmic reticulum membrane;GO:0016020//membrane;GO:0016021//integral component of membrane;GO:0043231//intracellular membrane-bounded organelle	GO:0004497//monooxygenase activity;GO:0005506//iron ion binding;GO:0008398//sterol 14-demethylase activity;GO:0016491//oxidoreductase activity;GO:0016705//oxidoreductase activity, acting on paired donors, with incorporation or reduction of molecular oxygen;GO:0020037//heme binding;GO:0046872//metal ion binding	GO:0006629//lipid metabolic process;GO:0006694//steroid biosynthetic process;GO:0006695//cholesterol biosynthetic process;GO:0008202//steroid metabolic process;GO:0008203//cholesterol metabolic process;GO:0016125//sterol metabolic process;GO:0016126//sterol biosynthetic process;GO:0042177//negative regulation of protein catabolic process;GO:0050709//negative regulation of protein secretion;GO:007…
ENST00000518815	ENSG00000001630	2.82x10⁻³	MTCL1-206	CYP51A1	GO:0005783//endoplasmic reticulum;GO:0005789//endoplasmic reticulum membrane;GO:0016020//membrane;GO:0016021//integral component of membrane;GO:0043231//intracellular membrane-bounded organelle	GO:0004497//monooxygenase activity;GO:0005506//iron ion binding;GO:0008398//sterol 14-demethylase activity;GO:0016491//oxidoreductase activity;GO:0016705//oxidoreductase activity, acting on paired donors, with incorporation or reduction of molecular oxygen;GO:0020037//heme binding;GO:0046872//metal ion binding	GO:0006629//lipid metabolic process;GO:0006694//steroid biosynthetic process;GO:0006695//cholesterol biosynthetic process;GO:0008202//steroid metabolic process;GO:0008203//cholesterol metabolic process;GO:0016125//sterol metabolic process;GO:0016126//sterol biosynthetic process;GO:0042177//negative regulation of protein catabolic process;GO:0050709//negative regulation of protein secretion;GO:007…
ENST00000519571	ENSG00000001630	3.85x10⁻⁵	GALNT10-207	CYP51A1	GO:0005783//endoplasmic reticulum;GO:0005789//endoplasmic reticulum membrane;GO:0016020//membrane;GO:0016021//integral component of membrane;GO:0043231//intracellular membrane-bounded organelle	GO:0004497//monooxygenase activity;GO:0005506//iron ion binding;GO:0008398//sterol 14-demethylase activity;GO:0016491//oxidoreductase activity;GO:0016705//oxidoreductase activity, acting on paired donors, with incorporation or reduction of molecular oxygen;GO:0020037//heme binding;GO:0046872//metal ion binding	GO:0006629//lipid metabolic process;GO:0006694//steroid biosynthetic process;GO:0006695//cholesterol biosynthetic process;GO:0008202//steroid metabolic process;GO:0008203//cholesterol metabolic process;GO:0016125//sterol metabolic process;GO:0016126//sterol biosynthetic process;GO:0042177//negative regulation of protein catabolic process;GO:0050709//negative regulation of protein secretion;GO:007…
ENST00000519691	ENSG00000001630	3.20x10⁻³	-	CYP51A1	GO:0005783//endoplasmic reticulum;GO:0005789//endoplasmic reticulum membrane;GO:0016020//membrane;GO:0016021//integral component of membrane;GO:0043231//intracellular membrane-bounded organelle	GO:0004497//monooxygenase activity;GO:0005506//iron ion binding;GO:0008398//sterol 14-demethylase activity;GO:0016491//oxidoreductase activity;GO:0016705//oxidoreductase activity, acting on paired donors, with incorporation or reduction of molecular oxygen;GO:0020037//heme binding;GO:0046872//metal ion binding	GO:0006629//lipid metabolic process;GO:0006694//steroid biosynthetic process;GO:0006695//cholesterol biosynthetic process;GO:0008202//steroid metabolic process;GO:0008203//cholesterol metabolic process;GO:0016125//sterol metabolic process;GO:0016126//sterol biosynthetic process;GO:0042177//negative regulation of protein catabolic process;GO:0050709//negative regulation of protein secretion;GO:007…
ENST00000544307	ENSG00000001630	3.87x10⁻⁴	PDE3A-203	CYP51A1	GO:0005783//endoplasmic reticulum;GO:0005789//endoplasmic reticulum membrane;GO:0016020//membrane;GO:0016021//integral component of membrane;GO:0043231//intracellular membrane-bounded organelle	GO:0004497//monooxygenase activity;GO:0005506//iron ion binding;GO:0008398//sterol 14-demethylase activity;GO:0016491//oxidoreductase activity;GO:0016705//oxidoreductase activity, acting on paired donors, with incorporation or reduction of molecular oxygen;GO:0020037//heme binding;GO:0046872//metal ion binding	GO:0006629//lipid metabolic process;GO:0006694//steroid biosynthetic process;GO:0006695//cholesterol biosynthetic process;GO:0008202//steroid metabolic process;GO:0008203//cholesterol metabolic process;GO:0016125//sterol metabolic process;GO:0016126//sterol biosynthetic process;GO:0042177//negative regulation of protein catabolic process;GO:0050709//negative regulation of protein secretion;GO:007…
ENST00000548071	ENSG00000001630	2.73x10⁻³	LUM-203	CYP51A1	GO:0005783//endoplasmic reticulum;GO:0005789//endoplasmic reticulum membrane;GO:0016020//membrane;GO:0016021//integral component of membrane;GO:0043231//intracellular membrane-bounded organelle	GO:0004497//monooxygenase activity;GO:0005506//iron ion binding;GO:0008398//sterol 14-demethylase activity;GO:0016491//oxidoreductase activity;GO:0016705//oxidoreductase activity, acting on paired donors, with incorporation or reduction of molecular oxygen;GO:0020037//heme binding;GO:0046872//metal ion binding	GO:0006629//lipid metabolic process;GO:0006694//steroid biosynthetic process;GO:0006695//cholesterol biosynthetic process;GO:0008202//steroid metabolic process;GO:0008203//cholesterol metabolic process;GO:0016125//sterol metabolic process;GO:0016126//sterol biosynthetic process;GO:0042177//negative regulation of protein catabolic process;GO:0050709//negative regulation of protein secretion;GO:007…
ENST00000551988	ENSG00000001630	1.16x10⁻³	PAH-213	CYP51A1	GO:0005783//endoplasmic reticulum;GO:0005789//endoplasmic reticulum membrane;GO:0016020//membrane;GO:0016021//integral component of membrane;GO:0043231//intracellular membrane-bounded organelle	GO:0004497//monooxygenase activity;GO:0005506//iron ion binding;GO:0008398//sterol 14-demethylase activity;GO:0016491//oxidoreductase activity;GO:0016705//oxidoreductase activity, acting on paired donors, with incorporation or reduction of molecular oxygen;GO:0020037//heme binding;GO:0046872//metal ion binding	GO:0006629//lipid metabolic process;GO:0006694//steroid biosynthetic process;GO:0006695//cholesterol biosynthetic process;GO:0008202//steroid metabolic process;GO:0008203//cholesterol metabolic process;GO:0016125//sterol metabolic process;GO:0016126//sterol biosynthetic process;GO:0042177//negative regulation of protein catabolic process;GO:0050709//negative regulation of protein secretion;GO:007…
ENST00000553596	ENSG00000001630	3.52x10⁻⁴	ARHGAP5-AS1-201	CYP51A1	GO:0005783//endoplasmic reticulum;GO:0005789//endoplasmic reticulum membrane;GO:0016020//membrane;GO:0016021//integral component of membrane;GO:0043231//intracellular membrane-bounded organelle	GO:0004497//monooxygenase activity;GO:0005506//iron ion binding;GO:0008398//sterol 14-demethylase activity;GO:0016491//oxidoreductase activity;GO:0016705//oxidoreductase activity, acting on paired donors, with incorporation or reduction of molecular oxygen;GO:0020037//heme binding;GO:0046872//metal ion binding	GO:0006629//lipid metabolic process;GO:0006694//steroid biosynthetic process;GO:0006695//cholesterol biosynthetic process;GO:0008202//steroid metabolic process;GO:0008203//cholesterol metabolic process;GO:0016125//sterol metabolic process;GO:0016126//sterol biosynthetic process;GO:0042177//negative regulation of protein catabolic process;GO:0050709//negative regulation of protein secretion;GO:007…
ENST00000554295	ENSG00000001630	2.61x10⁻³	SLC9A7P1-201	CYP51A1	GO:0005783//endoplasmic reticulum;GO:0005789//endoplasmic reticulum membrane;GO:0016020//membrane;GO:0016021//integral component of membrane;GO:0043231//intracellular membrane-bounded organelle	GO:0004497//monooxygenase activity;GO:0005506//iron ion binding;GO:0008398//sterol 14-demethylase activity;GO:0016491//oxidoreductase activity;GO:0016705//oxidoreductase activity, acting on paired donors, with incorporation or reduction of molecular oxygen;GO:0020037//heme binding;GO:0046872//metal ion binding	GO:0006629//lipid metabolic process;GO:0006694//steroid biosynthetic process;GO:0006695//cholesterol biosynthetic process;GO:0008202//steroid metabolic process;GO:0008203//cholesterol metabolic process;GO:0016125//sterol metabolic process;GO:0016126//sterol biosynthetic process;GO:0042177//negative regulation of protein catabolic process;GO:0050709//negative regulation of protein secretion;GO:007…
ENST00000556252	ENSG00000001630	3.30x10⁻³	OSGEP-211	CYP51A1	GO:0005783//endoplasmic reticulum;GO:0005789//endoplasmic reticulum membrane;GO:0016020//membrane;GO:0016021//integral component of membrane;GO:0043231//intracellular membrane-bounded organelle	GO:0004497//monooxygenase activity;GO:0005506//iron ion binding;GO:0008398//sterol 14-demethylase activity;GO:0016491//oxidoreductase activity;GO:0016705//oxidoreductase activity, acting on paired donors, with incorporation or reduction of molecular oxygen;GO:0020037//heme binding;GO:0046872//metal ion binding	GO:0006629//lipid metabolic process;GO:0006694//steroid biosynthetic process;GO:0006695//cholesterol biosynthetic process;GO:0008202//steroid metabolic process;GO:0008203//cholesterol metabolic process;GO:0016125//sterol metabolic process;GO:0016126//sterol biosynthetic process;GO:0042177//negative regulation of protein catabolic process;GO:0050709//negative regulation of protein secretion;GO:007…
ENST00000577038	ENSG00000001630	1.48x10⁻⁴	MMD-203	CYP51A1	GO:0005783//endoplasmic reticulum;GO:0005789//endoplasmic reticulum membrane;GO:0016020//membrane;GO:0016021//integral component of membrane;GO:0043231//intracellular membrane-bounded organelle	GO:0004497//monooxygenase activity;GO:0005506//iron ion binding;GO:0008398//sterol 14-demethylase activity;GO:0016491//oxidoreductase activity;GO:0016705//oxidoreductase activity, acting on paired donors, with incorporation or reduction of molecular oxygen;GO:0020037//heme binding;GO:0046872//metal ion binding	GO:0006629//lipid metabolic process;GO:0006694//steroid biosynthetic process;GO:0006695//cholesterol biosynthetic process;GO:0008202//steroid metabolic process;GO:0008203//cholesterol metabolic process;GO:0016125//sterol metabolic process;GO:0016126//sterol biosynthetic process;GO:0042177//negative regulation of protein catabolic process;GO:0050709//negative regulation of protein secretion;GO:007…
ENST00000590440	ENSG00000001630	3.53x10⁻⁴	ADAMTSL5-208	CYP51A1	GO:0005783//endoplasmic reticulum;GO:0005789//endoplasmic reticulum membrane;GO:0016020//membrane;GO:0016021//integral component of membrane;GO:0043231//intracellular membrane-bounded organelle	GO:0004497//monooxygenase activity;GO:0005506//iron ion binding;GO:0008398//sterol 14-demethylase activity;GO:0016491//oxidoreductase activity;GO:0016705//oxidoreductase activity, acting on paired donors, with incorporation or reduction of molecular oxygen;GO:0020037//heme binding;GO:0046872//metal ion binding	GO:0006629//lipid metabolic process;GO:0006694//steroid biosynthetic process;GO:0006695//cholesterol biosynthetic process;GO:0008202//steroid metabolic process;GO:0008203//cholesterol metabolic process;GO:0016125//sterol metabolic process;GO:0016126//sterol biosynthetic process;GO:0042177//negative regulation of protein catabolic process;GO:0050709//negative regulation of protein secretion;GO:007…
ENST00000606242	ENSG00000001630	1.60x10⁻³	LINC01836-202	CYP51A1	GO:0005783//endoplasmic reticulum;GO:0005789//endoplasmic reticulum membrane;GO:0016020//membrane;GO:0016021//integral component of membrane;GO:0043231//intracellular membrane-bounded organelle	GO:0004497//monooxygenase activity;GO:0005506//iron ion binding;GO:0008398//sterol 14-demethylase activity;GO:0016491//oxidoreductase activity;GO:0016705//oxidoreductase activity, acting on paired donors, with incorporation or reduction of molecular oxygen;GO:0020037//heme binding;GO:0046872//metal ion binding	GO:0006629//lipid metabolic process;GO:0006694//steroid biosynthetic process;GO:0006695//cholesterol biosynthetic process;GO:0008202//steroid metabolic process;GO:0008203//cholesterol metabolic process;GO:0016125//sterol metabolic process;GO:0016126//sterol biosynthetic process;GO:0042177//negative regulation of protein catabolic process;GO:0050709//negative regulation of protein secretion;GO:007…
ENST00000608477	ENSG00000001630	2.95x10⁻³	-	CYP51A1	GO:0005783//endoplasmic reticulum;GO:0005789//endoplasmic reticulum membrane;GO:0016020//membrane;GO:0016021//integral component of membrane;GO:0043231//intracellular membrane-bounded organelle	GO:0004497//monooxygenase activity;GO:0005506//iron ion binding;GO:0008398//sterol 14-demethylase activity;GO:0016491//oxidoreductase activity;GO:0016705//oxidoreductase activity, acting on paired donors, with incorporation or reduction of molecular oxygen;GO:0020037//heme binding;GO:0046872//metal ion binding	GO:0006629//lipid metabolic process;GO:0006694//steroid biosynthetic process;GO:0006695//cholesterol biosynthetic process;GO:0008202//steroid metabolic process;GO:0008203//cholesterol metabolic process;GO:0016125//sterol metabolic process;GO:0016126//sterol biosynthetic process;GO:0042177//negative regulation of protein catabolic process;GO:0050709//negative regulation of protein secretion;GO:007…
ENST00000616106	ENSG00000001630	3.28x10⁻³	-	CYP51A1	GO:0005783//endoplasmic reticulum;GO:0005789//endoplasmic reticulum membrane;GO:0016020//membrane;GO:0016021//integral component of membrane;GO:0043231//intracellular membrane-bounded organelle	GO:0004497//monooxygenase activity;GO:0005506//iron ion binding;GO:0008398//sterol 14-demethylase activity;GO:0016491//oxidoreductase activity;GO:0016705//oxidoreductase activity, acting on paired donors, with incorporation or reduction of molecular oxygen;GO:0020037//heme binding;GO:0046872//metal ion binding	GO:0006629//lipid metabolic process;GO:0006694//steroid biosynthetic process;GO:0006695//cholesterol biosynthetic process;GO:0008202//steroid metabolic process;GO:0008203//cholesterol metabolic process;GO:0016125//sterol metabolic process;GO:0016126//sterol biosynthetic process;GO:0042177//negative regulation of protein catabolic process;GO:0050709//negative regulation of protein secretion;GO:007…
ENST00000631190	ENSG00000001630	6.70x10⁻⁴	LINC00294-201	CYP51A1	GO:0005783//endoplasmic reticulum;GO:0005789//endoplasmic reticulum membrane;GO:0016020//membrane;GO:0016021//integral component of membrane;GO:0043231//intracellular membrane-bounded organelle	GO:0004497//monooxygenase activity;GO:0005506//iron ion binding;GO:0008398//sterol 14-demethylase activity;GO:0016491//oxidoreductase activity;GO:0016705//oxidoreductase activity, acting on paired donors, with incorporation or reduction of molecular oxygen;GO:0020037//heme binding;GO:0046872//metal ion binding	GO:0006629//lipid metabolic process;GO:0006694//steroid biosynthetic process;GO:0006695//cholesterol biosynthetic process;GO:0008202//steroid metabolic process;GO:0008203//cholesterol metabolic process;GO:0016125//sterol metabolic process;GO:0016126//sterol biosynthetic process;GO:0042177//negative regulation of protein catabolic process;GO:0050709//negative regulation of protein secretion;GO:007…
ENST00000643920	ENSG00000001630	1.45x10⁻³	TUG1-215	CYP51A1	GO:0005783//endoplasmic reticulum;GO:0005789//endoplasmic reticulum membrane;GO:0016020//membrane;GO:0016021//integral component of membrane;GO:0043231//intracellular membrane-bounded organelle	GO:0004497//monooxygenase activity;GO:0005506//iron ion binding;GO:0008398//sterol 14-demethylase activity;GO:0016491//oxidoreductase activity;GO:0016705//oxidoreductase activity, acting on paired donors, with incorporation or reduction of molecular oxygen;GO:0020037//heme binding;GO:0046872//metal ion binding	GO:0006629//lipid metabolic process;GO:0006694//steroid biosynthetic process;GO:0006695//cholesterol biosynthetic process;GO:0008202//steroid metabolic process;GO:0008203//cholesterol metabolic process;GO:0016125//sterol metabolic process;GO:0016126//sterol biosynthetic process;GO:0042177//negative regulation of protein catabolic process;GO:0050709//negative regulation of protein secretion;GO:007…
ENST00000644505	ENSG00000001630	2.67x10⁻³	MICAL2-232	CYP51A1	GO:0005783//endoplasmic reticulum;GO:0005789//endoplasmic reticulum membrane;GO:0016020//membrane;GO:0016021//integral component of membrane;GO:0043231//intracellular membrane-bounded organelle	GO:0004497//monooxygenase activity;GO:0005506//iron ion binding;GO:0008398//sterol 14-demethylase activity;GO:0016491//oxidoreductase activity;GO:0016705//oxidoreductase activity, acting on paired donors, with incorporation or reduction of molecular oxygen;GO:0020037//heme binding;GO:0046872//metal ion binding	GO:0006629//lipid metabolic process;GO:0006694//steroid biosynthetic process;GO:0006695//cholesterol biosynthetic process;GO:0008202//steroid metabolic process;GO:0008203//cholesterol metabolic process;GO:0016125//sterol metabolic process;GO:0016126//sterol biosynthetic process;GO:0042177//negative regulation of protein catabolic process;GO:0050709//negative regulation of protein secretion;GO:007…
ENST00000648623	ENSG00000001630	2.05x10⁻³	LINC00511-243	CYP51A1	GO:0005783//endoplasmic reticulum;GO:0005789//endoplasmic reticulum membrane;GO:0016020//membrane;GO:0016021//integral component of membrane;GO:0043231//intracellular membrane-bounded organelle	GO:0004497//monooxygenase activity;GO:0005506//iron ion binding;GO:0008398//sterol 14-demethylase activity;GO:0016491//oxidoreductase activity;GO:0016705//oxidoreductase activity, acting on paired donors, with incorporation or reduction of molecular oxygen;GO:0020037//heme binding;GO:0046872//metal ion binding	GO:0006629//lipid metabolic process;GO:0006694//steroid biosynthetic process;GO:0006695//cholesterol biosynthetic process;GO:0008202//steroid metabolic process;GO:0008203//cholesterol metabolic process;GO:0016125//sterol metabolic process;GO:0016126//sterol biosynthetic process;GO:0042177//negative regulation of protein catabolic process;GO:0050709//negative regulation of protein secretion;GO:007…
ENST00000649789	ENSG00000001630	8.48x10⁻⁴	-	CYP51A1	GO:0005783//endoplasmic reticulum;GO:0005789//endoplasmic reticulum membrane;GO:0016020//membrane;GO:0016021//integral component of membrane;GO:0043231//intracellular membrane-bounded organelle	GO:0004497//monooxygenase activity;GO:0005506//iron ion binding;GO:0008398//sterol 14-demethylase activity;GO:0016491//oxidoreductase activity;GO:0016705//oxidoreductase activity, acting on paired donors, with incorporation or reduction of molecular oxygen;GO:0020037//heme binding;GO:0046872//metal ion binding	GO:0006629//lipid metabolic process;GO:0006694//steroid biosynthetic process;GO:0006695//cholesterol biosynthetic process;GO:0008202//steroid metabolic process;GO:0008203//cholesterol metabolic process;GO:0016125//sterol metabolic process;GO:0016126//sterol biosynthetic process;GO:0042177//negative regulation of protein catabolic process;GO:0050709//negative regulation of protein secretion;GO:007…
ENST00000654389	ENSG00000001630	1.29x10⁻³	SNHG17-218	CYP51A1	GO:0005783//endoplasmic reticulum;GO:0005789//endoplasmic reticulum membrane;GO:0016020//membrane;GO:0016021//integral component of membrane;GO:0043231//intracellular membrane-bounded organelle	GO:0004497//monooxygenase activity;GO:0005506//iron ion binding;GO:0008398//sterol 14-demethylase activity;GO:0016491//oxidoreductase activity;GO:0016705//oxidoreductase activity, acting on paired donors, with incorporation or reduction of molecular oxygen;GO:0020037//heme binding;GO:0046872//metal ion binding	GO:0006629//lipid metabolic process;GO:0006694//steroid biosynthetic process;GO:0006695//cholesterol biosynthetic process;GO:0008202//steroid metabolic process;GO:0008203//cholesterol metabolic process;GO:0016125//sterol metabolic process;GO:0016126//sterol biosynthetic process;GO:0042177//negative regulation of protein catabolic process;GO:0050709//negative regulation of protein secretion;GO:007…
ENST00000659452	ENSG00000001630	1.04x10⁻³	-	CYP51A1	GO:0005783//endoplasmic reticulum;GO:0005789//endoplasmic reticulum membrane;GO:0016020//membrane;GO:0016021//integral component of membrane;GO:0043231//intracellular membrane-bounded organelle	GO:0004497//monooxygenase activity;GO:0005506//iron ion binding;GO:0008398//sterol 14-demethylase activity;GO:0016491//oxidoreductase activity;GO:0016705//oxidoreductase activity, acting on paired donors, with incorporation or reduction of molecular oxygen;GO:0020037//heme binding;GO:0046872//metal ion binding	GO:0006629//lipid metabolic process;GO:0006694//steroid biosynthetic process;GO:0006695//cholesterol biosynthetic process;GO:0008202//steroid metabolic process;GO:0008203//cholesterol metabolic process;GO:0016125//sterol metabolic process;GO:0016126//sterol biosynthetic process;GO:0042177//negative regulation of protein catabolic process;GO:0050709//negative regulation of protein secretion;GO:007…
ENST00000659781	ENSG00000001630	1.44x10⁻³	LINC02432-207	CYP51A1	GO:0005783//endoplasmic reticulum;GO:0005789//endoplasmic reticulum membrane;GO:0016020//membrane;GO:0016021//integral component of membrane;GO:0043231//intracellular membrane-bounded organelle	GO:0004497//monooxygenase activity;GO:0005506//iron ion binding;GO:0008398//sterol 14-demethylase activity;GO:0016491//oxidoreductase activity;GO:0016705//oxidoreductase activity, acting on paired donors, with incorporation or reduction of molecular oxygen;GO:0020037//heme binding;GO:0046872//metal ion binding	GO:0006629//lipid metabolic process;GO:0006694//steroid biosynthetic process;GO:0006695//cholesterol biosynthetic process;GO:0008202//steroid metabolic process;GO:0008203//cholesterol metabolic process;GO:0016125//sterol metabolic process;GO:0016126//sterol biosynthetic process;GO:0042177//negative regulation of protein catabolic process;GO:0050709//negative regulation of protein secretion;GO:007…
ENST00000667119	ENSG00000001630	2.22x10⁻⁴	SNHG15-212	CYP51A1	GO:0005783//endoplasmic reticulum;GO:0005789//endoplasmic reticulum membrane;GO:0016020//membrane;GO:0016021//integral component of membrane;GO:0043231//intracellular membrane-bounded organelle	GO:0004497//monooxygenase activity;GO:0005506//iron ion binding;GO:0008398//sterol 14-demethylase activity;GO:0016491//oxidoreductase activity;GO:0016705//oxidoreductase activity, acting on paired donors, with incorporation or reduction of molecular oxygen;GO:0020037//heme binding;GO:0046872//metal ion binding	GO:0006629//lipid metabolic process;GO:0006694//steroid biosynthetic process;GO:0006695//cholesterol biosynthetic process;GO:0008202//steroid metabolic process;GO:0008203//cholesterol metabolic process;GO:0016125//sterol metabolic process;GO:0016126//sterol biosynthetic process;GO:0042177//negative regulation of protein catabolic process;GO:0050709//negative regulation of protein secretion;GO:007…
ENST00000676598	ENSG00000001630	9.24x10⁻⁴	PCSK6-222	CYP51A1	GO:0005783//endoplasmic reticulum;GO:0005789//endoplasmic reticulum membrane;GO:0016020//membrane;GO:0016021//integral component of membrane;GO:0043231//intracellular membrane-bounded organelle	GO:0004497//monooxygenase activity;GO:0005506//iron ion binding;GO:0008398//sterol 14-demethylase activity;GO:0016491//oxidoreductase activity;GO:0016705//oxidoreductase activity, acting on paired donors, with incorporation or reduction of molecular oxygen;GO:0020037//heme binding;GO:0046872//metal ion binding	GO:0006629//lipid metabolic process;GO:0006694//steroid biosynthetic process;GO:0006695//cholesterol biosynthetic process;GO:0008202//steroid metabolic process;GO:0008203//cholesterol metabolic process;GO:0016125//sterol metabolic process;GO:0016126//sterol biosynthetic process;GO:0042177//negative regulation of protein catabolic process;GO:0050709//negative regulation of protein secretion;GO:007…
ENST00000678054	ENSG00000001630	1.84x10⁻³	KPNA2-218	CYP51A1	GO:0005783//endoplasmic reticulum;GO:0005789//endoplasmic reticulum membrane;GO:0016020//membrane;GO:0016021//integral component of membrane;GO:0043231//intracellular membrane-bounded organelle	GO:0004497//monooxygenase activity;GO:0005506//iron ion binding;GO:0008398//sterol 14-demethylase activity;GO:0016491//oxidoreductase activity;GO:0016705//oxidoreductase activity, acting on paired donors, with incorporation or reduction of molecular oxygen;GO:0020037//heme binding;GO:0046872//metal ion binding	GO:0006629//lipid metabolic process;GO:0006694//steroid biosynthetic process;GO:0006695//cholesterol biosynthetic process;GO:0008202//steroid metabolic process;GO:0008203//cholesterol metabolic process;GO:0016125//sterol metabolic process;GO:0016126//sterol biosynthetic process;GO:0042177//negative regulation of protein catabolic process;GO:0050709//negative regulation of protein secretion;GO:007…
ENST00000683492	ENSG00000001630	8.55x10⁻⁴	ZNF107-209	CYP51A1	GO:0005783//endoplasmic reticulum;GO:0005789//endoplasmic reticulum membrane;GO:0016020//membrane;GO:0016021//integral component of membrane;GO:0043231//intracellular membrane-bounded organelle	GO:0004497//monooxygenase activity;GO:0005506//iron ion binding;GO:0008398//sterol 14-demethylase activity;GO:0016491//oxidoreductase activity;GO:0016705//oxidoreductase activity, acting on paired donors, with incorporation or reduction of molecular oxygen;GO:0020037//heme binding;GO:0046872//metal ion binding	GO:0006629//lipid metabolic process;GO:0006694//steroid biosynthetic process;GO:0006695//cholesterol biosynthetic process;GO:0008202//steroid metabolic process;GO:0008203//cholesterol metabolic process;GO:0016125//sterol metabolic process;GO:0016126//sterol biosynthetic process;GO:0042177//negative regulation of protein catabolic process;GO:0050709//negative regulation of protein secretion;GO:007…
ENST00000684189	ENSG00000001630	2.28x10⁻³	EXT1-204	CYP51A1	GO:0005783//endoplasmic reticulum;GO:0005789//endoplasmic reticulum membrane;GO:0016020//membrane;GO:0016021//integral component of membrane;GO:0043231//intracellular membrane-bounded organelle	GO:0004497//monooxygenase activity;GO:0005506//iron ion binding;GO:0008398//sterol 14-demethylase activity;GO:0016491//oxidoreductase activity;GO:0016705//oxidoreductase activity, acting on paired donors, with incorporation or reduction of molecular oxygen;GO:0020037//heme binding;GO:0046872//metal ion binding	GO:0006629//lipid metabolic process;GO:0006694//steroid biosynthetic process;GO:0006695//cholesterol biosynthetic process;GO:0008202//steroid metabolic process;GO:0008203//cholesterol metabolic process;GO:0016125//sterol metabolic process;GO:0016126//sterol biosynthetic process;GO:0042177//negative regulation of protein catabolic process;GO:0050709//negative regulation of protein secretion;GO:007…
ENST00000687035	ENSG00000001630	3.76x10⁻⁴	-	CYP51A1	GO:0005783//endoplasmic reticulum;GO:0005789//endoplasmic reticulum membrane;GO:0016020//membrane;GO:0016021//integral component of membrane;GO:0043231//intracellular membrane-bounded organelle	GO:0004497//monooxygenase activity;GO:0005506//iron ion binding;GO:0008398//sterol 14-demethylase activity;GO:0016491//oxidoreductase activity;GO:0016705//oxidoreductase activity, acting on paired donors, with incorporation or reduction of molecular oxygen;GO:0020037//heme binding;GO:0046872//metal ion binding	GO:0006629//lipid metabolic process;GO:0006694//steroid biosynthetic process;GO:0006695//cholesterol biosynthetic process;GO:0008202//steroid metabolic process;GO:0008203//cholesterol metabolic process;GO:0016125//sterol metabolic process;GO:0016126//sterol biosynthetic process;GO:0042177//negative regulation of protein catabolic process;GO:0050709//negative regulation of protein secretion;GO:007…
ENST00000687575	ENSG00000001630	3.76x10⁻⁴	-	CYP51A1	GO:0005783//endoplasmic reticulum;GO:0005789//endoplasmic reticulum membrane;GO:0016020//membrane;GO:0016021//integral component of membrane;GO:0043231//intracellular membrane-bounded organelle	GO:0004497//monooxygenase activity;GO:0005506//iron ion binding;GO:0008398//sterol 14-demethylase activity;GO:0016491//oxidoreductase activity;GO:0016705//oxidoreductase activity, acting on paired donors, with incorporation or reduction of molecular oxygen;GO:0020037//heme binding;GO:0046872//metal ion binding	GO:0006629//lipid metabolic process;GO:0006694//steroid biosynthetic process;GO:0006695//cholesterol biosynthetic process;GO:0008202//steroid metabolic process;GO:0008203//cholesterol metabolic process;GO:0016125//sterol metabolic process;GO:0016126//sterol biosynthetic process;GO:0042177//negative regulation of protein catabolic process;GO:0050709//negative regulation of protein secretion;GO:007…
ENST00000688880	ENSG00000001630	2.41x10⁻³	BMS1P23-222	CYP51A1	GO:0005783//endoplasmic reticulum;GO:0005789//endoplasmic reticulum membrane;GO:0016020//membrane;GO:0016021//integral component of membrane;GO:0043231//intracellular membrane-bounded organelle	GO:0004497//monooxygenase activity;GO:0005506//iron ion binding;GO:0008398//sterol 14-demethylase activity;GO:0016491//oxidoreductase activity;GO:0016705//oxidoreductase activity, acting on paired donors, with incorporation or reduction of molecular oxygen;GO:0020037//heme binding;GO:0046872//metal ion binding	GO:0006629//lipid metabolic process;GO:0006694//steroid biosynthetic process;GO:0006695//cholesterol biosynthetic process;GO:0008202//steroid metabolic process;GO:0008203//cholesterol metabolic process;GO:0016125//sterol metabolic process;GO:0016126//sterol biosynthetic process;GO:0042177//negative regulation of protein catabolic process;GO:0050709//negative regulation of protein secretion;GO:007…
ENST00000691693	ENSG00000001630	1.73x10⁻³	CCR5AS-203	CYP51A1	GO:0005783//endoplasmic reticulum;GO:0005789//endoplasmic reticulum membrane;GO:0016020//membrane;GO:0016021//integral component of membrane;GO:0043231//intracellular membrane-bounded organelle	GO:0004497//monooxygenase activity;GO:0005506//iron ion binding;GO:0008398//sterol 14-demethylase activity;GO:0016491//oxidoreductase activity;GO:0016705//oxidoreductase activity, acting on paired donors, with incorporation or reduction of molecular oxygen;GO:0020037//heme binding;GO:0046872//metal ion binding	GO:0006629//lipid metabolic process;GO:0006694//steroid biosynthetic process;GO:0006695//cholesterol biosynthetic process;GO:0008202//steroid metabolic process;GO:0008203//cholesterol metabolic process;GO:0016125//sterol metabolic process;GO:0016126//sterol biosynthetic process;GO:0042177//negative regulation of protein catabolic process;GO:0050709//negative regulation of protein secretion;GO:007…
MSTRG.10478.1	ENSG00000001630	8.72x10⁻⁴	-	CYP51A1	GO:0005783//endoplasmic reticulum;GO:0005789//endoplasmic reticulum membrane;GO:0016020//membrane;GO:0016021//integral component of membrane;GO:0043231//intracellular membrane-bounded organelle	GO:0004497//monooxygenase activity;GO:0005506//iron ion binding;GO:0008398//sterol 14-demethylase activity;GO:0016491//oxidoreductase activity;GO:0016705//oxidoreductase activity, acting on paired donors, with incorporation or reduction of molecular oxygen;GO:0020037//heme binding;GO:0046872//metal ion binding	GO:0006629//lipid metabolic process;GO:0006694//steroid biosynthetic process;GO:0006695//cholesterol biosynthetic process;GO:0008202//steroid metabolic process;GO:0008203//cholesterol metabolic process;GO:0016125//sterol metabolic process;GO:0016126//sterol biosynthetic process;GO:0042177//negative regulation of protein catabolic process;GO:0050709//negative regulation of protein secretion;GO:007…
MSTRG.14210.2	ENSG00000001630	9.30x10⁻⁴	-	CYP51A1	GO:0005783//endoplasmic reticulum;GO:0005789//endoplasmic reticulum membrane;GO:0016020//membrane;GO:0016021//integral component of membrane;GO:0043231//intracellular membrane-bounded organelle	GO:0004497//monooxygenase activity;GO:0005506//iron ion binding;GO:0008398//sterol 14-demethylase activity;GO:0016491//oxidoreductase activity;GO:0016705//oxidoreductase activity, acting on paired donors, with incorporation or reduction of molecular oxygen;GO:0020037//heme binding;GO:0046872//metal ion binding	GO:0006629//lipid metabolic process;GO:0006694//steroid biosynthetic process;GO:0006695//cholesterol biosynthetic process;GO:0008202//steroid metabolic process;GO:0008203//cholesterol metabolic process;GO:0016125//sterol metabolic process;GO:0016126//sterol biosynthetic process;GO:0042177//negative regulation of protein catabolic process;GO:0050709//negative regulation of protein secretion;GO:007…
MSTRG.14740.4	ENSG00000001630	4.39x10⁻⁵	-	CYP51A1	GO:0005783//endoplasmic reticulum;GO:0005789//endoplasmic reticulum membrane;GO:0016020//membrane;GO:0016021//integral component of membrane;GO:0043231//intracellular membrane-bounded organelle	GO:0004497//monooxygenase activity;GO:0005506//iron ion binding;GO:0008398//sterol 14-demethylase activity;GO:0016491//oxidoreductase activity;GO:0016705//oxidoreductase activity, acting on paired donors, with incorporation or reduction of molecular oxygen;GO:0020037//heme binding;GO:0046872//metal ion binding	GO:0006629//lipid metabolic process;GO:0006694//steroid biosynthetic process;GO:0006695//cholesterol biosynthetic process;GO:0008202//steroid metabolic process;GO:0008203//cholesterol metabolic process;GO:0016125//sterol metabolic process;GO:0016126//sterol biosynthetic process;GO:0042177//negative regulation of protein catabolic process;GO:0050709//negative regulation of protein secretion;GO:007…
MSTRG.16535.1	ENSG00000001630	6.90x10⁻⁵	-	CYP51A1	GO:0005783//endoplasmic reticulum;GO:0005789//endoplasmic reticulum membrane;GO:0016020//membrane;GO:0016021//integral component of membrane;GO:0043231//intracellular membrane-bounded organelle	GO:0004497//monooxygenase activity;GO:0005506//iron ion binding;GO:0008398//sterol 14-demethylase activity;GO:0016491//oxidoreductase activity;GO:0016705//oxidoreductase activity, acting on paired donors, with incorporation or reduction of molecular oxygen;GO:0020037//heme binding;GO:0046872//metal ion binding	GO:0006629//lipid metabolic process;GO:0006694//steroid biosynthetic process;GO:0006695//cholesterol biosynthetic process;GO:0008202//steroid metabolic process;GO:0008203//cholesterol metabolic process;GO:0016125//sterol metabolic process;GO:0016126//sterol biosynthetic process;GO:0042177//negative regulation of protein catabolic process;GO:0050709//negative regulation of protein secretion;GO:007…
MSTRG.19223.5	ENSG00000001630	2.22x10⁻³	-	CYP51A1	GO:0005783//endoplasmic reticulum;GO:0005789//endoplasmic reticulum membrane;GO:0016020//membrane;GO:0016021//integral component of membrane;GO:0043231//intracellular membrane-bounded organelle	GO:0004497//monooxygenase activity;GO:0005506//iron ion binding;GO:0008398//sterol 14-demethylase activity;GO:0016491//oxidoreductase activity;GO:0016705//oxidoreductase activity, acting on paired donors, with incorporation or reduction of molecular oxygen;GO:0020037//heme binding;GO:0046872//metal ion binding	GO:0006629//lipid metabolic process;GO:0006694//steroid biosynthetic process;GO:0006695//cholesterol biosynthetic process;GO:0008202//steroid metabolic process;GO:0008203//cholesterol metabolic process;GO:0016125//sterol metabolic process;GO:0016126//sterol biosynthetic process;GO:0042177//negative regulation of protein catabolic process;GO:0050709//negative regulation of protein secretion;GO:007…
MSTRG.19229.3	ENSG00000001630	4.90x10⁻⁴	-	CYP51A1	GO:0005783//endoplasmic reticulum;GO:0005789//endoplasmic reticulum membrane;GO:0016020//membrane;GO:0016021//integral component of membrane;GO:0043231//intracellular membrane-bounded organelle	GO:0004497//monooxygenase activity;GO:0005506//iron ion binding;GO:0008398//sterol 14-demethylase activity;GO:0016491//oxidoreductase activity;GO:0016705//oxidoreductase activity, acting on paired donors, with incorporation or reduction of molecular oxygen;GO:0020037//heme binding;GO:0046872//metal ion binding	GO:0006629//lipid metabolic process;GO:0006694//steroid biosynthetic process;GO:0006695//cholesterol biosynthetic process;GO:0008202//steroid metabolic process;GO:0008203//cholesterol metabolic process;GO:0016125//sterol metabolic process;GO:0016126//sterol biosynthetic process;GO:0042177//negative regulation of protein catabolic process;GO:0050709//negative regulation of protein secretion;GO:007…
MSTRG.19288.1	ENSG00000001630	6.78x10⁻⁴	-	CYP51A1	GO:0005783//endoplasmic reticulum;GO:0005789//endoplasmic reticulum membrane;GO:0016020//membrane;GO:0016021//integral component of membrane;GO:0043231//intracellular membrane-bounded organelle	GO:0004497//monooxygenase activity;GO:0005506//iron ion binding;GO:0008398//sterol 14-demethylase activity;GO:0016491//oxidoreductase activity;GO:0016705//oxidoreductase activity, acting on paired donors, with incorporation or reduction of molecular oxygen;GO:0020037//heme binding;GO:0046872//metal ion binding	GO:0006629//lipid metabolic process;GO:0006694//steroid biosynthetic process;GO:0006695//cholesterol biosynthetic process;GO:0008202//steroid metabolic process;GO:0008203//cholesterol metabolic process;GO:0016125//sterol metabolic process;GO:0016126//sterol biosynthetic process;GO:0042177//negative regulation of protein catabolic process;GO:0050709//negative regulation of protein secretion;GO:007…
MSTRG.19288.2	ENSG00000001630	2.60x10⁻³	-	CYP51A1	GO:0005783//endoplasmic reticulum;GO:0005789//endoplasmic reticulum membrane;GO:0016020//membrane;GO:0016021//integral component of membrane;GO:0043231//intracellular membrane-bounded organelle	GO:0004497//monooxygenase activity;GO:0005506//iron ion binding;GO:0008398//sterol 14-demethylase activity;GO:0016491//oxidoreductase activity;GO:0016705//oxidoreductase activity, acting on paired donors, with incorporation or reduction of molecular oxygen;GO:0020037//heme binding;GO:0046872//metal ion binding	GO:0006629//lipid metabolic process;GO:0006694//steroid biosynthetic process;GO:0006695//cholesterol biosynthetic process;GO:0008202//steroid metabolic process;GO:0008203//cholesterol metabolic process;GO:0016125//sterol metabolic process;GO:0016126//sterol biosynthetic process;GO:0042177//negative regulation of protein catabolic process;GO:0050709//negative regulation of protein secretion;GO:007…
MSTRG.19368.1	ENSG00000001630	5.22x10⁻⁴	-	CYP51A1	GO:0005783//endoplasmic reticulum;GO:0005789//endoplasmic reticulum membrane;GO:0016020//membrane;GO:0016021//integral component of membrane;GO:0043231//intracellular membrane-bounded organelle	GO:0004497//monooxygenase activity;GO:0005506//iron ion binding;GO:0008398//sterol 14-demethylase activity;GO:0016491//oxidoreductase activity;GO:0016705//oxidoreductase activity, acting on paired donors, with incorporation or reduction of molecular oxygen;GO:0020037//heme binding;GO:0046872//metal ion binding	GO:0006629//lipid metabolic process;GO:0006694//steroid biosynthetic process;GO:0006695//cholesterol biosynthetic process;GO:0008202//steroid metabolic process;GO:0008203//cholesterol metabolic process;GO:0016125//sterol metabolic process;GO:0016126//sterol biosynthetic process;GO:0042177//negative regulation of protein catabolic process;GO:0050709//negative regulation of protein secretion;GO:007…
MSTRG.19370.1	ENSG00000001630	3.36x10⁻³	-	CYP51A1	GO:0005783//endoplasmic reticulum;GO:0005789//endoplasmic reticulum membrane;GO:0016020//membrane;GO:0016021//integral component of membrane;GO:0043231//intracellular membrane-bounded organelle	GO:0004497//monooxygenase activity;GO:0005506//iron ion binding;GO:0008398//sterol 14-demethylase activity;GO:0016491//oxidoreductase activity;GO:0016705//oxidoreductase activity, acting on paired donors, with incorporation or reduction of molecular oxygen;GO:0020037//heme binding;GO:0046872//metal ion binding	GO:0006629//lipid metabolic process;GO:0006694//steroid biosynthetic process;GO:0006695//cholesterol biosynthetic process;GO:0008202//steroid metabolic process;GO:0008203//cholesterol metabolic process;GO:0016125//sterol metabolic process;GO:0016126//sterol biosynthetic process;GO:0042177//negative regulation of protein catabolic process;GO:0050709//negative regulation of protein secretion;GO:007…
MSTRG.19372.1	ENSG00000001630	2.65x10⁻³	-	CYP51A1	GO:0005783//endoplasmic reticulum;GO:0005789//endoplasmic reticulum membrane;GO:0016020//membrane;GO:0016021//integral component of membrane;GO:0043231//intracellular membrane-bounded organelle	GO:0004497//monooxygenase activity;GO:0005506//iron ion binding;GO:0008398//sterol 14-demethylase activity;GO:0016491//oxidoreductase activity;GO:0016705//oxidoreductase activity, acting on paired donors, with incorporation or reduction of molecular oxygen;GO:0020037//heme binding;GO:0046872//metal ion binding	GO:0006629//lipid metabolic process;GO:0006694//steroid biosynthetic process;GO:0006695//cholesterol biosynthetic process;GO:0008202//steroid metabolic process;GO:0008203//cholesterol metabolic process;GO:0016125//sterol metabolic process;GO:0016126//sterol biosynthetic process;GO:0042177//negative regulation of protein catabolic process;GO:0050709//negative regulation of protein secretion;GO:007…
MSTRG.19832.3	ENSG00000001630	6.21x10⁻⁵	-	CYP51A1	GO:0005783//endoplasmic reticulum;GO:0005789//endoplasmic reticulum membrane;GO:0016020//membrane;GO:0016021//integral component of membrane;GO:0043231//intracellular membrane-bounded organelle	GO:0004497//monooxygenase activity;GO:0005506//iron ion binding;GO:0008398//sterol 14-demethylase activity;GO:0016491//oxidoreductase activity;GO:0016705//oxidoreductase activity, acting on paired donors, with incorporation or reduction of molecular oxygen;GO:0020037//heme binding;GO:0046872//metal ion binding	GO:0006629//lipid metabolic process;GO:0006694//steroid biosynthetic process;GO:0006695//cholesterol biosynthetic process;GO:0008202//steroid metabolic process;GO:0008203//cholesterol metabolic process;GO:0016125//sterol metabolic process;GO:0016126//sterol biosynthetic process;GO:0042177//negative regulation of protein catabolic process;GO:0050709//negative regulation of protein secretion;GO:007…
MSTRG.20287.2	ENSG00000001630	3.51x10⁻³	-	CYP51A1	GO:0005783//endoplasmic reticulum;GO:0005789//endoplasmic reticulum membrane;GO:0016020//membrane;GO:0016021//integral component of membrane;GO:0043231//intracellular membrane-bounded organelle	GO:0004497//monooxygenase activity;GO:0005506//iron ion binding;GO:0008398//sterol 14-demethylase activity;GO:0016491//oxidoreductase activity;GO:0016705//oxidoreductase activity, acting on paired donors, with incorporation or reduction of molecular oxygen;GO:0020037//heme binding;GO:0046872//metal ion binding	GO:0006629//lipid metabolic process;GO:0006694//steroid biosynthetic process;GO:0006695//cholesterol biosynthetic process;GO:0008202//steroid metabolic process;GO:0008203//cholesterol metabolic process;GO:0016125//sterol metabolic process;GO:0016126//sterol biosynthetic process;GO:0042177//negative regulation of protein catabolic process;GO:0050709//negative regulation of protein secretion;GO:007…
MSTRG.20291.1	ENSG00000001630	1.91x10⁻³	-	CYP51A1	GO:0005783//endoplasmic reticulum;GO:0005789//endoplasmic reticulum membrane;GO:0016020//membrane;GO:0016021//integral component of membrane;GO:0043231//intracellular membrane-bounded organelle	GO:0004497//monooxygenase activity;GO:0005506//iron ion binding;GO:0008398//sterol 14-demethylase activity;GO:0016491//oxidoreductase activity;GO:0016705//oxidoreductase activity, acting on paired donors, with incorporation or reduction of molecular oxygen;GO:0020037//heme binding;GO:0046872//metal ion binding	GO:0006629//lipid metabolic process;GO:0006694//steroid biosynthetic process;GO:0006695//cholesterol biosynthetic process;GO:0008202//steroid metabolic process;GO:0008203//cholesterol metabolic process;GO:0016125//sterol metabolic process;GO:0016126//sterol biosynthetic process;GO:0042177//negative regulation of protein catabolic process;GO:0050709//negative regulation of protein secretion;GO:007…
MSTRG.4038.1	ENSG00000001630	1.07x10⁻³	-	CYP51A1	GO:0005783//endoplasmic reticulum;GO:0005789//endoplasmic reticulum membrane;GO:0016020//membrane;GO:0016021//integral component of membrane;GO:0043231//intracellular membrane-bounded organelle	GO:0004497//monooxygenase activity;GO:0005506//iron ion binding;GO:0008398//sterol 14-demethylase activity;GO:0016491//oxidoreductase activity;GO:0016705//oxidoreductase activity, acting on paired donors, with incorporation or reduction of molecular oxygen;GO:0020037//heme binding;GO:0046872//metal ion binding	GO:0006629//lipid metabolic process;GO:0006694//steroid biosynthetic process;GO:0006695//cholesterol biosynthetic process;GO:0008202//steroid metabolic process;GO:0008203//cholesterol metabolic process;GO:0016125//sterol metabolic process;GO:0016126//sterol biosynthetic process;GO:0042177//negative regulation of protein catabolic process;GO:0050709//negative regulation of protein secretion;GO:007…
MSTRG.484.6	ENSG00000001630	1.47x10⁻³	-	CYP51A1	GO:0005783//endoplasmic reticulum;GO:0005789//endoplasmic reticulum membrane;GO:0016020//membrane;GO:0016021//integral component of membrane;GO:0043231//intracellular membrane-bounded organelle	GO:0004497//monooxygenase activity;GO:0005506//iron ion binding;GO:0008398//sterol 14-demethylase activity;GO:0016491//oxidoreductase activity;GO:0016705//oxidoreductase activity, acting on paired donors, with incorporation or reduction of molecular oxygen;GO:0020037//heme binding;GO:0046872//metal ion binding	GO:0006629//lipid metabolic process;GO:0006694//steroid biosynthetic process;GO:0006695//cholesterol biosynthetic process;GO:0008202//steroid metabolic process;GO:0008203//cholesterol metabolic process;GO:0016125//sterol metabolic process;GO:0016126//sterol biosynthetic process;GO:0042177//negative regulation of protein catabolic process;GO:0050709//negative regulation of protein secretion;GO:007…
MSTRG.6200.2	ENSG00000001630	1.02x10⁻³	-	CYP51A1	GO:0005783//endoplasmic reticulum;GO:0005789//endoplasmic reticulum membrane;GO:0016020//membrane;GO:0016021//integral component of membrane;GO:0043231//intracellular membrane-bounded organelle	GO:0004497//monooxygenase activity;GO:0005506//iron ion binding;GO:0008398//sterol 14-demethylase activity;GO:0016491//oxidoreductase activity;GO:0016705//oxidoreductase activity, acting on paired donors, with incorporation or reduction of molecular oxygen;GO:0020037//heme binding;GO:0046872//metal ion binding	GO:0006629//lipid metabolic process;GO:0006694//steroid biosynthetic process;GO:0006695//cholesterol biosynthetic process;GO:0008202//steroid metabolic process;GO:0008203//cholesterol metabolic process;GO:0016125//sterol metabolic process;GO:0016126//sterol biosynthetic process;GO:0042177//negative regulation of protein catabolic process;GO:0050709//negative regulation of protein secretion;GO:007…
MSTRG.7196.4	ENSG00000001630	8.59x10⁻⁴	-	CYP51A1	GO:0005783//endoplasmic reticulum;GO:0005789//endoplasmic reticulum membrane;GO:0016020//membrane;GO:0016021//integral component of membrane;GO:0043231//intracellular membrane-bounded organelle	GO:0004497//monooxygenase activity;GO:0005506//iron ion binding;GO:0008398//sterol 14-demethylase activity;GO:0016491//oxidoreductase activity;GO:0016705//oxidoreductase activity, acting on paired donors, with incorporation or reduction of molecular oxygen;GO:0020037//heme binding;GO:0046872//metal ion binding	GO:0006629//lipid metabolic process;GO:0006694//steroid biosynthetic process;GO:0006695//cholesterol biosynthetic process;GO:0008202//steroid metabolic process;GO:0008203//cholesterol metabolic process;GO:0016125//sterol metabolic process;GO:0016126//sterol biosynthetic process;GO:0042177//negative regulation of protein catabolic process;GO:0050709//negative regulation of protein secretion;GO:007…
MSTRG.7204.1	ENSG00000001630	1.06x10⁻³	-	CYP51A1	GO:0005783//endoplasmic reticulum;GO:0005789//endoplasmic reticulum membrane;GO:0016020//membrane;GO:0016021//integral component of membrane;GO:0043231//intracellular membrane-bounded organelle	GO:0004497//monooxygenase activity;GO:0005506//iron ion binding;GO:0008398//sterol 14-demethylase activity;GO:0016491//oxidoreductase activity;GO:0016705//oxidoreductase activity, acting on paired donors, with incorporation or reduction of molecular oxygen;GO:0020037//heme binding;GO:0046872//metal ion binding	GO:0006629//lipid metabolic process;GO:0006694//steroid biosynthetic process;GO:0006695//cholesterol biosynthetic process;GO:0008202//steroid metabolic process;GO:0008203//cholesterol metabolic process;GO:0016125//sterol metabolic process;GO:0016126//sterol biosynthetic process;GO:0042177//negative regulation of protein catabolic process;GO:0050709//negative regulation of protein secretion;GO:007…
MSTRG.7205.1	ENSG00000001630	5.92x10⁻⁴	-	CYP51A1	GO:0005783//endoplasmic reticulum;GO:0005789//endoplasmic reticulum membrane;GO:0016020//membrane;GO:0016021//integral component of membrane;GO:0043231//intracellular membrane-bounded organelle	GO:0004497//monooxygenase activity;GO:0005506//iron ion binding;GO:0008398//sterol 14-demethylase activity;GO:0016491//oxidoreductase activity;GO:0016705//oxidoreductase activity, acting on paired donors, with incorporation or reduction of molecular oxygen;GO:0020037//heme binding;GO:0046872//metal ion binding	GO:0006629//lipid metabolic process;GO:0006694//steroid biosynthetic process;GO:0006695//cholesterol biosynthetic process;GO:0008202//steroid metabolic process;GO:0008203//cholesterol metabolic process;GO:0016125//sterol metabolic process;GO:0016126//sterol biosynthetic process;GO:0042177//negative regulation of protein catabolic process;GO:0050709//negative regulation of protein secretion;GO:007…
MSTRG.7207.1	ENSG00000001630	1.38x10⁻³	-	CYP51A1	GO:0005783//endoplasmic reticulum;GO:0005789//endoplasmic reticulum membrane;GO:0016020//membrane;GO:0016021//integral component of membrane;GO:0043231//intracellular membrane-bounded organelle	GO:0004497//monooxygenase activity;GO:0005506//iron ion binding;GO:0008398//sterol 14-demethylase activity;GO:0016491//oxidoreductase activity;GO:0016705//oxidoreductase activity, acting on paired donors, with incorporation or reduction of molecular oxygen;GO:0020037//heme binding;GO:0046872//metal ion binding	GO:0006629//lipid metabolic process;GO:0006694//steroid biosynthetic process;GO:0006695//cholesterol biosynthetic process;GO:0008202//steroid metabolic process;GO:0008203//cholesterol metabolic process;GO:0016125//sterol metabolic process;GO:0016126//sterol biosynthetic process;GO:0042177//negative regulation of protein catabolic process;GO:0050709//negative regulation of protein secretion;GO:007…
ENST00000541754	ENSG00000002587	2.19x10⁻³	NNMT-205	HS3ST1	GO:0005794//Golgi apparatus;GO:0005796//Golgi lumen	GO:0008146//sulfotransferase activity;GO:0008467//[heparan sulfate]-glucosamine 3-sulfotransferase 1 activity;GO:0016740//transferase activity	GO:0006024//glycosaminoglycan biosynthetic process;GO:1901135//carbohydrate derivative metabolic process;GO:1901564//organonitrogen compound metabolic process
ENST00000546642	ENSG00000002587	1.19x10⁻³	LUM-202	HS3ST1	GO:0005794//Golgi apparatus;GO:0005796//Golgi lumen	GO:0008146//sulfotransferase activity;GO:0008467//[heparan sulfate]-glucosamine 3-sulfotransferase 1 activity;GO:0016740//transferase activity	GO:0006024//glycosaminoglycan biosynthetic process;GO:1901135//carbohydrate derivative metabolic process;GO:1901564//organonitrogen compound metabolic process
ENST00000548071	ENSG00000002587	3.22x10⁻³	LUM-203	HS3ST1	GO:0005794//Golgi apparatus;GO:0005796//Golgi lumen	GO:0008146//sulfotransferase activity;GO:0008467//[heparan sulfate]-glucosamine 3-sulfotransferase 1 activity;GO:0016740//transferase activity	GO:0006024//glycosaminoglycan biosynthetic process;GO:1901135//carbohydrate derivative metabolic process;GO:1901564//organonitrogen compound metabolic process
ENST00000605067	ENSG00000002587	9.68x10⁻⁴	GFOD1-205	HS3ST1	GO:0005794//Golgi apparatus;GO:0005796//Golgi lumen	GO:0008146//sulfotransferase activity;GO:0008467//[heparan sulfate]-glucosamine 3-sulfotransferase 1 activity;GO:0016740//transferase activity	GO:0006024//glycosaminoglycan biosynthetic process;GO:1901135//carbohydrate derivative metabolic process;GO:1901564//organonitrogen compound metabolic process
ENST00000614356	ENSG00000002587	1.14x10⁻³	LINC00842-201	HS3ST1	GO:0005794//Golgi apparatus;GO:0005796//Golgi lumen	GO:0008146//sulfotransferase activity;GO:0008467//[heparan sulfate]-glucosamine 3-sulfotransferase 1 activity;GO:0016740//transferase activity	GO:0006024//glycosaminoglycan biosynthetic process;GO:1901135//carbohydrate derivative metabolic process;GO:1901564//organonitrogen compound metabolic process
ENST00000648623	ENSG00000002587	2.41x10⁻³	LINC00511-243	HS3ST1	GO:0005794//Golgi apparatus;GO:0005796//Golgi lumen	GO:0008146//sulfotransferase activity;GO:0008467//[heparan sulfate]-glucosamine 3-sulfotransferase 1 activity;GO:0016740//transferase activity	GO:0006024//glycosaminoglycan biosynthetic process;GO:1901135//carbohydrate derivative metabolic process;GO:1901564//organonitrogen compound metabolic process
ENST00000695822	ENSG00000002587	2.03x10⁻³	CD55-214	HS3ST1	GO:0005794//Golgi apparatus;GO:0005796//Golgi lumen	GO:0008146//sulfotransferase activity;GO:0008467//[heparan sulfate]-glucosamine 3-sulfotransferase 1 activity;GO:0016740//transferase activity	GO:0006024//glycosaminoglycan biosynthetic process;GO:1901135//carbohydrate derivative metabolic process;GO:1901564//organonitrogen compound metabolic process
MSTRG.4002.1	ENSG00000002587	2.45x10⁻³	-	HS3ST1	GO:0005794//Golgi apparatus;GO:0005796//Golgi lumen	GO:0008146//sulfotransferase activity;GO:0008467//[heparan sulfate]-glucosamine 3-sulfotransferase 1 activity;GO:0016740//transferase activity	GO:0006024//glycosaminoglycan biosynthetic process;GO:1901135//carbohydrate derivative metabolic process;GO:1901564//organonitrogen compound metabolic process
ENST00000343528	ENSG00000003147	7.73x10⁻⁴	PDXK-203	ICA1	GO:0000139//Golgi membrane;GO:0005737//cytoplasm;GO:0005794//Golgi apparatus;GO:0005829//cytosol;GO:0012505//endomembrane system;GO:0016020//membrane;GO:0016021//integral component of membrane;GO:0030054//cell junction;GO:0030658//transport vesicle membrane;GO:0030667//secretory granule membrane;GO:0030672//synaptic vesicle membrane;GO:0031410//cytoplasmic vesicle;GO:0043231//intracellular membra…	GO:0005515//protein binding;GO:0019904//protein domain specific binding;GO:0140090//membrane curvature sensor activity	GO:0006836//neurotransmitter transport;GO:0050796//regulation of insulin secretion;GO:0051049//regulation of transport
ENST00000391874	ENSG00000003147	5.49x10⁻⁵	ENAH-205	ICA1	GO:0000139//Golgi membrane;GO:0005737//cytoplasm;GO:0005794//Golgi apparatus;GO:0005829//cytosol;GO:0012505//endomembrane system;GO:0016020//membrane;GO:0016021//integral component of membrane;GO:0030054//cell junction;GO:0030658//transport vesicle membrane;GO:0030667//secretory granule membrane;GO:0030672//synaptic vesicle membrane;GO:0031410//cytoplasmic vesicle;GO:0043231//intracellular membra…	GO:0005515//protein binding;GO:0019904//protein domain specific binding;GO:0140090//membrane curvature sensor activity	GO:0006836//neurotransmitter transport;GO:0050796//regulation of insulin secretion;GO:0051049//regulation of transport
ENST00000414739	ENSG00000003147	2.52x10⁻³	CASTOR3-202	ICA1	GO:0000139//Golgi membrane;GO:0005737//cytoplasm;GO:0005794//Golgi apparatus;GO:0005829//cytosol;GO:0012505//endomembrane system;GO:0016020//membrane;GO:0016021//integral component of membrane;GO:0030054//cell junction;GO:0030658//transport vesicle membrane;GO:0030667//secretory granule membrane;GO:0030672//synaptic vesicle membrane;GO:0031410//cytoplasmic vesicle;GO:0043231//intracellular membra…	GO:0005515//protein binding;GO:0019904//protein domain specific binding;GO:0140090//membrane curvature sensor activity	GO:0006836//neurotransmitter transport;GO:0050796//regulation of insulin secretion;GO:0051049//regulation of transport
ENST00000423891	ENSG00000003147	1.99x10⁻³	JAG1-202	ICA1	GO:0000139//Golgi membrane;GO:0005737//cytoplasm;GO:0005794//Golgi apparatus;GO:0005829//cytosol;GO:0012505//endomembrane system;GO:0016020//membrane;GO:0016021//integral component of membrane;GO:0030054//cell junction;GO:0030658//transport vesicle membrane;GO:0030667//secretory granule membrane;GO:0030672//synaptic vesicle membrane;GO:0031410//cytoplasmic vesicle;GO:0043231//intracellular membra…	GO:0005515//protein binding;GO:0019904//protein domain specific binding;GO:0140090//membrane curvature sensor activity	GO:0006836//neurotransmitter transport;GO:0050796//regulation of insulin secretion;GO:0051049//regulation of transport
ENST00000455909	ENSG00000003147	4.06x10⁻⁴	FKBP9P1-202	ICA1	GO:0000139//Golgi membrane;GO:0005737//cytoplasm;GO:0005794//Golgi apparatus;GO:0005829//cytosol;GO:0012505//endomembrane system;GO:0016020//membrane;GO:0016021//integral component of membrane;GO:0030054//cell junction;GO:0030658//transport vesicle membrane;GO:0030667//secretory granule membrane;GO:0030672//synaptic vesicle membrane;GO:0031410//cytoplasmic vesicle;GO:0043231//intracellular membra…	GO:0005515//protein binding;GO:0019904//protein domain specific binding;GO:0140090//membrane curvature sensor activity	GO:0006836//neurotransmitter transport;GO:0050796//regulation of insulin secretion;GO:0051049//regulation of transport
ENST00000466496	ENSG00000003147	1.62x10⁻³	MTMR11-203	ICA1	GO:0000139//Golgi membrane;GO:0005737//cytoplasm;GO:0005794//Golgi apparatus;GO:0005829//cytosol;GO:0012505//endomembrane system;GO:0016020//membrane;GO:0016021//integral component of membrane;GO:0030054//cell junction;GO:0030658//transport vesicle membrane;GO:0030667//secretory granule membrane;GO:0030672//synaptic vesicle membrane;GO:0031410//cytoplasmic vesicle;GO:0043231//intracellular membra…	GO:0005515//protein binding;GO:0019904//protein domain specific binding;GO:0140090//membrane curvature sensor activity	GO:0006836//neurotransmitter transport;GO:0050796//regulation of insulin secretion;GO:0051049//regulation of transport
ENST00000473778	ENSG00000003147	2.17x10⁻³	AOPEP-213	ICA1	GO:0000139//Golgi membrane;GO:0005737//cytoplasm;GO:0005794//Golgi apparatus;GO:0005829//cytosol;GO:0012505//endomembrane system;GO:0016020//membrane;GO:0016021//integral component of membrane;GO:0030054//cell junction;GO:0030658//transport vesicle membrane;GO:0030667//secretory granule membrane;GO:0030672//synaptic vesicle membrane;GO:0031410//cytoplasmic vesicle;GO:0043231//intracellular membra…	GO:0005515//protein binding;GO:0019904//protein domain specific binding;GO:0140090//membrane curvature sensor activity	GO:0006836//neurotransmitter transport;GO:0050796//regulation of insulin secretion;GO:0051049//regulation of transport
ENST00000475181	ENSG00000003147	1.54x10⁻³	CCDC80-206	ICA1	GO:0000139//Golgi membrane;GO:0005737//cytoplasm;GO:0005794//Golgi apparatus;GO:0005829//cytosol;GO:0012505//endomembrane system;GO:0016020//membrane;GO:0016021//integral component of membrane;GO:0030054//cell junction;GO:0030658//transport vesicle membrane;GO:0030667//secretory granule membrane;GO:0030672//synaptic vesicle membrane;GO:0031410//cytoplasmic vesicle;GO:0043231//intracellular membra…	GO:0005515//protein binding;GO:0019904//protein domain specific binding;GO:0140090//membrane curvature sensor activity	GO:0006836//neurotransmitter transport;GO:0050796//regulation of insulin secretion;GO:0051049//regulation of transport
ENST00000477661	ENSG00000003147	9.00x10⁻⁵	AKR1C1-205	ICA1	GO:0000139//Golgi membrane;GO:0005737//cytoplasm;GO:0005794//Golgi apparatus;GO:0005829//cytosol;GO:0012505//endomembrane system;GO:0016020//membrane;GO:0016021//integral component of membrane;GO:0030054//cell junction;GO:0030658//transport vesicle membrane;GO:0030667//secretory granule membrane;GO:0030672//synaptic vesicle membrane;GO:0031410//cytoplasmic vesicle;GO:0043231//intracellular membra…	GO:0005515//protein binding;GO:0019904//protein domain specific binding;GO:0140090//membrane curvature sensor activity	GO:0006836//neurotransmitter transport;GO:0050796//regulation of insulin secretion;GO:0051049//regulation of transport
ENST00000480992	ENSG00000003147	2.33x10⁻⁴	NOP56-213	ICA1	GO:0000139//Golgi membrane;GO:0005737//cytoplasm;GO:0005794//Golgi apparatus;GO:0005829//cytosol;GO:0012505//endomembrane system;GO:0016020//membrane;GO:0016021//integral component of membrane;GO:0030054//cell junction;GO:0030658//transport vesicle membrane;GO:0030667//secretory granule membrane;GO:0030672//synaptic vesicle membrane;GO:0031410//cytoplasmic vesicle;GO:0043231//intracellular membra…	GO:0005515//protein binding;GO:0019904//protein domain specific binding;GO:0140090//membrane curvature sensor activity	GO:0006836//neurotransmitter transport;GO:0050796//regulation of insulin secretion;GO:0051049//regulation of transport
ENST00000481527	ENSG00000003147	5.48x10⁻⁴	ACOX2-211	ICA1	GO:0000139//Golgi membrane;GO:0005737//cytoplasm;GO:0005794//Golgi apparatus;GO:0005829//cytosol;GO:0012505//endomembrane system;GO:0016020//membrane;GO:0016021//integral component of membrane;GO:0030054//cell junction;GO:0030658//transport vesicle membrane;GO:0030667//secretory granule membrane;GO:0030672//synaptic vesicle membrane;GO:0031410//cytoplasmic vesicle;GO:0043231//intracellular membra…	GO:0005515//protein binding;GO:0019904//protein domain specific binding;GO:0140090//membrane curvature sensor activity	GO:0006836//neurotransmitter transport;GO:0050796//regulation of insulin secretion;GO:0051049//regulation of transport
ENST00000482337	ENSG00000003147	1.80x10⁻³	KHDC4-208	ICA1	GO:0000139//Golgi membrane;GO:0005737//cytoplasm;GO:0005794//Golgi apparatus;GO:0005829//cytosol;GO:0012505//endomembrane system;GO:0016020//membrane;GO:0016021//integral component of membrane;GO:0030054//cell junction;GO:0030658//transport vesicle membrane;GO:0030667//secretory granule membrane;GO:0030672//synaptic vesicle membrane;GO:0031410//cytoplasmic vesicle;GO:0043231//intracellular membra…	GO:0005515//protein binding;GO:0019904//protein domain specific binding;GO:0140090//membrane curvature sensor activity	GO:0006836//neurotransmitter transport;GO:0050796//regulation of insulin secretion;GO:0051049//regulation of transport
ENST00000484270	ENSG00000003147	9.93x10⁻⁴	KHDRBS1-203	ICA1	GO:0000139//Golgi membrane;GO:0005737//cytoplasm;GO:0005794//Golgi apparatus;GO:0005829//cytosol;GO:0012505//endomembrane system;GO:0016020//membrane;GO:0016021//integral component of membrane;GO:0030054//cell junction;GO:0030658//transport vesicle membrane;GO:0030667//secretory granule membrane;GO:0030672//synaptic vesicle membrane;GO:0031410//cytoplasmic vesicle;GO:0043231//intracellular membra…	GO:0005515//protein binding;GO:0019904//protein domain specific binding;GO:0140090//membrane curvature sensor activity	GO:0006836//neurotransmitter transport;GO:0050796//regulation of insulin secretion;GO:0051049//regulation of transport
ENST00000485631	ENSG00000003147	3.02x10⁻³	BCL2L13-210	ICA1	GO:0000139//Golgi membrane;GO:0005737//cytoplasm;GO:0005794//Golgi apparatus;GO:0005829//cytosol;GO:0012505//endomembrane system;GO:0016020//membrane;GO:0016021//integral component of membrane;GO:0030054//cell junction;GO:0030658//transport vesicle membrane;GO:0030667//secretory granule membrane;GO:0030672//synaptic vesicle membrane;GO:0031410//cytoplasmic vesicle;GO:0043231//intracellular membra…	GO:0005515//protein binding;GO:0019904//protein domain specific binding;GO:0140090//membrane curvature sensor activity	GO:0006836//neurotransmitter transport;GO:0050796//regulation of insulin secretion;GO:0051049//regulation of transport
ENST00000487278	ENSG00000003147	2.28x10⁻³	ZSWIM8-210	ICA1	GO:0000139//Golgi membrane;GO:0005737//cytoplasm;GO:0005794//Golgi apparatus;GO:0005829//cytosol;GO:0012505//endomembrane system;GO:0016020//membrane;GO:0016021//integral component of membrane;GO:0030054//cell junction;GO:0030658//transport vesicle membrane;GO:0030667//secretory granule membrane;GO:0030672//synaptic vesicle membrane;GO:0031410//cytoplasmic vesicle;GO:0043231//intracellular membra…	GO:0005515//protein binding;GO:0019904//protein domain specific binding;GO:0140090//membrane curvature sensor activity	GO:0006836//neurotransmitter transport;GO:0050796//regulation of insulin secretion;GO:0051049//regulation of transport
ENST00000492135	ENSG00000003147	5.38x10⁻⁵	NOP56-216	ICA1	GO:0000139//Golgi membrane;GO:0005737//cytoplasm;GO:0005794//Golgi apparatus;GO:0005829//cytosol;GO:0012505//endomembrane system;GO:0016020//membrane;GO:0016021//integral component of membrane;GO:0030054//cell junction;GO:0030658//transport vesicle membrane;GO:0030667//secretory granule membrane;GO:0030672//synaptic vesicle membrane;GO:0031410//cytoplasmic vesicle;GO:0043231//intracellular membra…	GO:0005515//protein binding;GO:0019904//protein domain specific binding;GO:0140090//membrane curvature sensor activity	GO:0006836//neurotransmitter transport;GO:0050796//regulation of insulin secretion;GO:0051049//regulation of transport
ENST00000495714	ENSG00000003147	1.52x10⁻³	ANLN-213	ICA1	GO:0000139//Golgi membrane;GO:0005737//cytoplasm;GO:0005794//Golgi apparatus;GO:0005829//cytosol;GO:0012505//endomembrane system;GO:0016020//membrane;GO:0016021//integral component of membrane;GO:0030054//cell junction;GO:0030658//transport vesicle membrane;GO:0030667//secretory granule membrane;GO:0030672//synaptic vesicle membrane;GO:0031410//cytoplasmic vesicle;GO:0043231//intracellular membra…	GO:0005515//protein binding;GO:0019904//protein domain specific binding;GO:0140090//membrane curvature sensor activity	GO:0006836//neurotransmitter transport;GO:0050796//regulation of insulin secretion;GO:0051049//regulation of transport
ENST00000495841	ENSG00000003147	1.26x10⁻³	CAV2-214	ICA1	GO:0000139//Golgi membrane;GO:0005737//cytoplasm;GO:0005794//Golgi apparatus;GO:0005829//cytosol;GO:0012505//endomembrane system;GO:0016020//membrane;GO:0016021//integral component of membrane;GO:0030054//cell junction;GO:0030658//transport vesicle membrane;GO:0030667//secretory granule membrane;GO:0030672//synaptic vesicle membrane;GO:0031410//cytoplasmic vesicle;GO:0043231//intracellular membra…	GO:0005515//protein binding;GO:0019904//protein domain specific binding;GO:0140090//membrane curvature sensor activity	GO:0006836//neurotransmitter transport;GO:0050796//regulation of insulin secretion;GO:0051049//regulation of transport
ENST00000496857	ENSG00000003147	8.41x10⁻⁴	EHBP1-220	ICA1	GO:0000139//Golgi membrane;GO:0005737//cytoplasm;GO:0005794//Golgi apparatus;GO:0005829//cytosol;GO:0012505//endomembrane system;GO:0016020//membrane;GO:0016021//integral component of membrane;GO:0030054//cell junction;GO:0030658//transport vesicle membrane;GO:0030667//secretory granule membrane;GO:0030672//synaptic vesicle membrane;GO:0031410//cytoplasmic vesicle;GO:0043231//intracellular membra…	GO:0005515//protein binding;GO:0019904//protein domain specific binding;GO:0140090//membrane curvature sensor activity	GO:0006836//neurotransmitter transport;GO:0050796//regulation of insulin secretion;GO:0051049//regulation of transport
ENST00000504263	ENSG00000003147	2.38x10⁻³	PCAT4-201	ICA1	GO:0000139//Golgi membrane;GO:0005737//cytoplasm;GO:0005794//Golgi apparatus;GO:0005829//cytosol;GO:0012505//endomembrane system;GO:0016020//membrane;GO:0016021//integral component of membrane;GO:0030054//cell junction;GO:0030658//transport vesicle membrane;GO:0030667//secretory granule membrane;GO:0030672//synaptic vesicle membrane;GO:0031410//cytoplasmic vesicle;GO:0043231//intracellular membra…	GO:0005515//protein binding;GO:0019904//protein domain specific binding;GO:0140090//membrane curvature sensor activity	GO:0006836//neurotransmitter transport;GO:0050796//regulation of insulin secretion;GO:0051049//regulation of transport
ENST00000508785	ENSG00000003147	1.50x10⁻³	MACROH2A1-213	ICA1	GO:0000139//Golgi membrane;GO:0005737//cytoplasm;GO:0005794//Golgi apparatus;GO:0005829//cytosol;GO:0012505//endomembrane system;GO:0016020//membrane;GO:0016021//integral component of membrane;GO:0030054//cell junction;GO:0030658//transport vesicle membrane;GO:0030667//secretory granule membrane;GO:0030672//synaptic vesicle membrane;GO:0031410//cytoplasmic vesicle;GO:0043231//intracellular membra…	GO:0005515//protein binding;GO:0019904//protein domain specific binding;GO:0140090//membrane curvature sensor activity	GO:0006836//neurotransmitter transport;GO:0050796//regulation of insulin secretion;GO:0051049//regulation of transport
ENST00000515225	ENSG00000003147	1.69x10⁻³	DLC1-212	ICA1	GO:0000139//Golgi membrane;GO:0005737//cytoplasm;GO:0005794//Golgi apparatus;GO:0005829//cytosol;GO:0012505//endomembrane system;GO:0016020//membrane;GO:0016021//integral component of membrane;GO:0030054//cell junction;GO:0030658//transport vesicle membrane;GO:0030667//secretory granule membrane;GO:0030672//synaptic vesicle membrane;GO:0031410//cytoplasmic vesicle;GO:0043231//intracellular membra…	GO:0005515//protein binding;GO:0019904//protein domain specific binding;GO:0140090//membrane curvature sensor activity	GO:0006836//neurotransmitter transport;GO:0050796//regulation of insulin secretion;GO:0051049//regulation of transport
ENST00000518815	ENSG00000003147	2.13x10⁻³	MTCL1-206	ICA1	GO:0000139//Golgi membrane;GO:0005737//cytoplasm;GO:0005794//Golgi apparatus;GO:0005829//cytosol;GO:0012505//endomembrane system;GO:0016020//membrane;GO:0016021//integral component of membrane;GO:0030054//cell junction;GO:0030658//transport vesicle membrane;GO:0030667//secretory granule membrane;GO:0030672//synaptic vesicle membrane;GO:0031410//cytoplasmic vesicle;GO:0043231//intracellular membra…	GO:0005515//protein binding;GO:0019904//protein domain specific binding;GO:0140090//membrane curvature sensor activity	GO:0006836//neurotransmitter transport;GO:0050796//regulation of insulin secretion;GO:0051049//regulation of transport
ENST00000519571	ENSG00000003147	4.30x10⁻⁴	GALNT10-207	ICA1	GO:0000139//Golgi membrane;GO:0005737//cytoplasm;GO:0005794//Golgi apparatus;GO:0005829//cytosol;GO:0012505//endomembrane system;GO:0016020//membrane;GO:0016021//integral component of membrane;GO:0030054//cell junction;GO:0030658//transport vesicle membrane;GO:0030667//secretory granule membrane;GO:0030672//synaptic vesicle membrane;GO:0031410//cytoplasmic vesicle;GO:0043231//intracellular membra…	GO:0005515//protein binding;GO:0019904//protein domain specific binding;GO:0140090//membrane curvature sensor activity	GO:0006836//neurotransmitter transport;GO:0050796//regulation of insulin secretion;GO:0051049//regulation of transport
ENST00000544307	ENSG00000003147	8.33x10⁻⁴	PDE3A-203	ICA1	GO:0000139//Golgi membrane;GO:0005737//cytoplasm;GO:0005794//Golgi apparatus;GO:0005829//cytosol;GO:0012505//endomembrane system;GO:0016020//membrane;GO:0016021//integral component of membrane;GO:0030054//cell junction;GO:0030658//transport vesicle membrane;GO:0030667//secretory granule membrane;GO:0030672//synaptic vesicle membrane;GO:0031410//cytoplasmic vesicle;GO:0043231//intracellular membra…	GO:0005515//protein binding;GO:0019904//protein domain specific binding;GO:0140090//membrane curvature sensor activity	GO:0006836//neurotransmitter transport;GO:0050796//regulation of insulin secretion;GO:0051049//regulation of transport
ENST00000551988	ENSG00000003147	9.06x10⁻⁴	PAH-213	ICA1	GO:0000139//Golgi membrane;GO:0005737//cytoplasm;GO:0005794//Golgi apparatus;GO:0005829//cytosol;GO:0012505//endomembrane system;GO:0016020//membrane;GO:0016021//integral component of membrane;GO:0030054//cell junction;GO:0030658//transport vesicle membrane;GO:0030667//secretory granule membrane;GO:0030672//synaptic vesicle membrane;GO:0031410//cytoplasmic vesicle;GO:0043231//intracellular membra…	GO:0005515//protein binding;GO:0019904//protein domain specific binding;GO:0140090//membrane curvature sensor activity	GO:0006836//neurotransmitter transport;GO:0050796//regulation of insulin secretion;GO:0051049//regulation of transport
ENST00000553596	ENSG00000003147	2.37x10⁻³	ARHGAP5-AS1-201	ICA1	GO:0000139//Golgi membrane;GO:0005737//cytoplasm;GO:0005794//Golgi apparatus;GO:0005829//cytosol;GO:0012505//endomembrane system;GO:0016020//membrane;GO:0016021//integral component of membrane;GO:0030054//cell junction;GO:0030658//transport vesicle membrane;GO:0030667//secretory granule membrane;GO:0030672//synaptic vesicle membrane;GO:0031410//cytoplasmic vesicle;GO:0043231//intracellular membra…	GO:0005515//protein binding;GO:0019904//protein domain specific binding;GO:0140090//membrane curvature sensor activity	GO:0006836//neurotransmitter transport;GO:0050796//regulation of insulin secretion;GO:0051049//regulation of transport
ENST00000554295	ENSG00000003147	1.84x10⁻³	SLC9A7P1-201	ICA1	GO:0000139//Golgi membrane;GO:0005737//cytoplasm;GO:0005794//Golgi apparatus;GO:0005829//cytosol;GO:0012505//endomembrane system;GO:0016020//membrane;GO:0016021//integral component of membrane;GO:0030054//cell junction;GO:0030658//transport vesicle membrane;GO:0030667//secretory granule membrane;GO:0030672//synaptic vesicle membrane;GO:0031410//cytoplasmic vesicle;GO:0043231//intracellular membra…	GO:0005515//protein binding;GO:0019904//protein domain specific binding;GO:0140090//membrane curvature sensor activity	GO:0006836//neurotransmitter transport;GO:0050796//regulation of insulin secretion;GO:0051049//regulation of transport
ENST00000577038	ENSG00000003147	2.82x10⁻⁴	MMD-203	ICA1	GO:0000139//Golgi membrane;GO:0005737//cytoplasm;GO:0005794//Golgi apparatus;GO:0005829//cytosol;GO:0012505//endomembrane system;GO:0016020//membrane;GO:0016021//integral component of membrane;GO:0030054//cell junction;GO:0030658//transport vesicle membrane;GO:0030667//secretory granule membrane;GO:0030672//synaptic vesicle membrane;GO:0031410//cytoplasmic vesicle;GO:0043231//intracellular membra…	GO:0005515//protein binding;GO:0019904//protein domain specific binding;GO:0140090//membrane curvature sensor activity	GO:0006836//neurotransmitter transport;GO:0050796//regulation of insulin secretion;GO:0051049//regulation of transport
ENST00000584499	ENSG00000003147	2.73x10⁻³	-	ICA1	GO:0000139//Golgi membrane;GO:0005737//cytoplasm;GO:0005794//Golgi apparatus;GO:0005829//cytosol;GO:0012505//endomembrane system;GO:0016020//membrane;GO:0016021//integral component of membrane;GO:0030054//cell junction;GO:0030658//transport vesicle membrane;GO:0030667//secretory granule membrane;GO:0030672//synaptic vesicle membrane;GO:0031410//cytoplasmic vesicle;GO:0043231//intracellular membra…	GO:0005515//protein binding;GO:0019904//protein domain specific binding;GO:0140090//membrane curvature sensor activity	GO:0006836//neurotransmitter transport;GO:0050796//regulation of insulin secretion;GO:0051049//regulation of transport
ENST00000590440	ENSG00000003147	5.75x10⁻⁴	ADAMTSL5-208	ICA1	GO:0000139//Golgi membrane;GO:0005737//cytoplasm;GO:0005794//Golgi apparatus;GO:0005829//cytosol;GO:0012505//endomembrane system;GO:0016020//membrane;GO:0016021//integral component of membrane;GO:0030054//cell junction;GO:0030658//transport vesicle membrane;GO:0030667//secretory granule membrane;GO:0030672//synaptic vesicle membrane;GO:0031410//cytoplasmic vesicle;GO:0043231//intracellular membra…	GO:0005515//protein binding;GO:0019904//protein domain specific binding;GO:0140090//membrane curvature sensor activity	GO:0006836//neurotransmitter transport;GO:0050796//regulation of insulin secretion;GO:0051049//regulation of transport
ENST00000606242	ENSG00000003147	4.27x10⁻⁴	LINC01836-202	ICA1	GO:0000139//Golgi membrane;GO:0005737//cytoplasm;GO:0005794//Golgi apparatus;GO:0005829//cytosol;GO:0012505//endomembrane system;GO:0016020//membrane;GO:0016021//integral component of membrane;GO:0030054//cell junction;GO:0030658//transport vesicle membrane;GO:0030667//secretory granule membrane;GO:0030672//synaptic vesicle membrane;GO:0031410//cytoplasmic vesicle;GO:0043231//intracellular membra…	GO:0005515//protein binding;GO:0019904//protein domain specific binding;GO:0140090//membrane curvature sensor activity	GO:0006836//neurotransmitter transport;GO:0050796//regulation of insulin secretion;GO:0051049//regulation of transport
ENST00000616106	ENSG00000003147	1.25x10⁻³	-	ICA1	GO:0000139//Golgi membrane;GO:0005737//cytoplasm;GO:0005794//Golgi apparatus;GO:0005829//cytosol;GO:0012505//endomembrane system;GO:0016020//membrane;GO:0016021//integral component of membrane;GO:0030054//cell junction;GO:0030658//transport vesicle membrane;GO:0030667//secretory granule membrane;GO:0030672//synaptic vesicle membrane;GO:0031410//cytoplasmic vesicle;GO:0043231//intracellular membra…	GO:0005515//protein binding;GO:0019904//protein domain specific binding;GO:0140090//membrane curvature sensor activity	GO:0006836//neurotransmitter transport;GO:0050796//regulation of insulin secretion;GO:0051049//regulation of transport
ENST00000631190	ENSG00000003147	3.01x10⁻⁴	LINC00294-201	ICA1	GO:0000139//Golgi membrane;GO:0005737//cytoplasm;GO:0005794//Golgi apparatus;GO:0005829//cytosol;GO:0012505//endomembrane system;GO:0016020//membrane;GO:0016021//integral component of membrane;GO:0030054//cell junction;GO:0030658//transport vesicle membrane;GO:0030667//secretory granule membrane;GO:0030672//synaptic vesicle membrane;GO:0031410//cytoplasmic vesicle;GO:0043231//intracellular membra…	GO:0005515//protein binding;GO:0019904//protein domain specific binding;GO:0140090//membrane curvature sensor activity	GO:0006836//neurotransmitter transport;GO:0050796//regulation of insulin secretion;GO:0051049//regulation of transport
ENST00000643920	ENSG00000003147	3.13x10⁻³	TUG1-215	ICA1	GO:0000139//Golgi membrane;GO:0005737//cytoplasm;GO:0005794//Golgi apparatus;GO:0005829//cytosol;GO:0012505//endomembrane system;GO:0016020//membrane;GO:0016021//integral component of membrane;GO:0030054//cell junction;GO:0030658//transport vesicle membrane;GO:0030667//secretory granule membrane;GO:0030672//synaptic vesicle membrane;GO:0031410//cytoplasmic vesicle;GO:0043231//intracellular membra…	GO:0005515//protein binding;GO:0019904//protein domain specific binding;GO:0140090//membrane curvature sensor activity	GO:0006836//neurotransmitter transport;GO:0050796//regulation of insulin secretion;GO:0051049//regulation of transport
ENST00000644505	ENSG00000003147	1.39x10⁻³	MICAL2-232	ICA1	GO:0000139//Golgi membrane;GO:0005737//cytoplasm;GO:0005794//Golgi apparatus;GO:0005829//cytosol;GO:0012505//endomembrane system;GO:0016020//membrane;GO:0016021//integral component of membrane;GO:0030054//cell junction;GO:0030658//transport vesicle membrane;GO:0030667//secretory granule membrane;GO:0030672//synaptic vesicle membrane;GO:0031410//cytoplasmic vesicle;GO:0043231//intracellular membra…	GO:0005515//protein binding;GO:0019904//protein domain specific binding;GO:0140090//membrane curvature sensor activity	GO:0006836//neurotransmitter transport;GO:0050796//regulation of insulin secretion;GO:0051049//regulation of transport
ENST00000649789	ENSG00000003147	8.01x10⁻⁴	-	ICA1	GO:0000139//Golgi membrane;GO:0005737//cytoplasm;GO:0005794//Golgi apparatus;GO:0005829//cytosol;GO:0012505//endomembrane system;GO:0016020//membrane;GO:0016021//integral component of membrane;GO:0030054//cell junction;GO:0030658//transport vesicle membrane;GO:0030667//secretory granule membrane;GO:0030672//synaptic vesicle membrane;GO:0031410//cytoplasmic vesicle;GO:0043231//intracellular membra…	GO:0005515//protein binding;GO:0019904//protein domain specific binding;GO:0140090//membrane curvature sensor activity	GO:0006836//neurotransmitter transport;GO:0050796//regulation of insulin secretion;GO:0051049//regulation of transport
ENST00000654389	ENSG00000003147	1.46x10⁻³	SNHG17-218	ICA1	GO:0000139//Golgi membrane;GO:0005737//cytoplasm;GO:0005794//Golgi apparatus;GO:0005829//cytosol;GO:0012505//endomembrane system;GO:0016020//membrane;GO:0016021//integral component of membrane;GO:0030054//cell junction;GO:0030658//transport vesicle membrane;GO:0030667//secretory granule membrane;GO:0030672//synaptic vesicle membrane;GO:0031410//cytoplasmic vesicle;GO:0043231//intracellular membra…	GO:0005515//protein binding;GO:0019904//protein domain specific binding;GO:0140090//membrane curvature sensor activity	GO:0006836//neurotransmitter transport;GO:0050796//regulation of insulin secretion;GO:0051049//regulation of transport
ENST00000659781	ENSG00000003147	3.23x10⁻³	LINC02432-207	ICA1	GO:0000139//Golgi membrane;GO:0005737//cytoplasm;GO:0005794//Golgi apparatus;GO:0005829//cytosol;GO:0012505//endomembrane system;GO:0016020//membrane;GO:0016021//integral component of membrane;GO:0030054//cell junction;GO:0030658//transport vesicle membrane;GO:0030667//secretory granule membrane;GO:0030672//synaptic vesicle membrane;GO:0031410//cytoplasmic vesicle;GO:0043231//intracellular membra…	GO:0005515//protein binding;GO:0019904//protein domain specific binding;GO:0140090//membrane curvature sensor activity	GO:0006836//neurotransmitter transport;GO:0050796//regulation of insulin secretion;GO:0051049//regulation of transport
ENST00000667119	ENSG00000003147	1.08x10⁻³	SNHG15-212	ICA1	GO:0000139//Golgi membrane;GO:0005737//cytoplasm;GO:0005794//Golgi apparatus;GO:0005829//cytosol;GO:0012505//endomembrane system;GO:0016020//membrane;GO:0016021//integral component of membrane;GO:0030054//cell junction;GO:0030658//transport vesicle membrane;GO:0030667//secretory granule membrane;GO:0030672//synaptic vesicle membrane;GO:0031410//cytoplasmic vesicle;GO:0043231//intracellular membra…	GO:0005515//protein binding;GO:0019904//protein domain specific binding;GO:0140090//membrane curvature sensor activity	GO:0006836//neurotransmitter transport;GO:0050796//regulation of insulin secretion;GO:0051049//regulation of transport
ENST00000683492	ENSG00000003147	1.10x10⁻³	ZNF107-209	ICA1	GO:0000139//Golgi membrane;GO:0005737//cytoplasm;GO:0005794//Golgi apparatus;GO:0005829//cytosol;GO:0012505//endomembrane system;GO:0016020//membrane;GO:0016021//integral component of membrane;GO:0030054//cell junction;GO:0030658//transport vesicle membrane;GO:0030667//secretory granule membrane;GO:0030672//synaptic vesicle membrane;GO:0031410//cytoplasmic vesicle;GO:0043231//intracellular membra…	GO:0005515//protein binding;GO:0019904//protein domain specific binding;GO:0140090//membrane curvature sensor activity	GO:0006836//neurotransmitter transport;GO:0050796//regulation of insulin secretion;GO:0051049//regulation of transport
ENST00000687035	ENSG00000003147	1.42x10⁻⁴	-	ICA1	GO:0000139//Golgi membrane;GO:0005737//cytoplasm;GO:0005794//Golgi apparatus;GO:0005829//cytosol;GO:0012505//endomembrane system;GO:0016020//membrane;GO:0016021//integral component of membrane;GO:0030054//cell junction;GO:0030658//transport vesicle membrane;GO:0030667//secretory granule membrane;GO:0030672//synaptic vesicle membrane;GO:0031410//cytoplasmic vesicle;GO:0043231//intracellular membra…	GO:0005515//protein binding;GO:0019904//protein domain specific binding;GO:0140090//membrane curvature sensor activity	GO:0006836//neurotransmitter transport;GO:0050796//regulation of insulin secretion;GO:0051049//regulation of transport
ENST00000687575	ENSG00000003147	1.42x10⁻⁴	-	ICA1	GO:0000139//Golgi membrane;GO:0005737//cytoplasm;GO:0005794//Golgi apparatus;GO:0005829//cytosol;GO:0012505//endomembrane system;GO:0016020//membrane;GO:0016021//integral component of membrane;GO:0030054//cell junction;GO:0030658//transport vesicle membrane;GO:0030667//secretory granule membrane;GO:0030672//synaptic vesicle membrane;GO:0031410//cytoplasmic vesicle;GO:0043231//intracellular membra…	GO:0005515//protein binding;GO:0019904//protein domain specific binding;GO:0140090//membrane curvature sensor activity	GO:0006836//neurotransmitter transport;GO:0050796//regulation of insulin secretion;GO:0051049//regulation of transport
MSTRG.14210.2	ENSG00000003147	3.35x10⁻³	-	ICA1	GO:0000139//Golgi membrane;GO:0005737//cytoplasm;GO:0005794//Golgi apparatus;GO:0005829//cytosol;GO:0012505//endomembrane system;GO:0016020//membrane;GO:0016021//integral component of membrane;GO:0030054//cell junction;GO:0030658//transport vesicle membrane;GO:0030667//secretory granule membrane;GO:0030672//synaptic vesicle membrane;GO:0031410//cytoplasmic vesicle;GO:0043231//intracellular membra…	GO:0005515//protein binding;GO:0019904//protein domain specific binding;GO:0140090//membrane curvature sensor activity	GO:0006836//neurotransmitter transport;GO:0050796//regulation of insulin secretion;GO:0051049//regulation of transport
MSTRG.14740.4	ENSG00000003147	2.87x10⁻⁴	-	ICA1	GO:0000139//Golgi membrane;GO:0005737//cytoplasm;GO:0005794//Golgi apparatus;GO:0005829//cytosol;GO:0012505//endomembrane system;GO:0016020//membrane;GO:0016021//integral component of membrane;GO:0030054//cell junction;GO:0030658//transport vesicle membrane;GO:0030667//secretory granule membrane;GO:0030672//synaptic vesicle membrane;GO:0031410//cytoplasmic vesicle;GO:0043231//intracellular membra…	GO:0005515//protein binding;GO:0019904//protein domain specific binding;GO:0140090//membrane curvature sensor activity	GO:0006836//neurotransmitter transport;GO:0050796//regulation of insulin secretion;GO:0051049//regulation of transport
MSTRG.16535.1	ENSG00000003147	9.49x10⁻⁴	-	ICA1	GO:0000139//Golgi membrane;GO:0005737//cytoplasm;GO:0005794//Golgi apparatus;GO:0005829//cytosol;GO:0012505//endomembrane system;GO:0016020//membrane;GO:0016021//integral component of membrane;GO:0030054//cell junction;GO:0030658//transport vesicle membrane;GO:0030667//secretory granule membrane;GO:0030672//synaptic vesicle membrane;GO:0031410//cytoplasmic vesicle;GO:0043231//intracellular membra…	GO:0005515//protein binding;GO:0019904//protein domain specific binding;GO:0140090//membrane curvature sensor activity	GO:0006836//neurotransmitter transport;GO:0050796//regulation of insulin secretion;GO:0051049//regulation of transport
MSTRG.19229.3	ENSG00000003147	2.14x10⁻³	-	ICA1	GO:0000139//Golgi membrane;GO:0005737//cytoplasm;GO:0005794//Golgi apparatus;GO:0005829//cytosol;GO:0012505//endomembrane system;GO:0016020//membrane;GO:0016021//integral component of membrane;GO:0030054//cell junction;GO:0030658//transport vesicle membrane;GO:0030667//secretory granule membrane;GO:0030672//synaptic vesicle membrane;GO:0031410//cytoplasmic vesicle;GO:0043231//intracellular membra…	GO:0005515//protein binding;GO:0019904//protein domain specific binding;GO:0140090//membrane curvature sensor activity	GO:0006836//neurotransmitter transport;GO:0050796//regulation of insulin secretion;GO:0051049//regulation of transport
MSTRG.19288.1	ENSG00000003147	9.35x10⁻⁵	-	ICA1	GO:0000139//Golgi membrane;GO:0005737//cytoplasm;GO:0005794//Golgi apparatus;GO:0005829//cytosol;GO:0012505//endomembrane system;GO:0016020//membrane;GO:0016021//integral component of membrane;GO:0030054//cell junction;GO:0030658//transport vesicle membrane;GO:0030667//secretory granule membrane;GO:0030672//synaptic vesicle membrane;GO:0031410//cytoplasmic vesicle;GO:0043231//intracellular membra…	GO:0005515//protein binding;GO:0019904//protein domain specific binding;GO:0140090//membrane curvature sensor activity	GO:0006836//neurotransmitter transport;GO:0050796//regulation of insulin secretion;GO:0051049//regulation of transport
MSTRG.19288.2	ENSG00000003147	3.58x10⁻³	-	ICA1	GO:0000139//Golgi membrane;GO:0005737//cytoplasm;GO:0005794//Golgi apparatus;GO:0005829//cytosol;GO:0012505//endomembrane system;GO:0016020//membrane;GO:0016021//integral component of membrane;GO:0030054//cell junction;GO:0030658//transport vesicle membrane;GO:0030667//secretory granule membrane;GO:0030672//synaptic vesicle membrane;GO:0031410//cytoplasmic vesicle;GO:0043231//intracellular membra…	GO:0005515//protein binding;GO:0019904//protein domain specific binding;GO:0140090//membrane curvature sensor activity	GO:0006836//neurotransmitter transport;GO:0050796//regulation of insulin secretion;GO:0051049//regulation of transport
MSTRG.19832.3	ENSG00000003147	9.47x10⁻⁴	-	ICA1	GO:0000139//Golgi membrane;GO:0005737//cytoplasm;GO:0005794//Golgi apparatus;GO:0005829//cytosol;GO:0012505//endomembrane system;GO:0016020//membrane;GO:0016021//integral component of membrane;GO:0030054//cell junction;GO:0030658//transport vesicle membrane;GO:0030667//secretory granule membrane;GO:0030672//synaptic vesicle membrane;GO:0031410//cytoplasmic vesicle;GO:0043231//intracellular membra…	GO:0005515//protein binding;GO:0019904//protein domain specific binding;GO:0140090//membrane curvature sensor activity	GO:0006836//neurotransmitter transport;GO:0050796//regulation of insulin secretion;GO:0051049//regulation of transport
MSTRG.20287.2	ENSG00000003147	1.67x10⁻³	-	ICA1	GO:0000139//Golgi membrane;GO:0005737//cytoplasm;GO:0005794//Golgi apparatus;GO:0005829//cytosol;GO:0012505//endomembrane system;GO:0016020//membrane;GO:0016021//integral component of membrane;GO:0030054//cell junction;GO:0030658//transport vesicle membrane;GO:0030667//secretory granule membrane;GO:0030672//synaptic vesicle membrane;GO:0031410//cytoplasmic vesicle;GO:0043231//intracellular membra…	GO:0005515//protein binding;GO:0019904//protein domain specific binding;GO:0140090//membrane curvature sensor activity	GO:0006836//neurotransmitter transport;GO:0050796//regulation of insulin secretion;GO:0051049//regulation of transport
MSTRG.20291.1	ENSG00000003147	7.86x10⁻⁴	-	ICA1	GO:0000139//Golgi membrane;GO:0005737//cytoplasm;GO:0005794//Golgi apparatus;GO:0005829//cytosol;GO:0012505//endomembrane system;GO:0016020//membrane;GO:0016021//integral component of membrane;GO:0030054//cell junction;GO:0030658//transport vesicle membrane;GO:0030667//secretory granule membrane;GO:0030672//synaptic vesicle membrane;GO:0031410//cytoplasmic vesicle;GO:0043231//intracellular membra…	GO:0005515//protein binding;GO:0019904//protein domain specific binding;GO:0140090//membrane curvature sensor activity	GO:0006836//neurotransmitter transport;GO:0050796//regulation of insulin secretion;GO:0051049//regulation of transport
MSTRG.25888.1	ENSG00000003147	1.25x10⁻³	-	ICA1	GO:0000139//Golgi membrane;GO:0005737//cytoplasm;GO:0005794//Golgi apparatus;GO:0005829//cytosol;GO:0012505//endomembrane system;GO:0016020//membrane;GO:0016021//integral component of membrane;GO:0030054//cell junction;GO:0030658//transport vesicle membrane;GO:0030667//secretory granule membrane;GO:0030672//synaptic vesicle membrane;GO:0031410//cytoplasmic vesicle;GO:0043231//intracellular membra…	GO:0005515//protein binding;GO:0019904//protein domain specific binding;GO:0140090//membrane curvature sensor activity	GO:0006836//neurotransmitter transport;GO:0050796//regulation of insulin secretion;GO:0051049//regulation of transport
MSTRG.2870.10	ENSG00000003147	1.07x10⁻³	-	ICA1	GO:0000139//Golgi membrane;GO:0005737//cytoplasm;GO:0005794//Golgi apparatus;GO:0005829//cytosol;GO:0012505//endomembrane system;GO:0016020//membrane;GO:0016021//integral component of membrane;GO:0030054//cell junction;GO:0030658//transport vesicle membrane;GO:0030667//secretory granule membrane;GO:0030672//synaptic vesicle membrane;GO:0031410//cytoplasmic vesicle;GO:0043231//intracellular membra…	GO:0005515//protein binding;GO:0019904//protein domain specific binding;GO:0140090//membrane curvature sensor activity	GO:0006836//neurotransmitter transport;GO:0050796//regulation of insulin secretion;GO:0051049//regulation of transport
MSTRG.484.6	ENSG00000003147	2.57x10⁻³	-	ICA1	GO:0000139//Golgi membrane;GO:0005737//cytoplasm;GO:0005794//Golgi apparatus;GO:0005829//cytosol;GO:0012505//endomembrane system;GO:0016020//membrane;GO:0016021//integral component of membrane;GO:0030054//cell junction;GO:0030658//transport vesicle membrane;GO:0030667//secretory granule membrane;GO:0030672//synaptic vesicle membrane;GO:0031410//cytoplasmic vesicle;GO:0043231//intracellular membra…	GO:0005515//protein binding;GO:0019904//protein domain specific binding;GO:0140090//membrane curvature sensor activity	GO:0006836//neurotransmitter transport;GO:0050796//regulation of insulin secretion;GO:0051049//regulation of transport
ENST00000343528	ENSG00000003436	2.83x10⁻³	PDXK-203	TFPI	GO:0005576//extracellular region;GO:0005615//extracellular space;GO:0005783//endoplasmic reticulum;GO:0005886//plasma membrane;GO:0005901//caveola;GO:0009986//cell surface;GO:0016020//membrane;GO:0031225//anchored component of membrane;GO:0043231//intracellular membrane-bounded organelle	GO:0004866//endopeptidase inhibitor activity;GO:0004867//serine-type endopeptidase inhibitor activity;GO:0030414//peptidase inhibitor activity	GO:0007596//blood coagulation;GO:0007599//hemostasis;GO:0010466//negative regulation of peptidase activity;GO:0010951//negative regulation of endopeptidase activity;GO:0030195//negative regulation of blood coagulation;GO:0071383//cellular response to steroid hormone stimulus
ENST00000391874	ENSG00000003436	1.30x10⁻³	ENAH-205	TFPI	GO:0005576//extracellular region;GO:0005615//extracellular space;GO:0005783//endoplasmic reticulum;GO:0005886//plasma membrane;GO:0005901//caveola;GO:0009986//cell surface;GO:0016020//membrane;GO:0031225//anchored component of membrane;GO:0043231//intracellular membrane-bounded organelle	GO:0004866//endopeptidase inhibitor activity;GO:0004867//serine-type endopeptidase inhibitor activity;GO:0030414//peptidase inhibitor activity	GO:0007596//blood coagulation;GO:0007599//hemostasis;GO:0010466//negative regulation of peptidase activity;GO:0010951//negative regulation of endopeptidase activity;GO:0030195//negative regulation of blood coagulation;GO:0071383//cellular response to steroid hormone stimulus
ENST00000455909	ENSG00000003436	2.74x10⁻³	FKBP9P1-202	TFPI	GO:0005576//extracellular region;GO:0005615//extracellular space;GO:0005783//endoplasmic reticulum;GO:0005886//plasma membrane;GO:0005901//caveola;GO:0009986//cell surface;GO:0016020//membrane;GO:0031225//anchored component of membrane;GO:0043231//intracellular membrane-bounded organelle	GO:0004866//endopeptidase inhibitor activity;GO:0004867//serine-type endopeptidase inhibitor activity;GO:0030414//peptidase inhibitor activity	GO:0007596//blood coagulation;GO:0007599//hemostasis;GO:0010466//negative regulation of peptidase activity;GO:0010951//negative regulation of endopeptidase activity;GO:0030195//negative regulation of blood coagulation;GO:0071383//cellular response to steroid hormone stimulus
ENST00000464481	ENSG00000003436	2.80x10⁻⁴	SPIRE1-208	TFPI	GO:0005576//extracellular region;GO:0005615//extracellular space;GO:0005783//endoplasmic reticulum;GO:0005886//plasma membrane;GO:0005901//caveola;GO:0009986//cell surface;GO:0016020//membrane;GO:0031225//anchored component of membrane;GO:0043231//intracellular membrane-bounded organelle	GO:0004866//endopeptidase inhibitor activity;GO:0004867//serine-type endopeptidase inhibitor activity;GO:0030414//peptidase inhibitor activity	GO:0007596//blood coagulation;GO:0007599//hemostasis;GO:0010466//negative regulation of peptidase activity;GO:0010951//negative regulation of endopeptidase activity;GO:0030195//negative regulation of blood coagulation;GO:0071383//cellular response to steroid hormone stimulus
ENST00000466496	ENSG00000003436	3.43x10⁻³	MTMR11-203	TFPI	GO:0005576//extracellular region;GO:0005615//extracellular space;GO:0005783//endoplasmic reticulum;GO:0005886//plasma membrane;GO:0005901//caveola;GO:0009986//cell surface;GO:0016020//membrane;GO:0031225//anchored component of membrane;GO:0043231//intracellular membrane-bounded organelle	GO:0004866//endopeptidase inhibitor activity;GO:0004867//serine-type endopeptidase inhibitor activity;GO:0030414//peptidase inhibitor activity	GO:0007596//blood coagulation;GO:0007599//hemostasis;GO:0010466//negative regulation of peptidase activity;GO:0010951//negative regulation of endopeptidase activity;GO:0030195//negative regulation of blood coagulation;GO:0071383//cellular response to steroid hormone stimulus
ENST00000470643	ENSG00000003436	3.18x10⁻³	FLOT1-208	TFPI	GO:0005576//extracellular region;GO:0005615//extracellular space;GO:0005783//endoplasmic reticulum;GO:0005886//plasma membrane;GO:0005901//caveola;GO:0009986//cell surface;GO:0016020//membrane;GO:0031225//anchored component of membrane;GO:0043231//intracellular membrane-bounded organelle	GO:0004866//endopeptidase inhibitor activity;GO:0004867//serine-type endopeptidase inhibitor activity;GO:0030414//peptidase inhibitor activity	GO:0007596//blood coagulation;GO:0007599//hemostasis;GO:0010466//negative regulation of peptidase activity;GO:0010951//negative regulation of endopeptidase activity;GO:0030195//negative regulation of blood coagulation;GO:0071383//cellular response to steroid hormone stimulus
ENST00000472052	ENSG00000003436	1.15x10⁻³	ACAT2-203	TFPI	GO:0005576//extracellular region;GO:0005615//extracellular space;GO:0005783//endoplasmic reticulum;GO:0005886//plasma membrane;GO:0005901//caveola;GO:0009986//cell surface;GO:0016020//membrane;GO:0031225//anchored component of membrane;GO:0043231//intracellular membrane-bounded organelle	GO:0004866//endopeptidase inhibitor activity;GO:0004867//serine-type endopeptidase inhibitor activity;GO:0030414//peptidase inhibitor activity	GO:0007596//blood coagulation;GO:0007599//hemostasis;GO:0010466//negative regulation of peptidase activity;GO:0010951//negative regulation of endopeptidase activity;GO:0030195//negative regulation of blood coagulation;GO:0071383//cellular response to steroid hormone stimulus
ENST00000476100	ENSG00000003436	2.00x10⁻⁴	AKR1C1-204	TFPI	GO:0005576//extracellular region;GO:0005615//extracellular space;GO:0005783//endoplasmic reticulum;GO:0005886//plasma membrane;GO:0005901//caveola;GO:0009986//cell surface;GO:0016020//membrane;GO:0031225//anchored component of membrane;GO:0043231//intracellular membrane-bounded organelle	GO:0004866//endopeptidase inhibitor activity;GO:0004867//serine-type endopeptidase inhibitor activity;GO:0030414//peptidase inhibitor activity	GO:0007596//blood coagulation;GO:0007599//hemostasis;GO:0010466//negative regulation of peptidase activity;GO:0010951//negative regulation of endopeptidase activity;GO:0030195//negative regulation of blood coagulation;GO:0071383//cellular response to steroid hormone stimulus
ENST00000477661	ENSG00000003436	5.33x10⁻⁴	AKR1C1-205	TFPI	GO:0005576//extracellular region;GO:0005615//extracellular space;GO:0005783//endoplasmic reticulum;GO:0005886//plasma membrane;GO:0005901//caveola;GO:0009986//cell surface;GO:0016020//membrane;GO:0031225//anchored component of membrane;GO:0043231//intracellular membrane-bounded organelle	GO:0004866//endopeptidase inhibitor activity;GO:0004867//serine-type endopeptidase inhibitor activity;GO:0030414//peptidase inhibitor activity	GO:0007596//blood coagulation;GO:0007599//hemostasis;GO:0010466//negative regulation of peptidase activity;GO:0010951//negative regulation of endopeptidase activity;GO:0030195//negative regulation of blood coagulation;GO:0071383//cellular response to steroid hormone stimulus
ENST00000478651	ENSG00000003436	2.46x10⁻³	SLCO2A1-205	TFPI	GO:0005576//extracellular region;GO:0005615//extracellular space;GO:0005783//endoplasmic reticulum;GO:0005886//plasma membrane;GO:0005901//caveola;GO:0009986//cell surface;GO:0016020//membrane;GO:0031225//anchored component of membrane;GO:0043231//intracellular membrane-bounded organelle	GO:0004866//endopeptidase inhibitor activity;GO:0004867//serine-type endopeptidase inhibitor activity;GO:0030414//peptidase inhibitor activity	GO:0007596//blood coagulation;GO:0007599//hemostasis;GO:0010466//negative regulation of peptidase activity;GO:0010951//negative regulation of endopeptidase activity;GO:0030195//negative regulation of blood coagulation;GO:0071383//cellular response to steroid hormone stimulus
ENST00000479053	ENSG00000003436	3.22x10⁻³	RECK-203	TFPI	GO:0005576//extracellular region;GO:0005615//extracellular space;GO:0005783//endoplasmic reticulum;GO:0005886//plasma membrane;GO:0005901//caveola;GO:0009986//cell surface;GO:0016020//membrane;GO:0031225//anchored component of membrane;GO:0043231//intracellular membrane-bounded organelle	GO:0004866//endopeptidase inhibitor activity;GO:0004867//serine-type endopeptidase inhibitor activity;GO:0030414//peptidase inhibitor activity	GO:0007596//blood coagulation;GO:0007599//hemostasis;GO:0010466//negative regulation of peptidase activity;GO:0010951//negative regulation of endopeptidase activity;GO:0030195//negative regulation of blood coagulation;GO:0071383//cellular response to steroid hormone stimulus
ENST00000480212	ENSG00000003436	9.50x10⁻⁴	CD302-203	TFPI	GO:0005576//extracellular region;GO:0005615//extracellular space;GO:0005783//endoplasmic reticulum;GO:0005886//plasma membrane;GO:0005901//caveola;GO:0009986//cell surface;GO:0016020//membrane;GO:0031225//anchored component of membrane;GO:0043231//intracellular membrane-bounded organelle	GO:0004866//endopeptidase inhibitor activity;GO:0004867//serine-type endopeptidase inhibitor activity;GO:0030414//peptidase inhibitor activity	GO:0007596//blood coagulation;GO:0007599//hemostasis;GO:0010466//negative regulation of peptidase activity;GO:0010951//negative regulation of endopeptidase activity;GO:0030195//negative regulation of blood coagulation;GO:0071383//cellular response to steroid hormone stimulus
ENST00000481527	ENSG00000003436	1.33x10⁻³	ACOX2-211	TFPI	GO:0005576//extracellular region;GO:0005615//extracellular space;GO:0005783//endoplasmic reticulum;GO:0005886//plasma membrane;GO:0005901//caveola;GO:0009986//cell surface;GO:0016020//membrane;GO:0031225//anchored component of membrane;GO:0043231//intracellular membrane-bounded organelle	GO:0004866//endopeptidase inhibitor activity;GO:0004867//serine-type endopeptidase inhibitor activity;GO:0030414//peptidase inhibitor activity	GO:0007596//blood coagulation;GO:0007599//hemostasis;GO:0010466//negative regulation of peptidase activity;GO:0010951//negative regulation of endopeptidase activity;GO:0030195//negative regulation of blood coagulation;GO:0071383//cellular response to steroid hormone stimulus
ENST00000482337	ENSG00000003436	3.52x10⁻³	KHDC4-208	TFPI	GO:0005576//extracellular region;GO:0005615//extracellular space;GO:0005783//endoplasmic reticulum;GO:0005886//plasma membrane;GO:0005901//caveola;GO:0009986//cell surface;GO:0016020//membrane;GO:0031225//anchored component of membrane;GO:0043231//intracellular membrane-bounded organelle	GO:0004866//endopeptidase inhibitor activity;GO:0004867//serine-type endopeptidase inhibitor activity;GO:0030414//peptidase inhibitor activity	GO:0007596//blood coagulation;GO:0007599//hemostasis;GO:0010466//negative regulation of peptidase activity;GO:0010951//negative regulation of endopeptidase activity;GO:0030195//negative regulation of blood coagulation;GO:0071383//cellular response to steroid hormone stimulus
ENST00000485631	ENSG00000003436	1.85x10⁻³	BCL2L13-210	TFPI	GO:0005576//extracellular region;GO:0005615//extracellular space;GO:0005783//endoplasmic reticulum;GO:0005886//plasma membrane;GO:0005901//caveola;GO:0009986//cell surface;GO:0016020//membrane;GO:0031225//anchored component of membrane;GO:0043231//intracellular membrane-bounded organelle	GO:0004866//endopeptidase inhibitor activity;GO:0004867//serine-type endopeptidase inhibitor activity;GO:0030414//peptidase inhibitor activity	GO:0007596//blood coagulation;GO:0007599//hemostasis;GO:0010466//negative regulation of peptidase activity;GO:0010951//negative regulation of endopeptidase activity;GO:0030195//negative regulation of blood coagulation;GO:0071383//cellular response to steroid hormone stimulus
ENST00000487278	ENSG00000003436	2.25x10⁻³	ZSWIM8-210	TFPI	GO:0005576//extracellular region;GO:0005615//extracellular space;GO:0005783//endoplasmic reticulum;GO:0005886//plasma membrane;GO:0005901//caveola;GO:0009986//cell surface;GO:0016020//membrane;GO:0031225//anchored component of membrane;GO:0043231//intracellular membrane-bounded organelle	GO:0004866//endopeptidase inhibitor activity;GO:0004867//serine-type endopeptidase inhibitor activity;GO:0030414//peptidase inhibitor activity	GO:0007596//blood coagulation;GO:0007599//hemostasis;GO:0010466//negative regulation of peptidase activity;GO:0010951//negative regulation of endopeptidase activity;GO:0030195//negative regulation of blood coagulation;GO:0071383//cellular response to steroid hormone stimulus
ENST00000491958	ENSG00000003436	1.12x10⁻³	SELENOM-208	TFPI	GO:0005576//extracellular region;GO:0005615//extracellular space;GO:0005783//endoplasmic reticulum;GO:0005886//plasma membrane;GO:0005901//caveola;GO:0009986//cell surface;GO:0016020//membrane;GO:0031225//anchored component of membrane;GO:0043231//intracellular membrane-bounded organelle	GO:0004866//endopeptidase inhibitor activity;GO:0004867//serine-type endopeptidase inhibitor activity;GO:0030414//peptidase inhibitor activity	GO:0007596//blood coagulation;GO:0007599//hemostasis;GO:0010466//negative regulation of peptidase activity;GO:0010951//negative regulation of endopeptidase activity;GO:0030195//negative regulation of blood coagulation;GO:0071383//cellular response to steroid hormone stimulus
ENST00000492135	ENSG00000003436	3.37x10⁻³	NOP56-216	TFPI	GO:0005576//extracellular region;GO:0005615//extracellular space;GO:0005783//endoplasmic reticulum;GO:0005886//plasma membrane;GO:0005901//caveola;GO:0009986//cell surface;GO:0016020//membrane;GO:0031225//anchored component of membrane;GO:0043231//intracellular membrane-bounded organelle	GO:0004866//endopeptidase inhibitor activity;GO:0004867//serine-type endopeptidase inhibitor activity;GO:0030414//peptidase inhibitor activity	GO:0007596//blood coagulation;GO:0007599//hemostasis;GO:0010466//negative regulation of peptidase activity;GO:0010951//negative regulation of endopeptidase activity;GO:0030195//negative regulation of blood coagulation;GO:0071383//cellular response to steroid hormone stimulus
ENST00000493523	ENSG00000003436	2.38x10⁻³	RAB11FIP5-206	TFPI	GO:0005576//extracellular region;GO:0005615//extracellular space;GO:0005783//endoplasmic reticulum;GO:0005886//plasma membrane;GO:0005901//caveola;GO:0009986//cell surface;GO:0016020//membrane;GO:0031225//anchored component of membrane;GO:0043231//intracellular membrane-bounded organelle	GO:0004866//endopeptidase inhibitor activity;GO:0004867//serine-type endopeptidase inhibitor activity;GO:0030414//peptidase inhibitor activity	GO:0007596//blood coagulation;GO:0007599//hemostasis;GO:0010466//negative regulation of peptidase activity;GO:0010951//negative regulation of endopeptidase activity;GO:0030195//negative regulation of blood coagulation;GO:0071383//cellular response to steroid hormone stimulus
ENST00000495714	ENSG00000003436	3.09x10⁻³	ANLN-213	TFPI	GO:0005576//extracellular region;GO:0005615//extracellular space;GO:0005783//endoplasmic reticulum;GO:0005886//plasma membrane;GO:0005901//caveola;GO:0009986//cell surface;GO:0016020//membrane;GO:0031225//anchored component of membrane;GO:0043231//intracellular membrane-bounded organelle	GO:0004866//endopeptidase inhibitor activity;GO:0004867//serine-type endopeptidase inhibitor activity;GO:0030414//peptidase inhibitor activity	GO:0007596//blood coagulation;GO:0007599//hemostasis;GO:0010466//negative regulation of peptidase activity;GO:0010951//negative regulation of endopeptidase activity;GO:0030195//negative regulation of blood coagulation;GO:0071383//cellular response to steroid hormone stimulus
ENST00000497322	ENSG00000003436	3.45x10⁻⁴	RPL12-203	TFPI	GO:0005576//extracellular region;GO:0005615//extracellular space;GO:0005783//endoplasmic reticulum;GO:0005886//plasma membrane;GO:0005901//caveola;GO:0009986//cell surface;GO:0016020//membrane;GO:0031225//anchored component of membrane;GO:0043231//intracellular membrane-bounded organelle	GO:0004866//endopeptidase inhibitor activity;GO:0004867//serine-type endopeptidase inhibitor activity;GO:0030414//peptidase inhibitor activity	GO:0007596//blood coagulation;GO:0007599//hemostasis;GO:0010466//negative regulation of peptidase activity;GO:0010951//negative regulation of endopeptidase activity;GO:0030195//negative regulation of blood coagulation;GO:0071383//cellular response to steroid hormone stimulus
ENST00000504263	ENSG00000003436	2.83x10⁻³	PCAT4-201	TFPI	GO:0005576//extracellular region;GO:0005615//extracellular space;GO:0005783//endoplasmic reticulum;GO:0005886//plasma membrane;GO:0005901//caveola;GO:0009986//cell surface;GO:0016020//membrane;GO:0031225//anchored component of membrane;GO:0043231//intracellular membrane-bounded organelle	GO:0004866//endopeptidase inhibitor activity;GO:0004867//serine-type endopeptidase inhibitor activity;GO:0030414//peptidase inhibitor activity	GO:0007596//blood coagulation;GO:0007599//hemostasis;GO:0010466//negative regulation of peptidase activity;GO:0010951//negative regulation of endopeptidase activity;GO:0030195//negative regulation of blood coagulation;GO:0071383//cellular response to steroid hormone stimulus
ENST00000514343	ENSG00000003436	2.23x10⁻³	PTGER4-205	TFPI	GO:0005576//extracellular region;GO:0005615//extracellular space;GO:0005783//endoplasmic reticulum;GO:0005886//plasma membrane;GO:0005901//caveola;GO:0009986//cell surface;GO:0016020//membrane;GO:0031225//anchored component of membrane;GO:0043231//intracellular membrane-bounded organelle	GO:0004866//endopeptidase inhibitor activity;GO:0004867//serine-type endopeptidase inhibitor activity;GO:0030414//peptidase inhibitor activity	GO:0007596//blood coagulation;GO:0007599//hemostasis;GO:0010466//negative regulation of peptidase activity;GO:0010951//negative regulation of endopeptidase activity;GO:0030195//negative regulation of blood coagulation;GO:0071383//cellular response to steroid hormone stimulus
ENST00000514355	ENSG00000003436	1.64x10⁻³	RPL32P3-207	TFPI	GO:0005576//extracellular region;GO:0005615//extracellular space;GO:0005783//endoplasmic reticulum;GO:0005886//plasma membrane;GO:0005901//caveola;GO:0009986//cell surface;GO:0016020//membrane;GO:0031225//anchored component of membrane;GO:0043231//intracellular membrane-bounded organelle	GO:0004866//endopeptidase inhibitor activity;GO:0004867//serine-type endopeptidase inhibitor activity;GO:0030414//peptidase inhibitor activity	GO:0007596//blood coagulation;GO:0007599//hemostasis;GO:0010466//negative regulation of peptidase activity;GO:0010951//negative regulation of endopeptidase activity;GO:0030195//negative regulation of blood coagulation;GO:0071383//cellular response to steroid hormone stimulus
ENST00000515225	ENSG00000003436	8.58x10⁻⁴	DLC1-212	TFPI	GO:0005576//extracellular region;GO:0005615//extracellular space;GO:0005783//endoplasmic reticulum;GO:0005886//plasma membrane;GO:0005901//caveola;GO:0009986//cell surface;GO:0016020//membrane;GO:0031225//anchored component of membrane;GO:0043231//intracellular membrane-bounded organelle	GO:0004866//endopeptidase inhibitor activity;GO:0004867//serine-type endopeptidase inhibitor activity;GO:0030414//peptidase inhibitor activity	GO:0007596//blood coagulation;GO:0007599//hemostasis;GO:0010466//negative regulation of peptidase activity;GO:0010951//negative regulation of endopeptidase activity;GO:0030195//negative regulation of blood coagulation;GO:0071383//cellular response to steroid hormone stimulus
ENST00000519571	ENSG00000003436	1.25x10⁻³	GALNT10-207	TFPI	GO:0005576//extracellular region;GO:0005615//extracellular space;GO:0005783//endoplasmic reticulum;GO:0005886//plasma membrane;GO:0005901//caveola;GO:0009986//cell surface;GO:0016020//membrane;GO:0031225//anchored component of membrane;GO:0043231//intracellular membrane-bounded organelle	GO:0004866//endopeptidase inhibitor activity;GO:0004867//serine-type endopeptidase inhibitor activity;GO:0030414//peptidase inhibitor activity	GO:0007596//blood coagulation;GO:0007599//hemostasis;GO:0010466//negative regulation of peptidase activity;GO:0010951//negative regulation of endopeptidase activity;GO:0030195//negative regulation of blood coagulation;GO:0071383//cellular response to steroid hormone stimulus
ENST00000519691	ENSG00000003436	3.54x10⁻³	-	TFPI	GO:0005576//extracellular region;GO:0005615//extracellular space;GO:0005783//endoplasmic reticulum;GO:0005886//plasma membrane;GO:0005901//caveola;GO:0009986//cell surface;GO:0016020//membrane;GO:0031225//anchored component of membrane;GO:0043231//intracellular membrane-bounded organelle	GO:0004866//endopeptidase inhibitor activity;GO:0004867//serine-type endopeptidase inhibitor activity;GO:0030414//peptidase inhibitor activity	GO:0007596//blood coagulation;GO:0007599//hemostasis;GO:0010466//negative regulation of peptidase activity;GO:0010951//negative regulation of endopeptidase activity;GO:0030195//negative regulation of blood coagulation;GO:0071383//cellular response to steroid hormone stimulus
ENST00000527986	ENSG00000003436	1.84x10⁻³	WAC-AS1-201	TFPI	GO:0005576//extracellular region;GO:0005615//extracellular space;GO:0005783//endoplasmic reticulum;GO:0005886//plasma membrane;GO:0005901//caveola;GO:0009986//cell surface;GO:0016020//membrane;GO:0031225//anchored component of membrane;GO:0043231//intracellular membrane-bounded organelle	GO:0004866//endopeptidase inhibitor activity;GO:0004867//serine-type endopeptidase inhibitor activity;GO:0030414//peptidase inhibitor activity	GO:0007596//blood coagulation;GO:0007599//hemostasis;GO:0010466//negative regulation of peptidase activity;GO:0010951//negative regulation of endopeptidase activity;GO:0030195//negative regulation of blood coagulation;GO:0071383//cellular response to steroid hormone stimulus
ENST00000544307	ENSG00000003436	1.73x10⁻³	PDE3A-203	TFPI	GO:0005576//extracellular region;GO:0005615//extracellular space;GO:0005783//endoplasmic reticulum;GO:0005886//plasma membrane;GO:0005901//caveola;GO:0009986//cell surface;GO:0016020//membrane;GO:0031225//anchored component of membrane;GO:0043231//intracellular membrane-bounded organelle	GO:0004866//endopeptidase inhibitor activity;GO:0004867//serine-type endopeptidase inhibitor activity;GO:0030414//peptidase inhibitor activity	GO:0007596//blood coagulation;GO:0007599//hemostasis;GO:0010466//negative regulation of peptidase activity;GO:0010951//negative regulation of endopeptidase activity;GO:0030195//negative regulation of blood coagulation;GO:0071383//cellular response to steroid hormone stimulus
ENST00000551988	ENSG00000003436	1.59x10⁻³	PAH-213	TFPI	GO:0005576//extracellular region;GO:0005615//extracellular space;GO:0005783//endoplasmic reticulum;GO:0005886//plasma membrane;GO:0005901//caveola;GO:0009986//cell surface;GO:0016020//membrane;GO:0031225//anchored component of membrane;GO:0043231//intracellular membrane-bounded organelle	GO:0004866//endopeptidase inhibitor activity;GO:0004867//serine-type endopeptidase inhibitor activity;GO:0030414//peptidase inhibitor activity	GO:0007596//blood coagulation;GO:0007599//hemostasis;GO:0010466//negative regulation of peptidase activity;GO:0010951//negative regulation of endopeptidase activity;GO:0030195//negative regulation of blood coagulation;GO:0071383//cellular response to steroid hormone stimulus
ENST00000553596	ENSG00000003436	1.81x10⁻³	ARHGAP5-AS1-201	TFPI	GO:0005576//extracellular region;GO:0005615//extracellular space;GO:0005783//endoplasmic reticulum;GO:0005886//plasma membrane;GO:0005901//caveola;GO:0009986//cell surface;GO:0016020//membrane;GO:0031225//anchored component of membrane;GO:0043231//intracellular membrane-bounded organelle	GO:0004866//endopeptidase inhibitor activity;GO:0004867//serine-type endopeptidase inhibitor activity;GO:0030414//peptidase inhibitor activity	GO:0007596//blood coagulation;GO:0007599//hemostasis;GO:0010466//negative regulation of peptidase activity;GO:0010951//negative regulation of endopeptidase activity;GO:0030195//negative regulation of blood coagulation;GO:0071383//cellular response to steroid hormone stimulus
ENST00000554295	ENSG00000003436	2.11x10⁻³	SLC9A7P1-201	TFPI	GO:0005576//extracellular region;GO:0005615//extracellular space;GO:0005783//endoplasmic reticulum;GO:0005886//plasma membrane;GO:0005901//caveola;GO:0009986//cell surface;GO:0016020//membrane;GO:0031225//anchored component of membrane;GO:0043231//intracellular membrane-bounded organelle	GO:0004866//endopeptidase inhibitor activity;GO:0004867//serine-type endopeptidase inhibitor activity;GO:0030414//peptidase inhibitor activity	GO:0007596//blood coagulation;GO:0007599//hemostasis;GO:0010466//negative regulation of peptidase activity;GO:0010951//negative regulation of endopeptidase activity;GO:0030195//negative regulation of blood coagulation;GO:0071383//cellular response to steroid hormone stimulus
ENST00000556252	ENSG00000003436	2.40x10⁻³	OSGEP-211	TFPI	GO:0005576//extracellular region;GO:0005615//extracellular space;GO:0005783//endoplasmic reticulum;GO:0005886//plasma membrane;GO:0005901//caveola;GO:0009986//cell surface;GO:0016020//membrane;GO:0031225//anchored component of membrane;GO:0043231//intracellular membrane-bounded organelle	GO:0004866//endopeptidase inhibitor activity;GO:0004867//serine-type endopeptidase inhibitor activity;GO:0030414//peptidase inhibitor activity	GO:0007596//blood coagulation;GO:0007599//hemostasis;GO:0010466//negative regulation of peptidase activity;GO:0010951//negative regulation of endopeptidase activity;GO:0030195//negative regulation of blood coagulation;GO:0071383//cellular response to steroid hormone stimulus
ENST00000556335	ENSG00000003436	2.95x10⁻³	FLRT2-206	TFPI	GO:0005576//extracellular region;GO:0005615//extracellular space;GO:0005783//endoplasmic reticulum;GO:0005886//plasma membrane;GO:0005901//caveola;GO:0009986//cell surface;GO:0016020//membrane;GO:0031225//anchored component of membrane;GO:0043231//intracellular membrane-bounded organelle	GO:0004866//endopeptidase inhibitor activity;GO:0004867//serine-type endopeptidase inhibitor activity;GO:0030414//peptidase inhibitor activity	GO:0007596//blood coagulation;GO:0007599//hemostasis;GO:0010466//negative regulation of peptidase activity;GO:0010951//negative regulation of endopeptidase activity;GO:0030195//negative regulation of blood coagulation;GO:0071383//cellular response to steroid hormone stimulus
ENST00000567093	ENSG00000003436	1.14x10⁻³	-	TFPI	GO:0005576//extracellular region;GO:0005615//extracellular space;GO:0005783//endoplasmic reticulum;GO:0005886//plasma membrane;GO:0005901//caveola;GO:0009986//cell surface;GO:0016020//membrane;GO:0031225//anchored component of membrane;GO:0043231//intracellular membrane-bounded organelle	GO:0004866//endopeptidase inhibitor activity;GO:0004867//serine-type endopeptidase inhibitor activity;GO:0030414//peptidase inhibitor activity	GO:0007596//blood coagulation;GO:0007599//hemostasis;GO:0010466//negative regulation of peptidase activity;GO:0010951//negative regulation of endopeptidase activity;GO:0030195//negative regulation of blood coagulation;GO:0071383//cellular response to steroid hormone stimulus
ENST00000573312	ENSG00000003436	2.83x10⁻³	-	TFPI	GO:0005576//extracellular region;GO:0005615//extracellular space;GO:0005783//endoplasmic reticulum;GO:0005886//plasma membrane;GO:0005901//caveola;GO:0009986//cell surface;GO:0016020//membrane;GO:0031225//anchored component of membrane;GO:0043231//intracellular membrane-bounded organelle	GO:0004866//endopeptidase inhibitor activity;GO:0004867//serine-type endopeptidase inhibitor activity;GO:0030414//peptidase inhibitor activity	GO:0007596//blood coagulation;GO:0007599//hemostasis;GO:0010466//negative regulation of peptidase activity;GO:0010951//negative regulation of endopeptidase activity;GO:0030195//negative regulation of blood coagulation;GO:0071383//cellular response to steroid hormone stimulus
ENST00000577038	ENSG00000003436	2.16x10⁻³	MMD-203	TFPI	GO:0005576//extracellular region;GO:0005615//extracellular space;GO:0005783//endoplasmic reticulum;GO:0005886//plasma membrane;GO:0005901//caveola;GO:0009986//cell surface;GO:0016020//membrane;GO:0031225//anchored component of membrane;GO:0043231//intracellular membrane-bounded organelle	GO:0004866//endopeptidase inhibitor activity;GO:0004867//serine-type endopeptidase inhibitor activity;GO:0030414//peptidase inhibitor activity	GO:0007596//blood coagulation;GO:0007599//hemostasis;GO:0010466//negative regulation of peptidase activity;GO:0010951//negative regulation of endopeptidase activity;GO:0030195//negative regulation of blood coagulation;GO:0071383//cellular response to steroid hormone stimulus
ENST00000590797	ENSG00000003436	9.92x10⁻⁴	MIR122HG-201	TFPI	GO:0005576//extracellular region;GO:0005615//extracellular space;GO:0005783//endoplasmic reticulum;GO:0005886//plasma membrane;GO:0005901//caveola;GO:0009986//cell surface;GO:0016020//membrane;GO:0031225//anchored component of membrane;GO:0043231//intracellular membrane-bounded organelle	GO:0004866//endopeptidase inhibitor activity;GO:0004867//serine-type endopeptidase inhibitor activity;GO:0030414//peptidase inhibitor activity	GO:0007596//blood coagulation;GO:0007599//hemostasis;GO:0010466//negative regulation of peptidase activity;GO:0010951//negative regulation of endopeptidase activity;GO:0030195//negative regulation of blood coagulation;GO:0071383//cellular response to steroid hormone stimulus
ENST00000599640	ENSG00000003436	3.16x10⁻³	-	TFPI	GO:0005576//extracellular region;GO:0005615//extracellular space;GO:0005783//endoplasmic reticulum;GO:0005886//plasma membrane;GO:0005901//caveola;GO:0009986//cell surface;GO:0016020//membrane;GO:0031225//anchored component of membrane;GO:0043231//intracellular membrane-bounded organelle	GO:0004866//endopeptidase inhibitor activity;GO:0004867//serine-type endopeptidase inhibitor activity;GO:0030414//peptidase inhibitor activity	GO:0007596//blood coagulation;GO:0007599//hemostasis;GO:0010466//negative regulation of peptidase activity;GO:0010951//negative regulation of endopeptidase activity;GO:0030195//negative regulation of blood coagulation;GO:0071383//cellular response to steroid hormone stimulus
ENST00000606004	ENSG00000003436	3.54x10⁻³	LINC01145-203	TFPI	GO:0005576//extracellular region;GO:0005615//extracellular space;GO:0005783//endoplasmic reticulum;GO:0005886//plasma membrane;GO:0005901//caveola;GO:0009986//cell surface;GO:0016020//membrane;GO:0031225//anchored component of membrane;GO:0043231//intracellular membrane-bounded organelle	GO:0004866//endopeptidase inhibitor activity;GO:0004867//serine-type endopeptidase inhibitor activity;GO:0030414//peptidase inhibitor activity	GO:0007596//blood coagulation;GO:0007599//hemostasis;GO:0010466//negative regulation of peptidase activity;GO:0010951//negative regulation of endopeptidase activity;GO:0030195//negative regulation of blood coagulation;GO:0071383//cellular response to steroid hormone stimulus
ENST00000606242	ENSG00000003436	1.29x10⁻³	LINC01836-202	TFPI	GO:0005576//extracellular region;GO:0005615//extracellular space;GO:0005783//endoplasmic reticulum;GO:0005886//plasma membrane;GO:0005901//caveola;GO:0009986//cell surface;GO:0016020//membrane;GO:0031225//anchored component of membrane;GO:0043231//intracellular membrane-bounded organelle	GO:0004866//endopeptidase inhibitor activity;GO:0004867//serine-type endopeptidase inhibitor activity;GO:0030414//peptidase inhibitor activity	GO:0007596//blood coagulation;GO:0007599//hemostasis;GO:0010466//negative regulation of peptidase activity;GO:0010951//negative regulation of endopeptidase activity;GO:0030195//negative regulation of blood coagulation;GO:0071383//cellular response to steroid hormone stimulus
ENST00000613291	ENSG00000003436	2.47x10⁻³	-	TFPI	GO:0005576//extracellular region;GO:0005615//extracellular space;GO:0005783//endoplasmic reticulum;GO:0005886//plasma membrane;GO:0005901//caveola;GO:0009986//cell surface;GO:0016020//membrane;GO:0031225//anchored component of membrane;GO:0043231//intracellular membrane-bounded organelle	GO:0004866//endopeptidase inhibitor activity;GO:0004867//serine-type endopeptidase inhibitor activity;GO:0030414//peptidase inhibitor activity	GO:0007596//blood coagulation;GO:0007599//hemostasis;GO:0010466//negative regulation of peptidase activity;GO:0010951//negative regulation of endopeptidase activity;GO:0030195//negative regulation of blood coagulation;GO:0071383//cellular response to steroid hormone stimulus
ENST00000631190	ENSG00000003436	7.33x10⁻⁴	LINC00294-201	TFPI	GO:0005576//extracellular region;GO:0005615//extracellular space;GO:0005783//endoplasmic reticulum;GO:0005886//plasma membrane;GO:0005901//caveola;GO:0009986//cell surface;GO:0016020//membrane;GO:0031225//anchored component of membrane;GO:0043231//intracellular membrane-bounded organelle	GO:0004866//endopeptidase inhibitor activity;GO:0004867//serine-type endopeptidase inhibitor activity;GO:0030414//peptidase inhibitor activity	GO:0007596//blood coagulation;GO:0007599//hemostasis;GO:0010466//negative regulation of peptidase activity;GO:0010951//negative regulation of endopeptidase activity;GO:0030195//negative regulation of blood coagulation;GO:0071383//cellular response to steroid hormone stimulus
ENST00000643920	ENSG00000003436	1.28x10⁻³	TUG1-215	TFPI	GO:0005576//extracellular region;GO:0005615//extracellular space;GO:0005783//endoplasmic reticulum;GO:0005886//plasma membrane;GO:0005901//caveola;GO:0009986//cell surface;GO:0016020//membrane;GO:0031225//anchored component of membrane;GO:0043231//intracellular membrane-bounded organelle	GO:0004866//endopeptidase inhibitor activity;GO:0004867//serine-type endopeptidase inhibitor activity;GO:0030414//peptidase inhibitor activity	GO:0007596//blood coagulation;GO:0007599//hemostasis;GO:0010466//negative regulation of peptidase activity;GO:0010951//negative regulation of endopeptidase activity;GO:0030195//negative regulation of blood coagulation;GO:0071383//cellular response to steroid hormone stimulus
ENST00000659101	ENSG00000003436	3.66x10⁻³	LINC00623-206	TFPI	GO:0005576//extracellular region;GO:0005615//extracellular space;GO:0005783//endoplasmic reticulum;GO:0005886//plasma membrane;GO:0005901//caveola;GO:0009986//cell surface;GO:0016020//membrane;GO:0031225//anchored component of membrane;GO:0043231//intracellular membrane-bounded organelle	GO:0004866//endopeptidase inhibitor activity;GO:0004867//serine-type endopeptidase inhibitor activity;GO:0030414//peptidase inhibitor activity	GO:0007596//blood coagulation;GO:0007599//hemostasis;GO:0010466//negative regulation of peptidase activity;GO:0010951//negative regulation of endopeptidase activity;GO:0030195//negative regulation of blood coagulation;GO:0071383//cellular response to steroid hormone stimulus
ENST00000659452	ENSG00000003436	3.93x10⁻⁴	-	TFPI	GO:0005576//extracellular region;GO:0005615//extracellular space;GO:0005783//endoplasmic reticulum;GO:0005886//plasma membrane;GO:0005901//caveola;GO:0009986//cell surface;GO:0016020//membrane;GO:0031225//anchored component of membrane;GO:0043231//intracellular membrane-bounded organelle	GO:0004866//endopeptidase inhibitor activity;GO:0004867//serine-type endopeptidase inhibitor activity;GO:0030414//peptidase inhibitor activity	GO:0007596//blood coagulation;GO:0007599//hemostasis;GO:0010466//negative regulation of peptidase activity;GO:0010951//negative regulation of endopeptidase activity;GO:0030195//negative regulation of blood coagulation;GO:0071383//cellular response to steroid hormone stimulus
ENST00000659781	ENSG00000003436	1.25x10⁻³	LINC02432-207	TFPI	GO:0005576//extracellular region;GO:0005615//extracellular space;GO:0005783//endoplasmic reticulum;GO:0005886//plasma membrane;GO:0005901//caveola;GO:0009986//cell surface;GO:0016020//membrane;GO:0031225//anchored component of membrane;GO:0043231//intracellular membrane-bounded organelle	GO:0004866//endopeptidase inhibitor activity;GO:0004867//serine-type endopeptidase inhibitor activity;GO:0030414//peptidase inhibitor activity	GO:0007596//blood coagulation;GO:0007599//hemostasis;GO:0010466//negative regulation of peptidase activity;GO:0010951//negative regulation of endopeptidase activity;GO:0030195//negative regulation of blood coagulation;GO:0071383//cellular response to steroid hormone stimulus
ENST00000664273	ENSG00000003436	3.27x10⁻³	THUMPD3-AS1-227	TFPI	GO:0005576//extracellular region;GO:0005615//extracellular space;GO:0005783//endoplasmic reticulum;GO:0005886//plasma membrane;GO:0005901//caveola;GO:0009986//cell surface;GO:0016020//membrane;GO:0031225//anchored component of membrane;GO:0043231//intracellular membrane-bounded organelle	GO:0004866//endopeptidase inhibitor activity;GO:0004867//serine-type endopeptidase inhibitor activity;GO:0030414//peptidase inhibitor activity	GO:0007596//blood coagulation;GO:0007599//hemostasis;GO:0010466//negative regulation of peptidase activity;GO:0010951//negative regulation of endopeptidase activity;GO:0030195//negative regulation of blood coagulation;GO:0071383//cellular response to steroid hormone stimulus
ENST00000667119	ENSG00000003436	1.01x10⁻⁴	SNHG15-212	TFPI	GO:0005576//extracellular region;GO:0005615//extracellular space;GO:0005783//endoplasmic reticulum;GO:0005886//plasma membrane;GO:0005901//caveola;GO:0009986//cell surface;GO:0016020//membrane;GO:0031225//anchored component of membrane;GO:0043231//intracellular membrane-bounded organelle	GO:0004866//endopeptidase inhibitor activity;GO:0004867//serine-type endopeptidase inhibitor activity;GO:0030414//peptidase inhibitor activity	GO:0007596//blood coagulation;GO:0007599//hemostasis;GO:0010466//negative regulation of peptidase activity;GO:0010951//negative regulation of endopeptidase activity;GO:0030195//negative regulation of blood coagulation;GO:0071383//cellular response to steroid hormone stimulus
ENST00000676598	ENSG00000003436	1.94x10⁻³	PCSK6-222	TFPI	GO:0005576//extracellular region;GO:0005615//extracellular space;GO:0005783//endoplasmic reticulum;GO:0005886//plasma membrane;GO:0005901//caveola;GO:0009986//cell surface;GO:0016020//membrane;GO:0031225//anchored component of membrane;GO:0043231//intracellular membrane-bounded organelle	GO:0004866//endopeptidase inhibitor activity;GO:0004867//serine-type endopeptidase inhibitor activity;GO:0030414//peptidase inhibitor activity	GO:0007596//blood coagulation;GO:0007599//hemostasis;GO:0010466//negative regulation of peptidase activity;GO:0010951//negative regulation of endopeptidase activity;GO:0030195//negative regulation of blood coagulation;GO:0071383//cellular response to steroid hormone stimulus
ENST00000678054	ENSG00000003436	2.66x10⁻⁴	KPNA2-218	TFPI	GO:0005576//extracellular region;GO:0005615//extracellular space;GO:0005783//endoplasmic reticulum;GO:0005886//plasma membrane;GO:0005901//caveola;GO:0009986//cell surface;GO:0016020//membrane;GO:0031225//anchored component of membrane;GO:0043231//intracellular membrane-bounded organelle	GO:0004866//endopeptidase inhibitor activity;GO:0004867//serine-type endopeptidase inhibitor activity;GO:0030414//peptidase inhibitor activity	GO:0007596//blood coagulation;GO:0007599//hemostasis;GO:0010466//negative regulation of peptidase activity;GO:0010951//negative regulation of endopeptidase activity;GO:0030195//negative regulation of blood coagulation;GO:0071383//cellular response to steroid hormone stimulus
ENST00000684189	ENSG00000003436	3.61x10⁻⁶	EXT1-204	TFPI	GO:0005576//extracellular region;GO:0005615//extracellular space;GO:0005783//endoplasmic reticulum;GO:0005886//plasma membrane;GO:0005901//caveola;GO:0009986//cell surface;GO:0016020//membrane;GO:0031225//anchored component of membrane;GO:0043231//intracellular membrane-bounded organelle	GO:0004866//endopeptidase inhibitor activity;GO:0004867//serine-type endopeptidase inhibitor activity;GO:0030414//peptidase inhibitor activity	GO:0007596//blood coagulation;GO:0007599//hemostasis;GO:0010466//negative regulation of peptidase activity;GO:0010951//negative regulation of endopeptidase activity;GO:0030195//negative regulation of blood coagulation;GO:0071383//cellular response to steroid hormone stimulus
ENST00000687035	ENSG00000003436	8.82x10⁻⁴	-	TFPI	GO:0005576//extracellular region;GO:0005615//extracellular space;GO:0005783//endoplasmic reticulum;GO:0005886//plasma membrane;GO:0005901//caveola;GO:0009986//cell surface;GO:0016020//membrane;GO:0031225//anchored component of membrane;GO:0043231//intracellular membrane-bounded organelle	GO:0004866//endopeptidase inhibitor activity;GO:0004867//serine-type endopeptidase inhibitor activity;GO:0030414//peptidase inhibitor activity	GO:0007596//blood coagulation;GO:0007599//hemostasis;GO:0010466//negative regulation of peptidase activity;GO:0010951//negative regulation of endopeptidase activity;GO:0030195//negative regulation of blood coagulation;GO:0071383//cellular response to steroid hormone stimulus
ENST00000687575	ENSG00000003436	8.82x10⁻⁴	-	TFPI	GO:0005576//extracellular region;GO:0005615//extracellular space;GO:0005783//endoplasmic reticulum;GO:0005886//plasma membrane;GO:0005901//caveola;GO:0009986//cell surface;GO:0016020//membrane;GO:0031225//anchored component of membrane;GO:0043231//intracellular membrane-bounded organelle	GO:0004866//endopeptidase inhibitor activity;GO:0004867//serine-type endopeptidase inhibitor activity;GO:0030414//peptidase inhibitor activity	GO:0007596//blood coagulation;GO:0007599//hemostasis;GO:0010466//negative regulation of peptidase activity;GO:0010951//negative regulation of endopeptidase activity;GO:0030195//negative regulation of blood coagulation;GO:0071383//cellular response to steroid hormone stimulus
MSTRG.10478.1	ENSG00000003436	3.01x10⁻⁴	-	TFPI	GO:0005576//extracellular region;GO:0005615//extracellular space;GO:0005783//endoplasmic reticulum;GO:0005886//plasma membrane;GO:0005901//caveola;GO:0009986//cell surface;GO:0016020//membrane;GO:0031225//anchored component of membrane;GO:0043231//intracellular membrane-bounded organelle	GO:0004866//endopeptidase inhibitor activity;GO:0004867//serine-type endopeptidase inhibitor activity;GO:0030414//peptidase inhibitor activity	GO:0007596//blood coagulation;GO:0007599//hemostasis;GO:0010466//negative regulation of peptidase activity;GO:0010951//negative regulation of endopeptidase activity;GO:0030195//negative regulation of blood coagulation;GO:0071383//cellular response to steroid hormone stimulus
MSTRG.12503.1	ENSG00000003436	8.83x10⁻⁴	-	TFPI	GO:0005576//extracellular region;GO:0005615//extracellular space;GO:0005783//endoplasmic reticulum;GO:0005886//plasma membrane;GO:0005901//caveola;GO:0009986//cell surface;GO:0016020//membrane;GO:0031225//anchored component of membrane;GO:0043231//intracellular membrane-bounded organelle	GO:0004866//endopeptidase inhibitor activity;GO:0004867//serine-type endopeptidase inhibitor activity;GO:0030414//peptidase inhibitor activity	GO:0007596//blood coagulation;GO:0007599//hemostasis;GO:0010466//negative regulation of peptidase activity;GO:0010951//negative regulation of endopeptidase activity;GO:0030195//negative regulation of blood coagulation;GO:0071383//cellular response to steroid hormone stimulus
MSTRG.14210.2	ENSG00000003436	3.15x10⁻³	-	TFPI	GO:0005576//extracellular region;GO:0005615//extracellular space;GO:0005783//endoplasmic reticulum;GO:0005886//plasma membrane;GO:0005901//caveola;GO:0009986//cell surface;GO:0016020//membrane;GO:0031225//anchored component of membrane;GO:0043231//intracellular membrane-bounded organelle	GO:0004866//endopeptidase inhibitor activity;GO:0004867//serine-type endopeptidase inhibitor activity;GO:0030414//peptidase inhibitor activity	GO:0007596//blood coagulation;GO:0007599//hemostasis;GO:0010466//negative regulation of peptidase activity;GO:0010951//negative regulation of endopeptidase activity;GO:0030195//negative regulation of blood coagulation;GO:0071383//cellular response to steroid hormone stimulus
MSTRG.14271.16	ENSG00000003436	3.35x10⁻³	-	TFPI	GO:0005576//extracellular region;GO:0005615//extracellular space;GO:0005783//endoplasmic reticulum;GO:0005886//plasma membrane;GO:0005901//caveola;GO:0009986//cell surface;GO:0016020//membrane;GO:0031225//anchored component of membrane;GO:0043231//intracellular membrane-bounded organelle	GO:0004866//endopeptidase inhibitor activity;GO:0004867//serine-type endopeptidase inhibitor activity;GO:0030414//peptidase inhibitor activity	GO:0007596//blood coagulation;GO:0007599//hemostasis;GO:0010466//negative regulation of peptidase activity;GO:0010951//negative regulation of endopeptidase activity;GO:0030195//negative regulation of blood coagulation;GO:0071383//cellular response to steroid hormone stimulus
MSTRG.14740.4	ENSG00000003436	1.80x10⁻³	-	TFPI	GO:0005576//extracellular region;GO:0005615//extracellular space;GO:0005783//endoplasmic reticulum;GO:0005886//plasma membrane;GO:0005901//caveola;GO:0009986//cell surface;GO:0016020//membrane;GO:0031225//anchored component of membrane;GO:0043231//intracellular membrane-bounded organelle	GO:0004866//endopeptidase inhibitor activity;GO:0004867//serine-type endopeptidase inhibitor activity;GO:0030414//peptidase inhibitor activity	GO:0007596//blood coagulation;GO:0007599//hemostasis;GO:0010466//negative regulation of peptidase activity;GO:0010951//negative regulation of endopeptidase activity;GO:0030195//negative regulation of blood coagulation;GO:0071383//cellular response to steroid hormone stimulus
MSTRG.16535.1	ENSG00000003436	1.32x10⁻³	-	TFPI	GO:0005576//extracellular region;GO:0005615//extracellular space;GO:0005783//endoplasmic reticulum;GO:0005886//plasma membrane;GO:0005901//caveola;GO:0009986//cell surface;GO:0016020//membrane;GO:0031225//anchored component of membrane;GO:0043231//intracellular membrane-bounded organelle	GO:0004866//endopeptidase inhibitor activity;GO:0004867//serine-type endopeptidase inhibitor activity;GO:0030414//peptidase inhibitor activity	GO:0007596//blood coagulation;GO:0007599//hemostasis;GO:0010466//negative regulation of peptidase activity;GO:0010951//negative regulation of endopeptidase activity;GO:0030195//negative regulation of blood coagulation;GO:0071383//cellular response to steroid hormone stimulus
MSTRG.19223.2	ENSG00000003436	1.89x10⁻³	-	TFPI	GO:0005576//extracellular region;GO:0005615//extracellular space;GO:0005783//endoplasmic reticulum;GO:0005886//plasma membrane;GO:0005901//caveola;GO:0009986//cell surface;GO:0016020//membrane;GO:0031225//anchored component of membrane;GO:0043231//intracellular membrane-bounded organelle	GO:0004866//endopeptidase inhibitor activity;GO:0004867//serine-type endopeptidase inhibitor activity;GO:0030414//peptidase inhibitor activity	GO:0007596//blood coagulation;GO:0007599//hemostasis;GO:0010466//negative regulation of peptidase activity;GO:0010951//negative regulation of endopeptidase activity;GO:0030195//negative regulation of blood coagulation;GO:0071383//cellular response to steroid hormone stimulus
MSTRG.19223.5	ENSG00000003436	1.47x10⁻³	-	TFPI	GO:0005576//extracellular region;GO:0005615//extracellular space;GO:0005783//endoplasmic reticulum;GO:0005886//plasma membrane;GO:0005901//caveola;GO:0009986//cell surface;GO:0016020//membrane;GO:0031225//anchored component of membrane;GO:0043231//intracellular membrane-bounded organelle	GO:0004866//endopeptidase inhibitor activity;GO:0004867//serine-type endopeptidase inhibitor activity;GO:0030414//peptidase inhibitor activity	GO:0007596//blood coagulation;GO:0007599//hemostasis;GO:0010466//negative regulation of peptidase activity;GO:0010951//negative regulation of endopeptidase activity;GO:0030195//negative regulation of blood coagulation;GO:0071383//cellular response to steroid hormone stimulus
MSTRG.19229.3	ENSG00000003436	1.24x10⁻³	-	TFPI	GO:0005576//extracellular region;GO:0005615//extracellular space;GO:0005783//endoplasmic reticulum;GO:0005886//plasma membrane;GO:0005901//caveola;GO:0009986//cell surface;GO:0016020//membrane;GO:0031225//anchored component of membrane;GO:0043231//intracellular membrane-bounded organelle	GO:0004866//endopeptidase inhibitor activity;GO:0004867//serine-type endopeptidase inhibitor activity;GO:0030414//peptidase inhibitor activity	GO:0007596//blood coagulation;GO:0007599//hemostasis;GO:0010466//negative regulation of peptidase activity;GO:0010951//negative regulation of endopeptidase activity;GO:0030195//negative regulation of blood coagulation;GO:0071383//cellular response to steroid hormone stimulus
MSTRG.19288.2	ENSG00000003436	9.46x10⁻⁴	-	TFPI	GO:0005576//extracellular region;GO:0005615//extracellular space;GO:0005783//endoplasmic reticulum;GO:0005886//plasma membrane;GO:0005901//caveola;GO:0009986//cell surface;GO:0016020//membrane;GO:0031225//anchored component of membrane;GO:0043231//intracellular membrane-bounded organelle	GO:0004866//endopeptidase inhibitor activity;GO:0004867//serine-type endopeptidase inhibitor activity;GO:0030414//peptidase inhibitor activity	GO:0007596//blood coagulation;GO:0007599//hemostasis;GO:0010466//negative regulation of peptidase activity;GO:0010951//negative regulation of endopeptidase activity;GO:0030195//negative regulation of blood coagulation;GO:0071383//cellular response to steroid hormone stimulus
MSTRG.19368.1	ENSG00000003436	1.03x10⁻³	-	TFPI	GO:0005576//extracellular region;GO:0005615//extracellular space;GO:0005783//endoplasmic reticulum;GO:0005886//plasma membrane;GO:0005901//caveola;GO:0009986//cell surface;GO:0016020//membrane;GO:0031225//anchored component of membrane;GO:0043231//intracellular membrane-bounded organelle	GO:0004866//endopeptidase inhibitor activity;GO:0004867//serine-type endopeptidase inhibitor activity;GO:0030414//peptidase inhibitor activity	GO:0007596//blood coagulation;GO:0007599//hemostasis;GO:0010466//negative regulation of peptidase activity;GO:0010951//negative regulation of endopeptidase activity;GO:0030195//negative regulation of blood coagulation;GO:0071383//cellular response to steroid hormone stimulus
MSTRG.19832.3	ENSG00000003436	1.49x10⁻³	-	TFPI	GO:0005576//extracellular region;GO:0005615//extracellular space;GO:0005783//endoplasmic reticulum;GO:0005886//plasma membrane;GO:0005901//caveola;GO:0009986//cell surface;GO:0016020//membrane;GO:0031225//anchored component of membrane;GO:0043231//intracellular membrane-bounded organelle	GO:0004866//endopeptidase inhibitor activity;GO:0004867//serine-type endopeptidase inhibitor activity;GO:0030414//peptidase inhibitor activity	GO:0007596//blood coagulation;GO:0007599//hemostasis;GO:0010466//negative regulation of peptidase activity;GO:0010951//negative regulation of endopeptidase activity;GO:0030195//negative regulation of blood coagulation;GO:0071383//cellular response to steroid hormone stimulus
MSTRG.20229.5	ENSG00000003436	1.65x10⁻³	-	TFPI	GO:0005576//extracellular region;GO:0005615//extracellular space;GO:0005783//endoplasmic reticulum;GO:0005886//plasma membrane;GO:0005901//caveola;GO:0009986//cell surface;GO:0016020//membrane;GO:0031225//anchored component of membrane;GO:0043231//intracellular membrane-bounded organelle	GO:0004866//endopeptidase inhibitor activity;GO:0004867//serine-type endopeptidase inhibitor activity;GO:0030414//peptidase inhibitor activity	GO:0007596//blood coagulation;GO:0007599//hemostasis;GO:0010466//negative regulation of peptidase activity;GO:0010951//negative regulation of endopeptidase activity;GO:0030195//negative regulation of blood coagulation;GO:0071383//cellular response to steroid hormone stimulus
MSTRG.20287.2	ENSG00000003436	2.49x10⁻³	-	TFPI	GO:0005576//extracellular region;GO:0005615//extracellular space;GO:0005783//endoplasmic reticulum;GO:0005886//plasma membrane;GO:0005901//caveola;GO:0009986//cell surface;GO:0016020//membrane;GO:0031225//anchored component of membrane;GO:0043231//intracellular membrane-bounded organelle	GO:0004866//endopeptidase inhibitor activity;GO:0004867//serine-type endopeptidase inhibitor activity;GO:0030414//peptidase inhibitor activity	GO:0007596//blood coagulation;GO:0007599//hemostasis;GO:0010466//negative regulation of peptidase activity;GO:0010951//negative regulation of endopeptidase activity;GO:0030195//negative regulation of blood coagulation;GO:0071383//cellular response to steroid hormone stimulus
MSTRG.2122.1	ENSG00000003436	3.52x10⁻³	-	TFPI	GO:0005576//extracellular region;GO:0005615//extracellular space;GO:0005783//endoplasmic reticulum;GO:0005886//plasma membrane;GO:0005901//caveola;GO:0009986//cell surface;GO:0016020//membrane;GO:0031225//anchored component of membrane;GO:0043231//intracellular membrane-bounded organelle	GO:0004866//endopeptidase inhibitor activity;GO:0004867//serine-type endopeptidase inhibitor activity;GO:0030414//peptidase inhibitor activity	GO:0007596//blood coagulation;GO:0007599//hemostasis;GO:0010466//negative regulation of peptidase activity;GO:0010951//negative regulation of endopeptidase activity;GO:0030195//negative regulation of blood coagulation;GO:0071383//cellular response to steroid hormone stimulus
MSTRG.25695.1	ENSG00000003436	2.57x10⁻³	-	TFPI	GO:0005576//extracellular region;GO:0005615//extracellular space;GO:0005783//endoplasmic reticulum;GO:0005886//plasma membrane;GO:0005901//caveola;GO:0009986//cell surface;GO:0016020//membrane;GO:0031225//anchored component of membrane;GO:0043231//intracellular membrane-bounded organelle	GO:0004866//endopeptidase inhibitor activity;GO:0004867//serine-type endopeptidase inhibitor activity;GO:0030414//peptidase inhibitor activity	GO:0007596//blood coagulation;GO:0007599//hemostasis;GO:0010466//negative regulation of peptidase activity;GO:0010951//negative regulation of endopeptidase activity;GO:0030195//negative regulation of blood coagulation;GO:0071383//cellular response to steroid hormone stimulus
MSTRG.4038.1	ENSG00000003436	3.38x10⁻⁴	-	TFPI	GO:0005576//extracellular region;GO:0005615//extracellular space;GO:0005783//endoplasmic reticulum;GO:0005886//plasma membrane;GO:0005901//caveola;GO:0009986//cell surface;GO:0016020//membrane;GO:0031225//anchored component of membrane;GO:0043231//intracellular membrane-bounded organelle	GO:0004866//endopeptidase inhibitor activity;GO:0004867//serine-type endopeptidase inhibitor activity;GO:0030414//peptidase inhibitor activity	GO:0007596//blood coagulation;GO:0007599//hemostasis;GO:0010466//negative regulation of peptidase activity;GO:0010951//negative regulation of endopeptidase activity;GO:0030195//negative regulation of blood coagulation;GO:0071383//cellular response to steroid hormone stimulus
MSTRG.484.6	ENSG00000003436	1.48x10⁻⁵	-	TFPI	GO:0005576//extracellular region;GO:0005615//extracellular space;GO:0005783//endoplasmic reticulum;GO:0005886//plasma membrane;GO:0005901//caveola;GO:0009986//cell surface;GO:0016020//membrane;GO:0031225//anchored component of membrane;GO:0043231//intracellular membrane-bounded organelle	GO:0004866//endopeptidase inhibitor activity;GO:0004867//serine-type endopeptidase inhibitor activity;GO:0030414//peptidase inhibitor activity	GO:0007596//blood coagulation;GO:0007599//hemostasis;GO:0010466//negative regulation of peptidase activity;GO:0010951//negative regulation of endopeptidase activity;GO:0030195//negative regulation of blood coagulation;GO:0071383//cellular response to steroid hormone stimulus
MSTRG.6200.2	ENSG00000003436	3.68x10⁻³	-	TFPI	GO:0005576//extracellular region;GO:0005615//extracellular space;GO:0005783//endoplasmic reticulum;GO:0005886//plasma membrane;GO:0005901//caveola;GO:0009986//cell surface;GO:0016020//membrane;GO:0031225//anchored component of membrane;GO:0043231//intracellular membrane-bounded organelle	GO:0004866//endopeptidase inhibitor activity;GO:0004867//serine-type endopeptidase inhibitor activity;GO:0030414//peptidase inhibitor activity	GO:0007596//blood coagulation;GO:0007599//hemostasis;GO:0010466//negative regulation of peptidase activity;GO:0010951//negative regulation of endopeptidase activity;GO:0030195//negative regulation of blood coagulation;GO:0071383//cellular response to steroid hormone stimulus
MSTRG.7196.4	ENSG00000003436	4.37x10⁻⁴	-	TFPI	GO:0005576//extracellular region;GO:0005615//extracellular space;GO:0005783//endoplasmic reticulum;GO:0005886//plasma membrane;GO:0005901//caveola;GO:0009986//cell surface;GO:0016020//membrane;GO:0031225//anchored component of membrane;GO:0043231//intracellular membrane-bounded organelle	GO:0004866//endopeptidase inhibitor activity;GO:0004867//serine-type endopeptidase inhibitor activity;GO:0030414//peptidase inhibitor activity	GO:0007596//blood coagulation;GO:0007599//hemostasis;GO:0010466//negative regulation of peptidase activity;GO:0010951//negative regulation of endopeptidase activity;GO:0030195//negative regulation of blood coagulation;GO:0071383//cellular response to steroid hormone stimulus
MSTRG.7204.1	ENSG00000003436	6.99x10⁻⁴	-	TFPI	GO:0005576//extracellular region;GO:0005615//extracellular space;GO:0005783//endoplasmic reticulum;GO:0005886//plasma membrane;GO:0005901//caveola;GO:0009986//cell surface;GO:0016020//membrane;GO:0031225//anchored component of membrane;GO:0043231//intracellular membrane-bounded organelle	GO:0004866//endopeptidase inhibitor activity;GO:0004867//serine-type endopeptidase inhibitor activity;GO:0030414//peptidase inhibitor activity	GO:0007596//blood coagulation;GO:0007599//hemostasis;GO:0010466//negative regulation of peptidase activity;GO:0010951//negative regulation of endopeptidase activity;GO:0030195//negative regulation of blood coagulation;GO:0071383//cellular response to steroid hormone stimulus
MSTRG.7205.1	ENSG00000003436	9.16x10⁻⁴	-	TFPI	GO:0005576//extracellular region;GO:0005615//extracellular space;GO:0005783//endoplasmic reticulum;GO:0005886//plasma membrane;GO:0005901//caveola;GO:0009986//cell surface;GO:0016020//membrane;GO:0031225//anchored component of membrane;GO:0043231//intracellular membrane-bounded organelle	GO:0004866//endopeptidase inhibitor activity;GO:0004867//serine-type endopeptidase inhibitor activity;GO:0030414//peptidase inhibitor activity	GO:0007596//blood coagulation;GO:0007599//hemostasis;GO:0010466//negative regulation of peptidase activity;GO:0010951//negative regulation of endopeptidase activity;GO:0030195//negative regulation of blood coagulation;GO:0071383//cellular response to steroid hormone stimulus
MSTRG.7207.1	ENSG00000003436	8.40x10⁻⁴	-	TFPI	GO:0005576//extracellular region;GO:0005615//extracellular space;GO:0005783//endoplasmic reticulum;GO:0005886//plasma membrane;GO:0005901//caveola;GO:0009986//cell surface;GO:0016020//membrane;GO:0031225//anchored component of membrane;GO:0043231//intracellular membrane-bounded organelle	GO:0004866//endopeptidase inhibitor activity;GO:0004867//serine-type endopeptidase inhibitor activity;GO:0030414//peptidase inhibitor activity	GO:0007596//blood coagulation;GO:0007599//hemostasis;GO:0010466//negative regulation of peptidase activity;GO:0010951//negative regulation of endopeptidase activity;GO:0030195//negative regulation of blood coagulation;GO:0071383//cellular response to steroid hormone stimulus
MSTRG.7242.1	ENSG00000003436	1.59x10⁻³	-	TFPI	GO:0005576//extracellular region;GO:0005615//extracellular space;GO:0005783//endoplasmic reticulum;GO:0005886//plasma membrane;GO:0005901//caveola;GO:0009986//cell surface;GO:0016020//membrane;GO:0031225//anchored component of membrane;GO:0043231//intracellular membrane-bounded organelle	GO:0004866//endopeptidase inhibitor activity;GO:0004867//serine-type endopeptidase inhibitor activity;GO:0030414//peptidase inhibitor activity	GO:0007596//blood coagulation;GO:0007599//hemostasis;GO:0010466//negative regulation of peptidase activity;GO:0010951//negative regulation of endopeptidase activity;GO:0030195//negative regulation of blood coagulation;GO:0071383//cellular response to steroid hormone stimulus
ENST00000391874	ENSG00000003989	1.32x10⁻³	ENAH-205	SLC7A2	GO:0005886//plasma membrane;GO:0005887//integral component of plasma membrane;GO:0016020//membrane;GO:0016021//integral component of membrane;GO:0030054//cell junction	GO:0000064//L-ornithine transmembrane transporter activity;GO:0008324//cation transmembrane transporter activity;GO:0008514//organic anion transmembrane transporter activity;GO:0015171//amino acid transmembrane transporter activity;GO:0015174//basic amino acid transmembrane transporter activity;GO:0015179//L-amino acid transmembrane transporter activity;GO:0015189//L-lysine transmembrane transpor…	GO:0006865//amino acid transport;GO:0015807//L-amino acid transport;GO:0055085//transmembrane transport;GO:0089718//amino acid import across plasma membrane;GO:0097638//L-arginine import across plasma membrane;GO:0150104//transport across blood-brain barrier;GO:1902475//L-alpha-amino acid transmembrane transport;GO:1903352//L-ornithine transmembrane transport;GO:1903401//L-lysine transmembrane tr…
ENST00000423891	ENSG00000003989	1.99x10⁻³	JAG1-202	SLC7A2	GO:0005886//plasma membrane;GO:0005887//integral component of plasma membrane;GO:0016020//membrane;GO:0016021//integral component of membrane;GO:0030054//cell junction	GO:0000064//L-ornithine transmembrane transporter activity;GO:0008324//cation transmembrane transporter activity;GO:0008514//organic anion transmembrane transporter activity;GO:0015171//amino acid transmembrane transporter activity;GO:0015174//basic amino acid transmembrane transporter activity;GO:0015179//L-amino acid transmembrane transporter activity;GO:0015189//L-lysine transmembrane transpor…	GO:0006865//amino acid transport;GO:0015807//L-amino acid transport;GO:0055085//transmembrane transport;GO:0089718//amino acid import across plasma membrane;GO:0097638//L-arginine import across plasma membrane;GO:0150104//transport across blood-brain barrier;GO:1902475//L-alpha-amino acid transmembrane transport;GO:1903352//L-ornithine transmembrane transport;GO:1903401//L-lysine transmembrane tr…
ENST00000477661	ENSG00000003989	1.11x10⁻³	AKR1C1-205	SLC7A2	GO:0005886//plasma membrane;GO:0005887//integral component of plasma membrane;GO:0016020//membrane;GO:0016021//integral component of membrane;GO:0030054//cell junction	GO:0000064//L-ornithine transmembrane transporter activity;GO:0008324//cation transmembrane transporter activity;GO:0008514//organic anion transmembrane transporter activity;GO:0015171//amino acid transmembrane transporter activity;GO:0015174//basic amino acid transmembrane transporter activity;GO:0015179//L-amino acid transmembrane transporter activity;GO:0015189//L-lysine transmembrane transpor…	GO:0006865//amino acid transport;GO:0015807//L-amino acid transport;GO:0055085//transmembrane transport;GO:0089718//amino acid import across plasma membrane;GO:0097638//L-arginine import across plasma membrane;GO:0150104//transport across blood-brain barrier;GO:1902475//L-alpha-amino acid transmembrane transport;GO:1903352//L-ornithine transmembrane transport;GO:1903401//L-lysine transmembrane tr…
ENST00000480212	ENSG00000003989	2.87x10⁻⁴	CD302-203	SLC7A2	GO:0005886//plasma membrane;GO:0005887//integral component of plasma membrane;GO:0016020//membrane;GO:0016021//integral component of membrane;GO:0030054//cell junction	GO:0000064//L-ornithine transmembrane transporter activity;GO:0008324//cation transmembrane transporter activity;GO:0008514//organic anion transmembrane transporter activity;GO:0015171//amino acid transmembrane transporter activity;GO:0015174//basic amino acid transmembrane transporter activity;GO:0015179//L-amino acid transmembrane transporter activity;GO:0015189//L-lysine transmembrane transpor…	GO:0006865//amino acid transport;GO:0015807//L-amino acid transport;GO:0055085//transmembrane transport;GO:0089718//amino acid import across plasma membrane;GO:0097638//L-arginine import across plasma membrane;GO:0150104//transport across blood-brain barrier;GO:1902475//L-alpha-amino acid transmembrane transport;GO:1903352//L-ornithine transmembrane transport;GO:1903401//L-lysine transmembrane tr…
ENST00000481527	ENSG00000003989	2.25x10⁻³	ACOX2-211	SLC7A2	GO:0005886//plasma membrane;GO:0005887//integral component of plasma membrane;GO:0016020//membrane;GO:0016021//integral component of membrane;GO:0030054//cell junction	GO:0000064//L-ornithine transmembrane transporter activity;GO:0008324//cation transmembrane transporter activity;GO:0008514//organic anion transmembrane transporter activity;GO:0015171//amino acid transmembrane transporter activity;GO:0015174//basic amino acid transmembrane transporter activity;GO:0015179//L-amino acid transmembrane transporter activity;GO:0015189//L-lysine transmembrane transpor…	GO:0006865//amino acid transport;GO:0015807//L-amino acid transport;GO:0055085//transmembrane transport;GO:0089718//amino acid import across plasma membrane;GO:0097638//L-arginine import across plasma membrane;GO:0150104//transport across blood-brain barrier;GO:1902475//L-alpha-amino acid transmembrane transport;GO:1903352//L-ornithine transmembrane transport;GO:1903401//L-lysine transmembrane tr…
ENST00000491958	ENSG00000003989	3.26x10⁻³	SELENOM-208	SLC7A2	GO:0005886//plasma membrane;GO:0005887//integral component of plasma membrane;GO:0016020//membrane;GO:0016021//integral component of membrane;GO:0030054//cell junction	GO:0000064//L-ornithine transmembrane transporter activity;GO:0008324//cation transmembrane transporter activity;GO:0008514//organic anion transmembrane transporter activity;GO:0015171//amino acid transmembrane transporter activity;GO:0015174//basic amino acid transmembrane transporter activity;GO:0015179//L-amino acid transmembrane transporter activity;GO:0015189//L-lysine transmembrane transpor…	GO:0006865//amino acid transport;GO:0015807//L-amino acid transport;GO:0055085//transmembrane transport;GO:0089718//amino acid import across plasma membrane;GO:0097638//L-arginine import across plasma membrane;GO:0150104//transport across blood-brain barrier;GO:1902475//L-alpha-amino acid transmembrane transport;GO:1903352//L-ornithine transmembrane transport;GO:1903401//L-lysine transmembrane tr…
ENST00000508785	ENSG00000003989	1.58x10⁻³	MACROH2A1-213	SLC7A2	GO:0005886//plasma membrane;GO:0005887//integral component of plasma membrane;GO:0016020//membrane;GO:0016021//integral component of membrane;GO:0030054//cell junction	GO:0000064//L-ornithine transmembrane transporter activity;GO:0008324//cation transmembrane transporter activity;GO:0008514//organic anion transmembrane transporter activity;GO:0015171//amino acid transmembrane transporter activity;GO:0015174//basic amino acid transmembrane transporter activity;GO:0015179//L-amino acid transmembrane transporter activity;GO:0015189//L-lysine transmembrane transpor…	GO:0006865//amino acid transport;GO:0015807//L-amino acid transport;GO:0055085//transmembrane transport;GO:0089718//amino acid import across plasma membrane;GO:0097638//L-arginine import across plasma membrane;GO:0150104//transport across blood-brain barrier;GO:1902475//L-alpha-amino acid transmembrane transport;GO:1903352//L-ornithine transmembrane transport;GO:1903401//L-lysine transmembrane tr…
ENST00000515225	ENSG00000003989	1.46x10⁻³	DLC1-212	SLC7A2	GO:0005886//plasma membrane;GO:0005887//integral component of plasma membrane;GO:0016020//membrane;GO:0016021//integral component of membrane;GO:0030054//cell junction	GO:0000064//L-ornithine transmembrane transporter activity;GO:0008324//cation transmembrane transporter activity;GO:0008514//organic anion transmembrane transporter activity;GO:0015171//amino acid transmembrane transporter activity;GO:0015174//basic amino acid transmembrane transporter activity;GO:0015179//L-amino acid transmembrane transporter activity;GO:0015189//L-lysine transmembrane transpor…	GO:0006865//amino acid transport;GO:0015807//L-amino acid transport;GO:0055085//transmembrane transport;GO:0089718//amino acid import across plasma membrane;GO:0097638//L-arginine import across plasma membrane;GO:0150104//transport across blood-brain barrier;GO:1902475//L-alpha-amino acid transmembrane transport;GO:1903352//L-ornithine transmembrane transport;GO:1903401//L-lysine transmembrane tr…
ENST00000519691	ENSG00000003989	9.24x10⁻⁴	-	SLC7A2	GO:0005886//plasma membrane;GO:0005887//integral component of plasma membrane;GO:0016020//membrane;GO:0016021//integral component of membrane;GO:0030054//cell junction	GO:0000064//L-ornithine transmembrane transporter activity;GO:0008324//cation transmembrane transporter activity;GO:0008514//organic anion transmembrane transporter activity;GO:0015171//amino acid transmembrane transporter activity;GO:0015174//basic amino acid transmembrane transporter activity;GO:0015179//L-amino acid transmembrane transporter activity;GO:0015189//L-lysine transmembrane transpor…	GO:0006865//amino acid transport;GO:0015807//L-amino acid transport;GO:0055085//transmembrane transport;GO:0089718//amino acid import across plasma membrane;GO:0097638//L-arginine import across plasma membrane;GO:0150104//transport across blood-brain barrier;GO:1902475//L-alpha-amino acid transmembrane transport;GO:1903352//L-ornithine transmembrane transport;GO:1903401//L-lysine transmembrane tr…
ENST00000551988	ENSG00000003989	6.28x10⁻⁵	PAH-213	SLC7A2	GO:0005886//plasma membrane;GO:0005887//integral component of plasma membrane;GO:0016020//membrane;GO:0016021//integral component of membrane;GO:0030054//cell junction	GO:0000064//L-ornithine transmembrane transporter activity;GO:0008324//cation transmembrane transporter activity;GO:0008514//organic anion transmembrane transporter activity;GO:0015171//amino acid transmembrane transporter activity;GO:0015174//basic amino acid transmembrane transporter activity;GO:0015179//L-amino acid transmembrane transporter activity;GO:0015189//L-lysine transmembrane transpor…	GO:0006865//amino acid transport;GO:0015807//L-amino acid transport;GO:0055085//transmembrane transport;GO:0089718//amino acid import across plasma membrane;GO:0097638//L-arginine import across plasma membrane;GO:0150104//transport across blood-brain barrier;GO:1902475//L-alpha-amino acid transmembrane transport;GO:1903352//L-ornithine transmembrane transport;GO:1903401//L-lysine transmembrane tr…
ENST00000567093	ENSG00000003989	2.08x10⁻³	-	SLC7A2	GO:0005886//plasma membrane;GO:0005887//integral component of plasma membrane;GO:0016020//membrane;GO:0016021//integral component of membrane;GO:0030054//cell junction	GO:0000064//L-ornithine transmembrane transporter activity;GO:0008324//cation transmembrane transporter activity;GO:0008514//organic anion transmembrane transporter activity;GO:0015171//amino acid transmembrane transporter activity;GO:0015174//basic amino acid transmembrane transporter activity;GO:0015179//L-amino acid transmembrane transporter activity;GO:0015189//L-lysine transmembrane transpor…	GO:0006865//amino acid transport;GO:0015807//L-amino acid transport;GO:0055085//transmembrane transport;GO:0089718//amino acid import across plasma membrane;GO:0097638//L-arginine import across plasma membrane;GO:0150104//transport across blood-brain barrier;GO:1902475//L-alpha-amino acid transmembrane transport;GO:1903352//L-ornithine transmembrane transport;GO:1903401//L-lysine transmembrane tr…
ENST00000567832	ENSG00000003989	4.93x10⁻⁴	-	SLC7A2	GO:0005886//plasma membrane;GO:0005887//integral component of plasma membrane;GO:0016020//membrane;GO:0016021//integral component of membrane;GO:0030054//cell junction	GO:0000064//L-ornithine transmembrane transporter activity;GO:0008324//cation transmembrane transporter activity;GO:0008514//organic anion transmembrane transporter activity;GO:0015171//amino acid transmembrane transporter activity;GO:0015174//basic amino acid transmembrane transporter activity;GO:0015179//L-amino acid transmembrane transporter activity;GO:0015189//L-lysine transmembrane transpor…	GO:0006865//amino acid transport;GO:0015807//L-amino acid transport;GO:0055085//transmembrane transport;GO:0089718//amino acid import across plasma membrane;GO:0097638//L-arginine import across plasma membrane;GO:0150104//transport across blood-brain barrier;GO:1902475//L-alpha-amino acid transmembrane transport;GO:1903352//L-ornithine transmembrane transport;GO:1903401//L-lysine transmembrane tr…
ENST00000577038	ENSG00000003989	2.14x10⁻³	MMD-203	SLC7A2	GO:0005886//plasma membrane;GO:0005887//integral component of plasma membrane;GO:0016020//membrane;GO:0016021//integral component of membrane;GO:0030054//cell junction	GO:0000064//L-ornithine transmembrane transporter activity;GO:0008324//cation transmembrane transporter activity;GO:0008514//organic anion transmembrane transporter activity;GO:0015171//amino acid transmembrane transporter activity;GO:0015174//basic amino acid transmembrane transporter activity;GO:0015179//L-amino acid transmembrane transporter activity;GO:0015189//L-lysine transmembrane transpor…	GO:0006865//amino acid transport;GO:0015807//L-amino acid transport;GO:0055085//transmembrane transport;GO:0089718//amino acid import across plasma membrane;GO:0097638//L-arginine import across plasma membrane;GO:0150104//transport across blood-brain barrier;GO:1902475//L-alpha-amino acid transmembrane transport;GO:1903352//L-ornithine transmembrane transport;GO:1903401//L-lysine transmembrane tr…
ENST00000590797	ENSG00000003989	1.04x10⁻⁴	MIR122HG-201	SLC7A2	GO:0005886//plasma membrane;GO:0005887//integral component of plasma membrane;GO:0016020//membrane;GO:0016021//integral component of membrane;GO:0030054//cell junction	GO:0000064//L-ornithine transmembrane transporter activity;GO:0008324//cation transmembrane transporter activity;GO:0008514//organic anion transmembrane transporter activity;GO:0015171//amino acid transmembrane transporter activity;GO:0015174//basic amino acid transmembrane transporter activity;GO:0015179//L-amino acid transmembrane transporter activity;GO:0015189//L-lysine transmembrane transpor…	GO:0006865//amino acid transport;GO:0015807//L-amino acid transport;GO:0055085//transmembrane transport;GO:0089718//amino acid import across plasma membrane;GO:0097638//L-arginine import across plasma membrane;GO:0150104//transport across blood-brain barrier;GO:1902475//L-alpha-amino acid transmembrane transport;GO:1903352//L-ornithine transmembrane transport;GO:1903401//L-lysine transmembrane tr…
ENST00000606242	ENSG00000003989	2.29x10⁻³	LINC01836-202	SLC7A2	GO:0005886//plasma membrane;GO:0005887//integral component of plasma membrane;GO:0016020//membrane;GO:0016021//integral component of membrane;GO:0030054//cell junction	GO:0000064//L-ornithine transmembrane transporter activity;GO:0008324//cation transmembrane transporter activity;GO:0008514//organic anion transmembrane transporter activity;GO:0015171//amino acid transmembrane transporter activity;GO:0015174//basic amino acid transmembrane transporter activity;GO:0015179//L-amino acid transmembrane transporter activity;GO:0015189//L-lysine transmembrane transpor…	GO:0006865//amino acid transport;GO:0015807//L-amino acid transport;GO:0055085//transmembrane transport;GO:0089718//amino acid import across plasma membrane;GO:0097638//L-arginine import across plasma membrane;GO:0150104//transport across blood-brain barrier;GO:1902475//L-alpha-amino acid transmembrane transport;GO:1903352//L-ornithine transmembrane transport;GO:1903401//L-lysine transmembrane tr…
ENST00000613291	ENSG00000003989	7.45x10⁻⁴	-	SLC7A2	GO:0005886//plasma membrane;GO:0005887//integral component of plasma membrane;GO:0016020//membrane;GO:0016021//integral component of membrane;GO:0030054//cell junction	GO:0000064//L-ornithine transmembrane transporter activity;GO:0008324//cation transmembrane transporter activity;GO:0008514//organic anion transmembrane transporter activity;GO:0015171//amino acid transmembrane transporter activity;GO:0015174//basic amino acid transmembrane transporter activity;GO:0015179//L-amino acid transmembrane transporter activity;GO:0015189//L-lysine transmembrane transpor…	GO:0006865//amino acid transport;GO:0015807//L-amino acid transport;GO:0055085//transmembrane transport;GO:0089718//amino acid import across plasma membrane;GO:0097638//L-arginine import across plasma membrane;GO:0150104//transport across blood-brain barrier;GO:1902475//L-alpha-amino acid transmembrane transport;GO:1903352//L-ornithine transmembrane transport;GO:1903401//L-lysine transmembrane tr…
ENST00000631190	ENSG00000003989	5.82x10⁻⁴	LINC00294-201	SLC7A2	GO:0005886//plasma membrane;GO:0005887//integral component of plasma membrane;GO:0016020//membrane;GO:0016021//integral component of membrane;GO:0030054//cell junction	GO:0000064//L-ornithine transmembrane transporter activity;GO:0008324//cation transmembrane transporter activity;GO:0008514//organic anion transmembrane transporter activity;GO:0015171//amino acid transmembrane transporter activity;GO:0015174//basic amino acid transmembrane transporter activity;GO:0015179//L-amino acid transmembrane transporter activity;GO:0015189//L-lysine transmembrane transpor…	GO:0006865//amino acid transport;GO:0015807//L-amino acid transport;GO:0055085//transmembrane transport;GO:0089718//amino acid import across plasma membrane;GO:0097638//L-arginine import across plasma membrane;GO:0150104//transport across blood-brain barrier;GO:1902475//L-alpha-amino acid transmembrane transport;GO:1903352//L-ornithine transmembrane transport;GO:1903401//L-lysine transmembrane tr…
ENST00000659781	ENSG00000003989	1.66x10⁻⁴	LINC02432-207	SLC7A2	GO:0005886//plasma membrane;GO:0005887//integral component of plasma membrane;GO:0016020//membrane;GO:0016021//integral component of membrane;GO:0030054//cell junction	GO:0000064//L-ornithine transmembrane transporter activity;GO:0008324//cation transmembrane transporter activity;GO:0008514//organic anion transmembrane transporter activity;GO:0015171//amino acid transmembrane transporter activity;GO:0015174//basic amino acid transmembrane transporter activity;GO:0015179//L-amino acid transmembrane transporter activity;GO:0015189//L-lysine transmembrane transpor…	GO:0006865//amino acid transport;GO:0015807//L-amino acid transport;GO:0055085//transmembrane transport;GO:0089718//amino acid import across plasma membrane;GO:0097638//L-arginine import across plasma membrane;GO:0150104//transport across blood-brain barrier;GO:1902475//L-alpha-amino acid transmembrane transport;GO:1903352//L-ornithine transmembrane transport;GO:1903401//L-lysine transmembrane tr…
ENST00000665646	ENSG00000003989	1.60x10⁻³	SNHG29-245	SLC7A2	GO:0005886//plasma membrane;GO:0005887//integral component of plasma membrane;GO:0016020//membrane;GO:0016021//integral component of membrane;GO:0030054//cell junction	GO:0000064//L-ornithine transmembrane transporter activity;GO:0008324//cation transmembrane transporter activity;GO:0008514//organic anion transmembrane transporter activity;GO:0015171//amino acid transmembrane transporter activity;GO:0015174//basic amino acid transmembrane transporter activity;GO:0015179//L-amino acid transmembrane transporter activity;GO:0015189//L-lysine transmembrane transpor…	GO:0006865//amino acid transport;GO:0015807//L-amino acid transport;GO:0055085//transmembrane transport;GO:0089718//amino acid import across plasma membrane;GO:0097638//L-arginine import across plasma membrane;GO:0150104//transport across blood-brain barrier;GO:1902475//L-alpha-amino acid transmembrane transport;GO:1903352//L-ornithine transmembrane transport;GO:1903401//L-lysine transmembrane tr…
ENST00000667119	ENSG00000003989	4.98x10⁻⁴	SNHG15-212	SLC7A2	GO:0005886//plasma membrane;GO:0005887//integral component of plasma membrane;GO:0016020//membrane;GO:0016021//integral component of membrane;GO:0030054//cell junction	GO:0000064//L-ornithine transmembrane transporter activity;GO:0008324//cation transmembrane transporter activity;GO:0008514//organic anion transmembrane transporter activity;GO:0015171//amino acid transmembrane transporter activity;GO:0015174//basic amino acid transmembrane transporter activity;GO:0015179//L-amino acid transmembrane transporter activity;GO:0015189//L-lysine transmembrane transpor…	GO:0006865//amino acid transport;GO:0015807//L-amino acid transport;GO:0055085//transmembrane transport;GO:0089718//amino acid import across plasma membrane;GO:0097638//L-arginine import across plasma membrane;GO:0150104//transport across blood-brain barrier;GO:1902475//L-alpha-amino acid transmembrane transport;GO:1903352//L-ornithine transmembrane transport;GO:1903401//L-lysine transmembrane tr…
ENST00000678054	ENSG00000003989	7.60x10⁻⁴	KPNA2-218	SLC7A2	GO:0005886//plasma membrane;GO:0005887//integral component of plasma membrane;GO:0016020//membrane;GO:0016021//integral component of membrane;GO:0030054//cell junction	GO:0000064//L-ornithine transmembrane transporter activity;GO:0008324//cation transmembrane transporter activity;GO:0008514//organic anion transmembrane transporter activity;GO:0015171//amino acid transmembrane transporter activity;GO:0015174//basic amino acid transmembrane transporter activity;GO:0015179//L-amino acid transmembrane transporter activity;GO:0015189//L-lysine transmembrane transpor…	GO:0006865//amino acid transport;GO:0015807//L-amino acid transport;GO:0055085//transmembrane transport;GO:0089718//amino acid import across plasma membrane;GO:0097638//L-arginine import across plasma membrane;GO:0150104//transport across blood-brain barrier;GO:1902475//L-alpha-amino acid transmembrane transport;GO:1903352//L-ornithine transmembrane transport;GO:1903401//L-lysine transmembrane tr…
ENST00000684189	ENSG00000003989	1.82x10⁻³	EXT1-204	SLC7A2	GO:0005886//plasma membrane;GO:0005887//integral component of plasma membrane;GO:0016020//membrane;GO:0016021//integral component of membrane;GO:0030054//cell junction	GO:0000064//L-ornithine transmembrane transporter activity;GO:0008324//cation transmembrane transporter activity;GO:0008514//organic anion transmembrane transporter activity;GO:0015171//amino acid transmembrane transporter activity;GO:0015174//basic amino acid transmembrane transporter activity;GO:0015179//L-amino acid transmembrane transporter activity;GO:0015189//L-lysine transmembrane transpor…	GO:0006865//amino acid transport;GO:0015807//L-amino acid transport;GO:0055085//transmembrane transport;GO:0089718//amino acid import across plasma membrane;GO:0097638//L-arginine import across plasma membrane;GO:0150104//transport across blood-brain barrier;GO:1902475//L-alpha-amino acid transmembrane transport;GO:1903352//L-ornithine transmembrane transport;GO:1903401//L-lysine transmembrane tr…
ENST00000687035	ENSG00000003989	2.24x10⁻³	-	SLC7A2	GO:0005886//plasma membrane;GO:0005887//integral component of plasma membrane;GO:0016020//membrane;GO:0016021//integral component of membrane;GO:0030054//cell junction	GO:0000064//L-ornithine transmembrane transporter activity;GO:0008324//cation transmembrane transporter activity;GO:0008514//organic anion transmembrane transporter activity;GO:0015171//amino acid transmembrane transporter activity;GO:0015174//basic amino acid transmembrane transporter activity;GO:0015179//L-amino acid transmembrane transporter activity;GO:0015189//L-lysine transmembrane transpor…	GO:0006865//amino acid transport;GO:0015807//L-amino acid transport;GO:0055085//transmembrane transport;GO:0089718//amino acid import across plasma membrane;GO:0097638//L-arginine import across plasma membrane;GO:0150104//transport across blood-brain barrier;GO:1902475//L-alpha-amino acid transmembrane transport;GO:1903352//L-ornithine transmembrane transport;GO:1903401//L-lysine transmembrane tr…
ENST00000687575	ENSG00000003989	2.24x10⁻³	-	SLC7A2	GO:0005886//plasma membrane;GO:0005887//integral component of plasma membrane;GO:0016020//membrane;GO:0016021//integral component of membrane;GO:0030054//cell junction	GO:0000064//L-ornithine transmembrane transporter activity;GO:0008324//cation transmembrane transporter activity;GO:0008514//organic anion transmembrane transporter activity;GO:0015171//amino acid transmembrane transporter activity;GO:0015174//basic amino acid transmembrane transporter activity;GO:0015179//L-amino acid transmembrane transporter activity;GO:0015189//L-lysine transmembrane transpor…	GO:0006865//amino acid transport;GO:0015807//L-amino acid transport;GO:0055085//transmembrane transport;GO:0089718//amino acid import across plasma membrane;GO:0097638//L-arginine import across plasma membrane;GO:0150104//transport across blood-brain barrier;GO:1902475//L-alpha-amino acid transmembrane transport;GO:1903352//L-ornithine transmembrane transport;GO:1903401//L-lysine transmembrane tr…
MSTRG.12503.1	ENSG00000003989	3.24x10⁻³	-	SLC7A2	GO:0005886//plasma membrane;GO:0005887//integral component of plasma membrane;GO:0016020//membrane;GO:0016021//integral component of membrane;GO:0030054//cell junction	GO:0000064//L-ornithine transmembrane transporter activity;GO:0008324//cation transmembrane transporter activity;GO:0008514//organic anion transmembrane transporter activity;GO:0015171//amino acid transmembrane transporter activity;GO:0015174//basic amino acid transmembrane transporter activity;GO:0015179//L-amino acid transmembrane transporter activity;GO:0015189//L-lysine transmembrane transpor…	GO:0006865//amino acid transport;GO:0015807//L-amino acid transport;GO:0055085//transmembrane transport;GO:0089718//amino acid import across plasma membrane;GO:0097638//L-arginine import across plasma membrane;GO:0150104//transport across blood-brain barrier;GO:1902475//L-alpha-amino acid transmembrane transport;GO:1903352//L-ornithine transmembrane transport;GO:1903401//L-lysine transmembrane tr…
MSTRG.14271.16	ENSG00000003989	3.49x10⁻⁴	-	SLC7A2	GO:0005886//plasma membrane;GO:0005887//integral component of plasma membrane;GO:0016020//membrane;GO:0016021//integral component of membrane;GO:0030054//cell junction	GO:0000064//L-ornithine transmembrane transporter activity;GO:0008324//cation transmembrane transporter activity;GO:0008514//organic anion transmembrane transporter activity;GO:0015171//amino acid transmembrane transporter activity;GO:0015174//basic amino acid transmembrane transporter activity;GO:0015179//L-amino acid transmembrane transporter activity;GO:0015189//L-lysine transmembrane transpor…	GO:0006865//amino acid transport;GO:0015807//L-amino acid transport;GO:0055085//transmembrane transport;GO:0089718//amino acid import across plasma membrane;GO:0097638//L-arginine import across plasma membrane;GO:0150104//transport across blood-brain barrier;GO:1902475//L-alpha-amino acid transmembrane transport;GO:1903352//L-ornithine transmembrane transport;GO:1903401//L-lysine transmembrane tr…
MSTRG.15431.31	ENSG00000003989	2.54x10⁻³	-	SLC7A2	GO:0005886//plasma membrane;GO:0005887//integral component of plasma membrane;GO:0016020//membrane;GO:0016021//integral component of membrane;GO:0030054//cell junction	GO:0000064//L-ornithine transmembrane transporter activity;GO:0008324//cation transmembrane transporter activity;GO:0008514//organic anion transmembrane transporter activity;GO:0015171//amino acid transmembrane transporter activity;GO:0015174//basic amino acid transmembrane transporter activity;GO:0015179//L-amino acid transmembrane transporter activity;GO:0015189//L-lysine transmembrane transpor…	GO:0006865//amino acid transport;GO:0015807//L-amino acid transport;GO:0055085//transmembrane transport;GO:0089718//amino acid import across plasma membrane;GO:0097638//L-arginine import across plasma membrane;GO:0150104//transport across blood-brain barrier;GO:1902475//L-alpha-amino acid transmembrane transport;GO:1903352//L-ornithine transmembrane transport;GO:1903401//L-lysine transmembrane tr…
MSTRG.16535.1	ENSG00000003989	3.40x10⁻³	-	SLC7A2	GO:0005886//plasma membrane;GO:0005887//integral component of plasma membrane;GO:0016020//membrane;GO:0016021//integral component of membrane;GO:0030054//cell junction	GO:0000064//L-ornithine transmembrane transporter activity;GO:0008324//cation transmembrane transporter activity;GO:0008514//organic anion transmembrane transporter activity;GO:0015171//amino acid transmembrane transporter activity;GO:0015174//basic amino acid transmembrane transporter activity;GO:0015179//L-amino acid transmembrane transporter activity;GO:0015189//L-lysine transmembrane transpor…	GO:0006865//amino acid transport;GO:0015807//L-amino acid transport;GO:0055085//transmembrane transport;GO:0089718//amino acid import across plasma membrane;GO:0097638//L-arginine import across plasma membrane;GO:0150104//transport across blood-brain barrier;GO:1902475//L-alpha-amino acid transmembrane transport;GO:1903352//L-ornithine transmembrane transport;GO:1903401//L-lysine transmembrane tr…
MSTRG.18096.17	ENSG00000003989	6.73x10⁻⁴	-	SLC7A2	GO:0005886//plasma membrane;GO:0005887//integral component of plasma membrane;GO:0016020//membrane;GO:0016021//integral component of membrane;GO:0030054//cell junction	GO:0000064//L-ornithine transmembrane transporter activity;GO:0008324//cation transmembrane transporter activity;GO:0008514//organic anion transmembrane transporter activity;GO:0015171//amino acid transmembrane transporter activity;GO:0015174//basic amino acid transmembrane transporter activity;GO:0015179//L-amino acid transmembrane transporter activity;GO:0015189//L-lysine transmembrane transpor…	GO:0006865//amino acid transport;GO:0015807//L-amino acid transport;GO:0055085//transmembrane transport;GO:0089718//amino acid import across plasma membrane;GO:0097638//L-arginine import across plasma membrane;GO:0150104//transport across blood-brain barrier;GO:1902475//L-alpha-amino acid transmembrane transport;GO:1903352//L-ornithine transmembrane transport;GO:1903401//L-lysine transmembrane tr…
MSTRG.19223.2	ENSG00000003989	2.29x10⁻⁴	-	SLC7A2	GO:0005886//plasma membrane;GO:0005887//integral component of plasma membrane;GO:0016020//membrane;GO:0016021//integral component of membrane;GO:0030054//cell junction	GO:0000064//L-ornithine transmembrane transporter activity;GO:0008324//cation transmembrane transporter activity;GO:0008514//organic anion transmembrane transporter activity;GO:0015171//amino acid transmembrane transporter activity;GO:0015174//basic amino acid transmembrane transporter activity;GO:0015179//L-amino acid transmembrane transporter activity;GO:0015189//L-lysine transmembrane transpor…	GO:0006865//amino acid transport;GO:0015807//L-amino acid transport;GO:0055085//transmembrane transport;GO:0089718//amino acid import across plasma membrane;GO:0097638//L-arginine import across plasma membrane;GO:0150104//transport across blood-brain barrier;GO:1902475//L-alpha-amino acid transmembrane transport;GO:1903352//L-ornithine transmembrane transport;GO:1903401//L-lysine transmembrane tr…
MSTRG.19223.5	ENSG00000003989	2.15x10⁻⁴	-	SLC7A2	GO:0005886//plasma membrane;GO:0005887//integral component of plasma membrane;GO:0016020//membrane;GO:0016021//integral component of membrane;GO:0030054//cell junction	GO:0000064//L-ornithine transmembrane transporter activity;GO:0008324//cation transmembrane transporter activity;GO:0008514//organic anion transmembrane transporter activity;GO:0015171//amino acid transmembrane transporter activity;GO:0015174//basic amino acid transmembrane transporter activity;GO:0015179//L-amino acid transmembrane transporter activity;GO:0015189//L-lysine transmembrane transpor…	GO:0006865//amino acid transport;GO:0015807//L-amino acid transport;GO:0055085//transmembrane transport;GO:0089718//amino acid import across plasma membrane;GO:0097638//L-arginine import across plasma membrane;GO:0150104//transport across blood-brain barrier;GO:1902475//L-alpha-amino acid transmembrane transport;GO:1903352//L-ornithine transmembrane transport;GO:1903401//L-lysine transmembrane tr…
MSTRG.19229.3	ENSG00000003989	6.89x10⁻⁴	-	SLC7A2	GO:0005886//plasma membrane;GO:0005887//integral component of plasma membrane;GO:0016020//membrane;GO:0016021//integral component of membrane;GO:0030054//cell junction	GO:0000064//L-ornithine transmembrane transporter activity;GO:0008324//cation transmembrane transporter activity;GO:0008514//organic anion transmembrane transporter activity;GO:0015171//amino acid transmembrane transporter activity;GO:0015174//basic amino acid transmembrane transporter activity;GO:0015179//L-amino acid transmembrane transporter activity;GO:0015189//L-lysine transmembrane transpor…	GO:0006865//amino acid transport;GO:0015807//L-amino acid transport;GO:0055085//transmembrane transport;GO:0089718//amino acid import across plasma membrane;GO:0097638//L-arginine import across plasma membrane;GO:0150104//transport across blood-brain barrier;GO:1902475//L-alpha-amino acid transmembrane transport;GO:1903352//L-ornithine transmembrane transport;GO:1903401//L-lysine transmembrane tr…
MSTRG.19288.1	ENSG00000003989	2.02x10⁻³	-	SLC7A2	GO:0005886//plasma membrane;GO:0005887//integral component of plasma membrane;GO:0016020//membrane;GO:0016021//integral component of membrane;GO:0030054//cell junction	GO:0000064//L-ornithine transmembrane transporter activity;GO:0008324//cation transmembrane transporter activity;GO:0008514//organic anion transmembrane transporter activity;GO:0015171//amino acid transmembrane transporter activity;GO:0015174//basic amino acid transmembrane transporter activity;GO:0015179//L-amino acid transmembrane transporter activity;GO:0015189//L-lysine transmembrane transpor…	GO:0006865//amino acid transport;GO:0015807//L-amino acid transport;GO:0055085//transmembrane transport;GO:0089718//amino acid import across plasma membrane;GO:0097638//L-arginine import across plasma membrane;GO:0150104//transport across blood-brain barrier;GO:1902475//L-alpha-amino acid transmembrane transport;GO:1903352//L-ornithine transmembrane transport;GO:1903401//L-lysine transmembrane tr…
MSTRG.19288.2	ENSG00000003989	1.21x10⁻⁵	-	SLC7A2	GO:0005886//plasma membrane;GO:0005887//integral component of plasma membrane;GO:0016020//membrane;GO:0016021//integral component of membrane;GO:0030054//cell junction	GO:0000064//L-ornithine transmembrane transporter activity;GO:0008324//cation transmembrane transporter activity;GO:0008514//organic anion transmembrane transporter activity;GO:0015171//amino acid transmembrane transporter activity;GO:0015174//basic amino acid transmembrane transporter activity;GO:0015179//L-amino acid transmembrane transporter activity;GO:0015189//L-lysine transmembrane transpor…	GO:0006865//amino acid transport;GO:0015807//L-amino acid transport;GO:0055085//transmembrane transport;GO:0089718//amino acid import across plasma membrane;GO:0097638//L-arginine import across plasma membrane;GO:0150104//transport across blood-brain barrier;GO:1902475//L-alpha-amino acid transmembrane transport;GO:1903352//L-ornithine transmembrane transport;GO:1903401//L-lysine transmembrane tr…
MSTRG.23072.1	ENSG00000003989	1.55x10⁻³	-	SLC7A2	GO:0005886//plasma membrane;GO:0005887//integral component of plasma membrane;GO:0016020//membrane;GO:0016021//integral component of membrane;GO:0030054//cell junction	GO:0000064//L-ornithine transmembrane transporter activity;GO:0008324//cation transmembrane transporter activity;GO:0008514//organic anion transmembrane transporter activity;GO:0015171//amino acid transmembrane transporter activity;GO:0015174//basic amino acid transmembrane transporter activity;GO:0015179//L-amino acid transmembrane transporter activity;GO:0015189//L-lysine transmembrane transpor…	GO:0006865//amino acid transport;GO:0015807//L-amino acid transport;GO:0055085//transmembrane transport;GO:0089718//amino acid import across plasma membrane;GO:0097638//L-arginine import across plasma membrane;GO:0150104//transport across blood-brain barrier;GO:1902475//L-alpha-amino acid transmembrane transport;GO:1903352//L-ornithine transmembrane transport;GO:1903401//L-lysine transmembrane tr…
MSTRG.25218.2	ENSG00000003989	2.68x10⁻³	-	SLC7A2	GO:0005886//plasma membrane;GO:0005887//integral component of plasma membrane;GO:0016020//membrane;GO:0016021//integral component of membrane;GO:0030054//cell junction	GO:0000064//L-ornithine transmembrane transporter activity;GO:0008324//cation transmembrane transporter activity;GO:0008514//organic anion transmembrane transporter activity;GO:0015171//amino acid transmembrane transporter activity;GO:0015174//basic amino acid transmembrane transporter activity;GO:0015179//L-amino acid transmembrane transporter activity;GO:0015189//L-lysine transmembrane transpor…	GO:0006865//amino acid transport;GO:0015807//L-amino acid transport;GO:0055085//transmembrane transport;GO:0089718//amino acid import across plasma membrane;GO:0097638//L-arginine import across plasma membrane;GO:0150104//transport across blood-brain barrier;GO:1902475//L-alpha-amino acid transmembrane transport;GO:1903352//L-ornithine transmembrane transport;GO:1903401//L-lysine transmembrane tr…
MSTRG.2527.1	ENSG00000003989	2.38x10⁻³	-	SLC7A2	GO:0005886//plasma membrane;GO:0005887//integral component of plasma membrane;GO:0016020//membrane;GO:0016021//integral component of membrane;GO:0030054//cell junction	GO:0000064//L-ornithine transmembrane transporter activity;GO:0008324//cation transmembrane transporter activity;GO:0008514//organic anion transmembrane transporter activity;GO:0015171//amino acid transmembrane transporter activity;GO:0015174//basic amino acid transmembrane transporter activity;GO:0015179//L-amino acid transmembrane transporter activity;GO:0015189//L-lysine transmembrane transpor…	GO:0006865//amino acid transport;GO:0015807//L-amino acid transport;GO:0055085//transmembrane transport;GO:0089718//amino acid import across plasma membrane;GO:0097638//L-arginine import across plasma membrane;GO:0150104//transport across blood-brain barrier;GO:1902475//L-alpha-amino acid transmembrane transport;GO:1903352//L-ornithine transmembrane transport;GO:1903401//L-lysine transmembrane tr…
MSTRG.25695.1	ENSG00000003989	1.93x10⁻⁴	-	SLC7A2	GO:0005886//plasma membrane;GO:0005887//integral component of plasma membrane;GO:0016020//membrane;GO:0016021//integral component of membrane;GO:0030054//cell junction	GO:0000064//L-ornithine transmembrane transporter activity;GO:0008324//cation transmembrane transporter activity;GO:0008514//organic anion transmembrane transporter activity;GO:0015171//amino acid transmembrane transporter activity;GO:0015174//basic amino acid transmembrane transporter activity;GO:0015179//L-amino acid transmembrane transporter activity;GO:0015189//L-lysine transmembrane transpor…	GO:0006865//amino acid transport;GO:0015807//L-amino acid transport;GO:0055085//transmembrane transport;GO:0089718//amino acid import across plasma membrane;GO:0097638//L-arginine import across plasma membrane;GO:0150104//transport across blood-brain barrier;GO:1902475//L-alpha-amino acid transmembrane transport;GO:1903352//L-ornithine transmembrane transport;GO:1903401//L-lysine transmembrane tr…
MSTRG.484.6	ENSG00000003989	7.73x10⁻⁴	-	SLC7A2	GO:0005886//plasma membrane;GO:0005887//integral component of plasma membrane;GO:0016020//membrane;GO:0016021//integral component of membrane;GO:0030054//cell junction	GO:0000064//L-ornithine transmembrane transporter activity;GO:0008324//cation transmembrane transporter activity;GO:0008514//organic anion transmembrane transporter activity;GO:0015171//amino acid transmembrane transporter activity;GO:0015174//basic amino acid transmembrane transporter activity;GO:0015179//L-amino acid transmembrane transporter activity;GO:0015189//L-lysine transmembrane transpor…	GO:0006865//amino acid transport;GO:0015807//L-amino acid transport;GO:0055085//transmembrane transport;GO:0089718//amino acid import across plasma membrane;GO:0097638//L-arginine import across plasma membrane;GO:0150104//transport across blood-brain barrier;GO:1902475//L-alpha-amino acid transmembrane transport;GO:1903352//L-ornithine transmembrane transport;GO:1903401//L-lysine transmembrane tr…
MSTRG.6201.1	ENSG00000003989	1.04x10⁻³	-	SLC7A2	GO:0005886//plasma membrane;GO:0005887//integral component of plasma membrane;GO:0016020//membrane;GO:0016021//integral component of membrane;GO:0030054//cell junction	GO:0000064//L-ornithine transmembrane transporter activity;GO:0008324//cation transmembrane transporter activity;GO:0008514//organic anion transmembrane transporter activity;GO:0015171//amino acid transmembrane transporter activity;GO:0015174//basic amino acid transmembrane transporter activity;GO:0015179//L-amino acid transmembrane transporter activity;GO:0015189//L-lysine transmembrane transpor…	GO:0006865//amino acid transport;GO:0015807//L-amino acid transport;GO:0055085//transmembrane transport;GO:0089718//amino acid import across plasma membrane;GO:0097638//L-arginine import across plasma membrane;GO:0150104//transport across blood-brain barrier;GO:1902475//L-alpha-amino acid transmembrane transport;GO:1903352//L-ornithine transmembrane transport;GO:1903401//L-lysine transmembrane tr…
MSTRG.7204.1	ENSG00000003989	2.51x10⁻³	-	SLC7A2	GO:0005886//plasma membrane;GO:0005887//integral component of plasma membrane;GO:0016020//membrane;GO:0016021//integral component of membrane;GO:0030054//cell junction	GO:0000064//L-ornithine transmembrane transporter activity;GO:0008324//cation transmembrane transporter activity;GO:0008514//organic anion transmembrane transporter activity;GO:0015171//amino acid transmembrane transporter activity;GO:0015174//basic amino acid transmembrane transporter activity;GO:0015179//L-amino acid transmembrane transporter activity;GO:0015189//L-lysine transmembrane transpor…	GO:0006865//amino acid transport;GO:0015807//L-amino acid transport;GO:0055085//transmembrane transport;GO:0089718//amino acid import across plasma membrane;GO:0097638//L-arginine import across plasma membrane;GO:0150104//transport across blood-brain barrier;GO:1902475//L-alpha-amino acid transmembrane transport;GO:1903352//L-ornithine transmembrane transport;GO:1903401//L-lysine transmembrane tr…
ENST00000355197	ENSG00000004139	2.60x10⁻³	AQP10-202	SARM1	GO:0005737//cytoplasm;GO:0005739//mitochondrion;GO:0005829//cytosol;GO:0005874//microtubule;GO:0015630//microtubule cytoskeleton;GO:0030054//cell junction;GO:0030424//axon;GO:0030425//dendrite;GO:0031315//extrinsic component of mitochondrial outer membrane;GO:0042995//cell projection;GO:0045202//synapse	GO:0003953//NAD+ nucleosidase activity;GO:0005515//protein binding;GO:0016787//hydrolase activity;GO:0016798//hydrolase activity, acting on glycosyl bonds;GO:0035591//signaling adaptor activity;GO:0042802//identical protein binding;GO:0050135//NAD(P)+ nucleosidase activity;GO:0061809//NAD+ nucleotidase, cyclic ADP-ribose generating	GO:0002376//immune system process;GO:0006796//phosphate-containing compound metabolic process;GO:0007165//signal transduction;GO:0007399//nervous system development;GO:0009749//response to glucose;GO:0019677//NAD catabolic process;GO:0030154//cell differentiation;GO:0034128//negative regulation of MyD88-independent toll-like receptor signaling pathway;GO:0042981//regulation of apoptotic process;G…
ENST00000357517	ENSG00000004139	9.07x10⁻⁴	PCDH1-202	SARM1	GO:0005737//cytoplasm;GO:0005739//mitochondrion;GO:0005829//cytosol;GO:0005874//microtubule;GO:0015630//microtubule cytoskeleton;GO:0030054//cell junction;GO:0030424//axon;GO:0030425//dendrite;GO:0031315//extrinsic component of mitochondrial outer membrane;GO:0042995//cell projection;GO:0045202//synapse	GO:0003953//NAD+ nucleosidase activity;GO:0005515//protein binding;GO:0016787//hydrolase activity;GO:0016798//hydrolase activity, acting on glycosyl bonds;GO:0035591//signaling adaptor activity;GO:0042802//identical protein binding;GO:0050135//NAD(P)+ nucleosidase activity;GO:0061809//NAD+ nucleotidase, cyclic ADP-ribose generating	GO:0002376//immune system process;GO:0006796//phosphate-containing compound metabolic process;GO:0007165//signal transduction;GO:0007399//nervous system development;GO:0009749//response to glucose;GO:0019677//NAD catabolic process;GO:0030154//cell differentiation;GO:0034128//negative regulation of MyD88-independent toll-like receptor signaling pathway;GO:0042981//regulation of apoptotic process;G…
ENST00000424684	ENSG00000004139	2.15x10⁻³	LINC02591-201	SARM1	GO:0005737//cytoplasm;GO:0005739//mitochondrion;GO:0005829//cytosol;GO:0005874//microtubule;GO:0015630//microtubule cytoskeleton;GO:0030054//cell junction;GO:0030424//axon;GO:0030425//dendrite;GO:0031315//extrinsic component of mitochondrial outer membrane;GO:0042995//cell projection;GO:0045202//synapse	GO:0003953//NAD+ nucleosidase activity;GO:0005515//protein binding;GO:0016787//hydrolase activity;GO:0016798//hydrolase activity, acting on glycosyl bonds;GO:0035591//signaling adaptor activity;GO:0042802//identical protein binding;GO:0050135//NAD(P)+ nucleosidase activity;GO:0061809//NAD+ nucleotidase, cyclic ADP-ribose generating	GO:0002376//immune system process;GO:0006796//phosphate-containing compound metabolic process;GO:0007165//signal transduction;GO:0007399//nervous system development;GO:0009749//response to glucose;GO:0019677//NAD catabolic process;GO:0030154//cell differentiation;GO:0034128//negative regulation of MyD88-independent toll-like receptor signaling pathway;GO:0042981//regulation of apoptotic process;G…
ENST00000426112	ENSG00000004139	4.74x10⁻⁴	LINC02925-201	SARM1	GO:0005737//cytoplasm;GO:0005739//mitochondrion;GO:0005829//cytosol;GO:0005874//microtubule;GO:0015630//microtubule cytoskeleton;GO:0030054//cell junction;GO:0030424//axon;GO:0030425//dendrite;GO:0031315//extrinsic component of mitochondrial outer membrane;GO:0042995//cell projection;GO:0045202//synapse	GO:0003953//NAD+ nucleosidase activity;GO:0005515//protein binding;GO:0016787//hydrolase activity;GO:0016798//hydrolase activity, acting on glycosyl bonds;GO:0035591//signaling adaptor activity;GO:0042802//identical protein binding;GO:0050135//NAD(P)+ nucleosidase activity;GO:0061809//NAD+ nucleotidase, cyclic ADP-ribose generating	GO:0002376//immune system process;GO:0006796//phosphate-containing compound metabolic process;GO:0007165//signal transduction;GO:0007399//nervous system development;GO:0009749//response to glucose;GO:0019677//NAD catabolic process;GO:0030154//cell differentiation;GO:0034128//negative regulation of MyD88-independent toll-like receptor signaling pathway;GO:0042981//regulation of apoptotic process;G…
ENST00000436880	ENSG00000004139	8.09x10⁻⁵	MIR181A1HG-203	SARM1	GO:0005737//cytoplasm;GO:0005739//mitochondrion;GO:0005829//cytosol;GO:0005874//microtubule;GO:0015630//microtubule cytoskeleton;GO:0030054//cell junction;GO:0030424//axon;GO:0030425//dendrite;GO:0031315//extrinsic component of mitochondrial outer membrane;GO:0042995//cell projection;GO:0045202//synapse	GO:0003953//NAD+ nucleosidase activity;GO:0005515//protein binding;GO:0016787//hydrolase activity;GO:0016798//hydrolase activity, acting on glycosyl bonds;GO:0035591//signaling adaptor activity;GO:0042802//identical protein binding;GO:0050135//NAD(P)+ nucleosidase activity;GO:0061809//NAD+ nucleotidase, cyclic ADP-ribose generating	GO:0002376//immune system process;GO:0006796//phosphate-containing compound metabolic process;GO:0007165//signal transduction;GO:0007399//nervous system development;GO:0009749//response to glucose;GO:0019677//NAD catabolic process;GO:0030154//cell differentiation;GO:0034128//negative regulation of MyD88-independent toll-like receptor signaling pathway;GO:0042981//regulation of apoptotic process;G…
ENST00000449995	ENSG00000004139	2.51x10⁻⁴	RPS4XP5-202	SARM1	GO:0005737//cytoplasm;GO:0005739//mitochondrion;GO:0005829//cytosol;GO:0005874//microtubule;GO:0015630//microtubule cytoskeleton;GO:0030054//cell junction;GO:0030424//axon;GO:0030425//dendrite;GO:0031315//extrinsic component of mitochondrial outer membrane;GO:0042995//cell projection;GO:0045202//synapse	GO:0003953//NAD+ nucleosidase activity;GO:0005515//protein binding;GO:0016787//hydrolase activity;GO:0016798//hydrolase activity, acting on glycosyl bonds;GO:0035591//signaling adaptor activity;GO:0042802//identical protein binding;GO:0050135//NAD(P)+ nucleosidase activity;GO:0061809//NAD+ nucleotidase, cyclic ADP-ribose generating	GO:0002376//immune system process;GO:0006796//phosphate-containing compound metabolic process;GO:0007165//signal transduction;GO:0007399//nervous system development;GO:0009749//response to glucose;GO:0019677//NAD catabolic process;GO:0030154//cell differentiation;GO:0034128//negative regulation of MyD88-independent toll-like receptor signaling pathway;GO:0042981//regulation of apoptotic process;G…
ENST00000456775	ENSG00000004139	9.54x10⁻⁴	ST7-AS1-201	SARM1	GO:0005737//cytoplasm;GO:0005739//mitochondrion;GO:0005829//cytosol;GO:0005874//microtubule;GO:0015630//microtubule cytoskeleton;GO:0030054//cell junction;GO:0030424//axon;GO:0030425//dendrite;GO:0031315//extrinsic component of mitochondrial outer membrane;GO:0042995//cell projection;GO:0045202//synapse	GO:0003953//NAD+ nucleosidase activity;GO:0005515//protein binding;GO:0016787//hydrolase activity;GO:0016798//hydrolase activity, acting on glycosyl bonds;GO:0035591//signaling adaptor activity;GO:0042802//identical protein binding;GO:0050135//NAD(P)+ nucleosidase activity;GO:0061809//NAD+ nucleotidase, cyclic ADP-ribose generating	GO:0002376//immune system process;GO:0006796//phosphate-containing compound metabolic process;GO:0007165//signal transduction;GO:0007399//nervous system development;GO:0009749//response to glucose;GO:0019677//NAD catabolic process;GO:0030154//cell differentiation;GO:0034128//negative regulation of MyD88-independent toll-like receptor signaling pathway;GO:0042981//regulation of apoptotic process;G…
ENST00000467205	ENSG00000004139	2.60x10⁻⁴	ADGRF2-202	SARM1	GO:0005737//cytoplasm;GO:0005739//mitochondrion;GO:0005829//cytosol;GO:0005874//microtubule;GO:0015630//microtubule cytoskeleton;GO:0030054//cell junction;GO:0030424//axon;GO:0030425//dendrite;GO:0031315//extrinsic component of mitochondrial outer membrane;GO:0042995//cell projection;GO:0045202//synapse	GO:0003953//NAD+ nucleosidase activity;GO:0005515//protein binding;GO:0016787//hydrolase activity;GO:0016798//hydrolase activity, acting on glycosyl bonds;GO:0035591//signaling adaptor activity;GO:0042802//identical protein binding;GO:0050135//NAD(P)+ nucleosidase activity;GO:0061809//NAD+ nucleotidase, cyclic ADP-ribose generating	GO:0002376//immune system process;GO:0006796//phosphate-containing compound metabolic process;GO:0007165//signal transduction;GO:0007399//nervous system development;GO:0009749//response to glucose;GO:0019677//NAD catabolic process;GO:0030154//cell differentiation;GO:0034128//negative regulation of MyD88-independent toll-like receptor signaling pathway;GO:0042981//regulation of apoptotic process;G…
ENST00000467242	ENSG00000004139	4.38x10⁻⁴	LBH-208	SARM1	GO:0005737//cytoplasm;GO:0005739//mitochondrion;GO:0005829//cytosol;GO:0005874//microtubule;GO:0015630//microtubule cytoskeleton;GO:0030054//cell junction;GO:0030424//axon;GO:0030425//dendrite;GO:0031315//extrinsic component of mitochondrial outer membrane;GO:0042995//cell projection;GO:0045202//synapse	GO:0003953//NAD+ nucleosidase activity;GO:0005515//protein binding;GO:0016787//hydrolase activity;GO:0016798//hydrolase activity, acting on glycosyl bonds;GO:0035591//signaling adaptor activity;GO:0042802//identical protein binding;GO:0050135//NAD(P)+ nucleosidase activity;GO:0061809//NAD+ nucleotidase, cyclic ADP-ribose generating	GO:0002376//immune system process;GO:0006796//phosphate-containing compound metabolic process;GO:0007165//signal transduction;GO:0007399//nervous system development;GO:0009749//response to glucose;GO:0019677//NAD catabolic process;GO:0030154//cell differentiation;GO:0034128//negative regulation of MyD88-independent toll-like receptor signaling pathway;GO:0042981//regulation of apoptotic process;G…
ENST00000480356	ENSG00000004139	3.23x10⁻³	F3-204	SARM1	GO:0005737//cytoplasm;GO:0005739//mitochondrion;GO:0005829//cytosol;GO:0005874//microtubule;GO:0015630//microtubule cytoskeleton;GO:0030054//cell junction;GO:0030424//axon;GO:0030425//dendrite;GO:0031315//extrinsic component of mitochondrial outer membrane;GO:0042995//cell projection;GO:0045202//synapse	GO:0003953//NAD+ nucleosidase activity;GO:0005515//protein binding;GO:0016787//hydrolase activity;GO:0016798//hydrolase activity, acting on glycosyl bonds;GO:0035591//signaling adaptor activity;GO:0042802//identical protein binding;GO:0050135//NAD(P)+ nucleosidase activity;GO:0061809//NAD+ nucleotidase, cyclic ADP-ribose generating	GO:0002376//immune system process;GO:0006796//phosphate-containing compound metabolic process;GO:0007165//signal transduction;GO:0007399//nervous system development;GO:0009749//response to glucose;GO:0019677//NAD catabolic process;GO:0030154//cell differentiation;GO:0034128//negative regulation of MyD88-independent toll-like receptor signaling pathway;GO:0042981//regulation of apoptotic process;G…
ENST00000481165	ENSG00000004139	1.05x10⁻⁴	TINAGL1-209	SARM1	GO:0005737//cytoplasm;GO:0005739//mitochondrion;GO:0005829//cytosol;GO:0005874//microtubule;GO:0015630//microtubule cytoskeleton;GO:0030054//cell junction;GO:0030424//axon;GO:0030425//dendrite;GO:0031315//extrinsic component of mitochondrial outer membrane;GO:0042995//cell projection;GO:0045202//synapse	GO:0003953//NAD+ nucleosidase activity;GO:0005515//protein binding;GO:0016787//hydrolase activity;GO:0016798//hydrolase activity, acting on glycosyl bonds;GO:0035591//signaling adaptor activity;GO:0042802//identical protein binding;GO:0050135//NAD(P)+ nucleosidase activity;GO:0061809//NAD+ nucleotidase, cyclic ADP-ribose generating	GO:0002376//immune system process;GO:0006796//phosphate-containing compound metabolic process;GO:0007165//signal transduction;GO:0007399//nervous system development;GO:0009749//response to glucose;GO:0019677//NAD catabolic process;GO:0030154//cell differentiation;GO:0034128//negative regulation of MyD88-independent toll-like receptor signaling pathway;GO:0042981//regulation of apoptotic process;G…
ENST00000482775	ENSG00000004139	8.57x10⁻⁴	CRYAA-205	SARM1	GO:0005737//cytoplasm;GO:0005739//mitochondrion;GO:0005829//cytosol;GO:0005874//microtubule;GO:0015630//microtubule cytoskeleton;GO:0030054//cell junction;GO:0030424//axon;GO:0030425//dendrite;GO:0031315//extrinsic component of mitochondrial outer membrane;GO:0042995//cell projection;GO:0045202//synapse	GO:0003953//NAD+ nucleosidase activity;GO:0005515//protein binding;GO:0016787//hydrolase activity;GO:0016798//hydrolase activity, acting on glycosyl bonds;GO:0035591//signaling adaptor activity;GO:0042802//identical protein binding;GO:0050135//NAD(P)+ nucleosidase activity;GO:0061809//NAD+ nucleotidase, cyclic ADP-ribose generating	GO:0002376//immune system process;GO:0006796//phosphate-containing compound metabolic process;GO:0007165//signal transduction;GO:0007399//nervous system development;GO:0009749//response to glucose;GO:0019677//NAD catabolic process;GO:0030154//cell differentiation;GO:0034128//negative regulation of MyD88-independent toll-like receptor signaling pathway;GO:0042981//regulation of apoptotic process;G…
ENST00000485684	ENSG00000004139	9.30x10⁻⁴	NRP2-217	SARM1	GO:0005737//cytoplasm;GO:0005739//mitochondrion;GO:0005829//cytosol;GO:0005874//microtubule;GO:0015630//microtubule cytoskeleton;GO:0030054//cell junction;GO:0030424//axon;GO:0030425//dendrite;GO:0031315//extrinsic component of mitochondrial outer membrane;GO:0042995//cell projection;GO:0045202//synapse	GO:0003953//NAD+ nucleosidase activity;GO:0005515//protein binding;GO:0016787//hydrolase activity;GO:0016798//hydrolase activity, acting on glycosyl bonds;GO:0035591//signaling adaptor activity;GO:0042802//identical protein binding;GO:0050135//NAD(P)+ nucleosidase activity;GO:0061809//NAD+ nucleotidase, cyclic ADP-ribose generating	GO:0002376//immune system process;GO:0006796//phosphate-containing compound metabolic process;GO:0007165//signal transduction;GO:0007399//nervous system development;GO:0009749//response to glucose;GO:0019677//NAD catabolic process;GO:0030154//cell differentiation;GO:0034128//negative regulation of MyD88-independent toll-like receptor signaling pathway;GO:0042981//regulation of apoptotic process;G…
ENST00000488996	ENSG00000004139	1.08x10⁻⁶	ORAI2-206	SARM1	GO:0005737//cytoplasm;GO:0005739//mitochondrion;GO:0005829//cytosol;GO:0005874//microtubule;GO:0015630//microtubule cytoskeleton;GO:0030054//cell junction;GO:0030424//axon;GO:0030425//dendrite;GO:0031315//extrinsic component of mitochondrial outer membrane;GO:0042995//cell projection;GO:0045202//synapse	GO:0003953//NAD+ nucleosidase activity;GO:0005515//protein binding;GO:0016787//hydrolase activity;GO:0016798//hydrolase activity, acting on glycosyl bonds;GO:0035591//signaling adaptor activity;GO:0042802//identical protein binding;GO:0050135//NAD(P)+ nucleosidase activity;GO:0061809//NAD+ nucleotidase, cyclic ADP-ribose generating	GO:0002376//immune system process;GO:0006796//phosphate-containing compound metabolic process;GO:0007165//signal transduction;GO:0007399//nervous system development;GO:0009749//response to glucose;GO:0019677//NAD catabolic process;GO:0030154//cell differentiation;GO:0034128//negative regulation of MyD88-independent toll-like receptor signaling pathway;GO:0042981//regulation of apoptotic process;G…
ENST00000500986	ENSG00000004139	2.82x10⁻⁵	SOCS2-AS1-202	SARM1	GO:0005737//cytoplasm;GO:0005739//mitochondrion;GO:0005829//cytosol;GO:0005874//microtubule;GO:0015630//microtubule cytoskeleton;GO:0030054//cell junction;GO:0030424//axon;GO:0030425//dendrite;GO:0031315//extrinsic component of mitochondrial outer membrane;GO:0042995//cell projection;GO:0045202//synapse	GO:0003953//NAD+ nucleosidase activity;GO:0005515//protein binding;GO:0016787//hydrolase activity;GO:0016798//hydrolase activity, acting on glycosyl bonds;GO:0035591//signaling adaptor activity;GO:0042802//identical protein binding;GO:0050135//NAD(P)+ nucleosidase activity;GO:0061809//NAD+ nucleotidase, cyclic ADP-ribose generating	GO:0002376//immune system process;GO:0006796//phosphate-containing compound metabolic process;GO:0007165//signal transduction;GO:0007399//nervous system development;GO:0009749//response to glucose;GO:0019677//NAD catabolic process;GO:0030154//cell differentiation;GO:0034128//negative regulation of MyD88-independent toll-like receptor signaling pathway;GO:0042981//regulation of apoptotic process;G…
ENST00000501740	ENSG00000004139	2.12x10⁻³	ACSM3-203	SARM1	GO:0005737//cytoplasm;GO:0005739//mitochondrion;GO:0005829//cytosol;GO:0005874//microtubule;GO:0015630//microtubule cytoskeleton;GO:0030054//cell junction;GO:0030424//axon;GO:0030425//dendrite;GO:0031315//extrinsic component of mitochondrial outer membrane;GO:0042995//cell projection;GO:0045202//synapse	GO:0003953//NAD+ nucleosidase activity;GO:0005515//protein binding;GO:0016787//hydrolase activity;GO:0016798//hydrolase activity, acting on glycosyl bonds;GO:0035591//signaling adaptor activity;GO:0042802//identical protein binding;GO:0050135//NAD(P)+ nucleosidase activity;GO:0061809//NAD+ nucleotidase, cyclic ADP-ribose generating	GO:0002376//immune system process;GO:0006796//phosphate-containing compound metabolic process;GO:0007165//signal transduction;GO:0007399//nervous system development;GO:0009749//response to glucose;GO:0019677//NAD catabolic process;GO:0030154//cell differentiation;GO:0034128//negative regulation of MyD88-independent toll-like receptor signaling pathway;GO:0042981//regulation of apoptotic process;G…
ENST00000505448	ENSG00000004139	4.42x10⁻⁵	-	SARM1	GO:0005737//cytoplasm;GO:0005739//mitochondrion;GO:0005829//cytosol;GO:0005874//microtubule;GO:0015630//microtubule cytoskeleton;GO:0030054//cell junction;GO:0030424//axon;GO:0030425//dendrite;GO:0031315//extrinsic component of mitochondrial outer membrane;GO:0042995//cell projection;GO:0045202//synapse	GO:0003953//NAD+ nucleosidase activity;GO:0005515//protein binding;GO:0016787//hydrolase activity;GO:0016798//hydrolase activity, acting on glycosyl bonds;GO:0035591//signaling adaptor activity;GO:0042802//identical protein binding;GO:0050135//NAD(P)+ nucleosidase activity;GO:0061809//NAD+ nucleotidase, cyclic ADP-ribose generating	GO:0002376//immune system process;GO:0006796//phosphate-containing compound metabolic process;GO:0007165//signal transduction;GO:0007399//nervous system development;GO:0009749//response to glucose;GO:0019677//NAD catabolic process;GO:0030154//cell differentiation;GO:0034128//negative regulation of MyD88-independent toll-like receptor signaling pathway;GO:0042981//regulation of apoptotic process;G…
ENST00000511497	ENSG00000004139	8.96x10⁻⁵	LINC02615-204	SARM1	GO:0005737//cytoplasm;GO:0005739//mitochondrion;GO:0005829//cytosol;GO:0005874//microtubule;GO:0015630//microtubule cytoskeleton;GO:0030054//cell junction;GO:0030424//axon;GO:0030425//dendrite;GO:0031315//extrinsic component of mitochondrial outer membrane;GO:0042995//cell projection;GO:0045202//synapse	GO:0003953//NAD+ nucleosidase activity;GO:0005515//protein binding;GO:0016787//hydrolase activity;GO:0016798//hydrolase activity, acting on glycosyl bonds;GO:0035591//signaling adaptor activity;GO:0042802//identical protein binding;GO:0050135//NAD(P)+ nucleosidase activity;GO:0061809//NAD+ nucleotidase, cyclic ADP-ribose generating	GO:0002376//immune system process;GO:0006796//phosphate-containing compound metabolic process;GO:0007165//signal transduction;GO:0007399//nervous system development;GO:0009749//response to glucose;GO:0019677//NAD catabolic process;GO:0030154//cell differentiation;GO:0034128//negative regulation of MyD88-independent toll-like receptor signaling pathway;GO:0042981//regulation of apoptotic process;G…
ENST00000530490	ENSG00000004139	2.59x10⁻³	OR7E14P-202	SARM1	GO:0005737//cytoplasm;GO:0005739//mitochondrion;GO:0005829//cytosol;GO:0005874//microtubule;GO:0015630//microtubule cytoskeleton;GO:0030054//cell junction;GO:0030424//axon;GO:0030425//dendrite;GO:0031315//extrinsic component of mitochondrial outer membrane;GO:0042995//cell projection;GO:0045202//synapse	GO:0003953//NAD+ nucleosidase activity;GO:0005515//protein binding;GO:0016787//hydrolase activity;GO:0016798//hydrolase activity, acting on glycosyl bonds;GO:0035591//signaling adaptor activity;GO:0042802//identical protein binding;GO:0050135//NAD(P)+ nucleosidase activity;GO:0061809//NAD+ nucleotidase, cyclic ADP-ribose generating	GO:0002376//immune system process;GO:0006796//phosphate-containing compound metabolic process;GO:0007165//signal transduction;GO:0007399//nervous system development;GO:0009749//response to glucose;GO:0019677//NAD catabolic process;GO:0030154//cell differentiation;GO:0034128//negative regulation of MyD88-independent toll-like receptor signaling pathway;GO:0042981//regulation of apoptotic process;G…
ENST00000546267	ENSG00000004139	1.54x10⁻⁴	NPIPA9-209	SARM1	GO:0005737//cytoplasm;GO:0005739//mitochondrion;GO:0005829//cytosol;GO:0005874//microtubule;GO:0015630//microtubule cytoskeleton;GO:0030054//cell junction;GO:0030424//axon;GO:0030425//dendrite;GO:0031315//extrinsic component of mitochondrial outer membrane;GO:0042995//cell projection;GO:0045202//synapse	GO:0003953//NAD+ nucleosidase activity;GO:0005515//protein binding;GO:0016787//hydrolase activity;GO:0016798//hydrolase activity, acting on glycosyl bonds;GO:0035591//signaling adaptor activity;GO:0042802//identical protein binding;GO:0050135//NAD(P)+ nucleosidase activity;GO:0061809//NAD+ nucleotidase, cyclic ADP-ribose generating	GO:0002376//immune system process;GO:0006796//phosphate-containing compound metabolic process;GO:0007165//signal transduction;GO:0007399//nervous system development;GO:0009749//response to glucose;GO:0019677//NAD catabolic process;GO:0030154//cell differentiation;GO:0034128//negative regulation of MyD88-independent toll-like receptor signaling pathway;GO:0042981//regulation of apoptotic process;G…
ENST00000559183	ENSG00000004139	2.87x10⁻⁴	UACA-207	SARM1	GO:0005737//cytoplasm;GO:0005739//mitochondrion;GO:0005829//cytosol;GO:0005874//microtubule;GO:0015630//microtubule cytoskeleton;GO:0030054//cell junction;GO:0030424//axon;GO:0030425//dendrite;GO:0031315//extrinsic component of mitochondrial outer membrane;GO:0042995//cell projection;GO:0045202//synapse	GO:0003953//NAD+ nucleosidase activity;GO:0005515//protein binding;GO:0016787//hydrolase activity;GO:0016798//hydrolase activity, acting on glycosyl bonds;GO:0035591//signaling adaptor activity;GO:0042802//identical protein binding;GO:0050135//NAD(P)+ nucleosidase activity;GO:0061809//NAD+ nucleotidase, cyclic ADP-ribose generating	GO:0002376//immune system process;GO:0006796//phosphate-containing compound metabolic process;GO:0007165//signal transduction;GO:0007399//nervous system development;GO:0009749//response to glucose;GO:0019677//NAD catabolic process;GO:0030154//cell differentiation;GO:0034128//negative regulation of MyD88-independent toll-like receptor signaling pathway;GO:0042981//regulation of apoptotic process;G…
ENST00000562811	ENSG00000004139	2.32x10⁻⁴	LINC00622-201	SARM1	GO:0005737//cytoplasm;GO:0005739//mitochondrion;GO:0005829//cytosol;GO:0005874//microtubule;GO:0015630//microtubule cytoskeleton;GO:0030054//cell junction;GO:0030424//axon;GO:0030425//dendrite;GO:0031315//extrinsic component of mitochondrial outer membrane;GO:0042995//cell projection;GO:0045202//synapse	GO:0003953//NAD+ nucleosidase activity;GO:0005515//protein binding;GO:0016787//hydrolase activity;GO:0016798//hydrolase activity, acting on glycosyl bonds;GO:0035591//signaling adaptor activity;GO:0042802//identical protein binding;GO:0050135//NAD(P)+ nucleosidase activity;GO:0061809//NAD+ nucleotidase, cyclic ADP-ribose generating	GO:0002376//immune system process;GO:0006796//phosphate-containing compound metabolic process;GO:0007165//signal transduction;GO:0007399//nervous system development;GO:0009749//response to glucose;GO:0019677//NAD catabolic process;GO:0030154//cell differentiation;GO:0034128//negative regulation of MyD88-independent toll-like receptor signaling pathway;GO:0042981//regulation of apoptotic process;G…
ENST00000566349	ENSG00000004139	3.63x10⁻³	KLHDC4-215	SARM1	GO:0005737//cytoplasm;GO:0005739//mitochondrion;GO:0005829//cytosol;GO:0005874//microtubule;GO:0015630//microtubule cytoskeleton;GO:0030054//cell junction;GO:0030424//axon;GO:0030425//dendrite;GO:0031315//extrinsic component of mitochondrial outer membrane;GO:0042995//cell projection;GO:0045202//synapse	GO:0003953//NAD+ nucleosidase activity;GO:0005515//protein binding;GO:0016787//hydrolase activity;GO:0016798//hydrolase activity, acting on glycosyl bonds;GO:0035591//signaling adaptor activity;GO:0042802//identical protein binding;GO:0050135//NAD(P)+ nucleosidase activity;GO:0061809//NAD+ nucleotidase, cyclic ADP-ribose generating	GO:0002376//immune system process;GO:0006796//phosphate-containing compound metabolic process;GO:0007165//signal transduction;GO:0007399//nervous system development;GO:0009749//response to glucose;GO:0019677//NAD catabolic process;GO:0030154//cell differentiation;GO:0034128//negative regulation of MyD88-independent toll-like receptor signaling pathway;GO:0042981//regulation of apoptotic process;G…
ENST00000566733	ENSG00000004139	2.35x10⁻³	-	SARM1	GO:0005737//cytoplasm;GO:0005739//mitochondrion;GO:0005829//cytosol;GO:0005874//microtubule;GO:0015630//microtubule cytoskeleton;GO:0030054//cell junction;GO:0030424//axon;GO:0030425//dendrite;GO:0031315//extrinsic component of mitochondrial outer membrane;GO:0042995//cell projection;GO:0045202//synapse	GO:0003953//NAD+ nucleosidase activity;GO:0005515//protein binding;GO:0016787//hydrolase activity;GO:0016798//hydrolase activity, acting on glycosyl bonds;GO:0035591//signaling adaptor activity;GO:0042802//identical protein binding;GO:0050135//NAD(P)+ nucleosidase activity;GO:0061809//NAD+ nucleotidase, cyclic ADP-ribose generating	GO:0002376//immune system process;GO:0006796//phosphate-containing compound metabolic process;GO:0007165//signal transduction;GO:0007399//nervous system development;GO:0009749//response to glucose;GO:0019677//NAD catabolic process;GO:0030154//cell differentiation;GO:0034128//negative regulation of MyD88-independent toll-like receptor signaling pathway;GO:0042981//regulation of apoptotic process;G…
ENST00000587344	ENSG00000004139	2.36x10⁻⁵	LDLRAD4-209	SARM1	GO:0005737//cytoplasm;GO:0005739//mitochondrion;GO:0005829//cytosol;GO:0005874//microtubule;GO:0015630//microtubule cytoskeleton;GO:0030054//cell junction;GO:0030424//axon;GO:0030425//dendrite;GO:0031315//extrinsic component of mitochondrial outer membrane;GO:0042995//cell projection;GO:0045202//synapse	GO:0003953//NAD+ nucleosidase activity;GO:0005515//protein binding;GO:0016787//hydrolase activity;GO:0016798//hydrolase activity, acting on glycosyl bonds;GO:0035591//signaling adaptor activity;GO:0042802//identical protein binding;GO:0050135//NAD(P)+ nucleosidase activity;GO:0061809//NAD+ nucleotidase, cyclic ADP-ribose generating	GO:0002376//immune system process;GO:0006796//phosphate-containing compound metabolic process;GO:0007165//signal transduction;GO:0007399//nervous system development;GO:0009749//response to glucose;GO:0019677//NAD catabolic process;GO:0030154//cell differentiation;GO:0034128//negative regulation of MyD88-independent toll-like receptor signaling pathway;GO:0042981//regulation of apoptotic process;G…
ENST00000589759	ENSG00000004139	1.43x10⁻³	ATP6V0A1-223	SARM1	GO:0005737//cytoplasm;GO:0005739//mitochondrion;GO:0005829//cytosol;GO:0005874//microtubule;GO:0015630//microtubule cytoskeleton;GO:0030054//cell junction;GO:0030424//axon;GO:0030425//dendrite;GO:0031315//extrinsic component of mitochondrial outer membrane;GO:0042995//cell projection;GO:0045202//synapse	GO:0003953//NAD+ nucleosidase activity;GO:0005515//protein binding;GO:0016787//hydrolase activity;GO:0016798//hydrolase activity, acting on glycosyl bonds;GO:0035591//signaling adaptor activity;GO:0042802//identical protein binding;GO:0050135//NAD(P)+ nucleosidase activity;GO:0061809//NAD+ nucleotidase, cyclic ADP-ribose generating	GO:0002376//immune system process;GO:0006796//phosphate-containing compound metabolic process;GO:0007165//signal transduction;GO:0007399//nervous system development;GO:0009749//response to glucose;GO:0019677//NAD catabolic process;GO:0030154//cell differentiation;GO:0034128//negative regulation of MyD88-independent toll-like receptor signaling pathway;GO:0042981//regulation of apoptotic process;G…
ENST00000602510	ENSG00000004139	6.25x10⁻⁴	-	SARM1	GO:0005737//cytoplasm;GO:0005739//mitochondrion;GO:0005829//cytosol;GO:0005874//microtubule;GO:0015630//microtubule cytoskeleton;GO:0030054//cell junction;GO:0030424//axon;GO:0030425//dendrite;GO:0031315//extrinsic component of mitochondrial outer membrane;GO:0042995//cell projection;GO:0045202//synapse	GO:0003953//NAD+ nucleosidase activity;GO:0005515//protein binding;GO:0016787//hydrolase activity;GO:0016798//hydrolase activity, acting on glycosyl bonds;GO:0035591//signaling adaptor activity;GO:0042802//identical protein binding;GO:0050135//NAD(P)+ nucleosidase activity;GO:0061809//NAD+ nucleotidase, cyclic ADP-ribose generating	GO:0002376//immune system process;GO:0006796//phosphate-containing compound metabolic process;GO:0007165//signal transduction;GO:0007399//nervous system development;GO:0009749//response to glucose;GO:0019677//NAD catabolic process;GO:0030154//cell differentiation;GO:0034128//negative regulation of MyD88-independent toll-like receptor signaling pathway;GO:0042981//regulation of apoptotic process;G…
ENST00000603791	ENSG00000004139	2.62x10⁻³	-	SARM1	GO:0005737//cytoplasm;GO:0005739//mitochondrion;GO:0005829//cytosol;GO:0005874//microtubule;GO:0015630//microtubule cytoskeleton;GO:0030054//cell junction;GO:0030424//axon;GO:0030425//dendrite;GO:0031315//extrinsic component of mitochondrial outer membrane;GO:0042995//cell projection;GO:0045202//synapse	GO:0003953//NAD+ nucleosidase activity;GO:0005515//protein binding;GO:0016787//hydrolase activity;GO:0016798//hydrolase activity, acting on glycosyl bonds;GO:0035591//signaling adaptor activity;GO:0042802//identical protein binding;GO:0050135//NAD(P)+ nucleosidase activity;GO:0061809//NAD+ nucleotidase, cyclic ADP-ribose generating	GO:0002376//immune system process;GO:0006796//phosphate-containing compound metabolic process;GO:0007165//signal transduction;GO:0007399//nervous system development;GO:0009749//response to glucose;GO:0019677//NAD catabolic process;GO:0030154//cell differentiation;GO:0034128//negative regulation of MyD88-independent toll-like receptor signaling pathway;GO:0042981//regulation of apoptotic process;G…
ENST00000605917	ENSG00000004139	1.20x10⁻³	CASC15-204	SARM1	GO:0005737//cytoplasm;GO:0005739//mitochondrion;GO:0005829//cytosol;GO:0005874//microtubule;GO:0015630//microtubule cytoskeleton;GO:0030054//cell junction;GO:0030424//axon;GO:0030425//dendrite;GO:0031315//extrinsic component of mitochondrial outer membrane;GO:0042995//cell projection;GO:0045202//synapse	GO:0003953//NAD+ nucleosidase activity;GO:0005515//protein binding;GO:0016787//hydrolase activity;GO:0016798//hydrolase activity, acting on glycosyl bonds;GO:0035591//signaling adaptor activity;GO:0042802//identical protein binding;GO:0050135//NAD(P)+ nucleosidase activity;GO:0061809//NAD+ nucleotidase, cyclic ADP-ribose generating	GO:0002376//immune system process;GO:0006796//phosphate-containing compound metabolic process;GO:0007165//signal transduction;GO:0007399//nervous system development;GO:0009749//response to glucose;GO:0019677//NAD catabolic process;GO:0030154//cell differentiation;GO:0034128//negative regulation of MyD88-independent toll-like receptor signaling pathway;GO:0042981//regulation of apoptotic process;G…
ENST00000610128	ENSG00000004139	3.32x10⁻³	LINC02035-201	SARM1	GO:0005737//cytoplasm;GO:0005739//mitochondrion;GO:0005829//cytosol;GO:0005874//microtubule;GO:0015630//microtubule cytoskeleton;GO:0030054//cell junction;GO:0030424//axon;GO:0030425//dendrite;GO:0031315//extrinsic component of mitochondrial outer membrane;GO:0042995//cell projection;GO:0045202//synapse	GO:0003953//NAD+ nucleosidase activity;GO:0005515//protein binding;GO:0016787//hydrolase activity;GO:0016798//hydrolase activity, acting on glycosyl bonds;GO:0035591//signaling adaptor activity;GO:0042802//identical protein binding;GO:0050135//NAD(P)+ nucleosidase activity;GO:0061809//NAD+ nucleotidase, cyclic ADP-ribose generating	GO:0002376//immune system process;GO:0006796//phosphate-containing compound metabolic process;GO:0007165//signal transduction;GO:0007399//nervous system development;GO:0009749//response to glucose;GO:0019677//NAD catabolic process;GO:0030154//cell differentiation;GO:0034128//negative regulation of MyD88-independent toll-like receptor signaling pathway;GO:0042981//regulation of apoptotic process;G…
ENST00000614721	ENSG00000004139	5.73x10⁻⁴	ACSM3-215	SARM1	GO:0005737//cytoplasm;GO:0005739//mitochondrion;GO:0005829//cytosol;GO:0005874//microtubule;GO:0015630//microtubule cytoskeleton;GO:0030054//cell junction;GO:0030424//axon;GO:0030425//dendrite;GO:0031315//extrinsic component of mitochondrial outer membrane;GO:0042995//cell projection;GO:0045202//synapse	GO:0003953//NAD+ nucleosidase activity;GO:0005515//protein binding;GO:0016787//hydrolase activity;GO:0016798//hydrolase activity, acting on glycosyl bonds;GO:0035591//signaling adaptor activity;GO:0042802//identical protein binding;GO:0050135//NAD(P)+ nucleosidase activity;GO:0061809//NAD+ nucleotidase, cyclic ADP-ribose generating	GO:0002376//immune system process;GO:0006796//phosphate-containing compound metabolic process;GO:0007165//signal transduction;GO:0007399//nervous system development;GO:0009749//response to glucose;GO:0019677//NAD catabolic process;GO:0030154//cell differentiation;GO:0034128//negative regulation of MyD88-independent toll-like receptor signaling pathway;GO:0042981//regulation of apoptotic process;G…
ENST00000621778	ENSG00000004139	6.70x10⁻⁴	-	SARM1	GO:0005737//cytoplasm;GO:0005739//mitochondrion;GO:0005829//cytosol;GO:0005874//microtubule;GO:0015630//microtubule cytoskeleton;GO:0030054//cell junction;GO:0030424//axon;GO:0030425//dendrite;GO:0031315//extrinsic component of mitochondrial outer membrane;GO:0042995//cell projection;GO:0045202//synapse	GO:0003953//NAD+ nucleosidase activity;GO:0005515//protein binding;GO:0016787//hydrolase activity;GO:0016798//hydrolase activity, acting on glycosyl bonds;GO:0035591//signaling adaptor activity;GO:0042802//identical protein binding;GO:0050135//NAD(P)+ nucleosidase activity;GO:0061809//NAD+ nucleotidase, cyclic ADP-ribose generating	GO:0002376//immune system process;GO:0006796//phosphate-containing compound metabolic process;GO:0007165//signal transduction;GO:0007399//nervous system development;GO:0009749//response to glucose;GO:0019677//NAD catabolic process;GO:0030154//cell differentiation;GO:0034128//negative regulation of MyD88-independent toll-like receptor signaling pathway;GO:0042981//regulation of apoptotic process;G…
ENST00000632044	ENSG00000004139	3.15x10⁻⁴	-	SARM1	GO:0005737//cytoplasm;GO:0005739//mitochondrion;GO:0005829//cytosol;GO:0005874//microtubule;GO:0015630//microtubule cytoskeleton;GO:0030054//cell junction;GO:0030424//axon;GO:0030425//dendrite;GO:0031315//extrinsic component of mitochondrial outer membrane;GO:0042995//cell projection;GO:0045202//synapse	GO:0003953//NAD+ nucleosidase activity;GO:0005515//protein binding;GO:0016787//hydrolase activity;GO:0016798//hydrolase activity, acting on glycosyl bonds;GO:0035591//signaling adaptor activity;GO:0042802//identical protein binding;GO:0050135//NAD(P)+ nucleosidase activity;GO:0061809//NAD+ nucleotidase, cyclic ADP-ribose generating	GO:0002376//immune system process;GO:0006796//phosphate-containing compound metabolic process;GO:0007165//signal transduction;GO:0007399//nervous system development;GO:0009749//response to glucose;GO:0019677//NAD catabolic process;GO:0030154//cell differentiation;GO:0034128//negative regulation of MyD88-independent toll-like receptor signaling pathway;GO:0042981//regulation of apoptotic process;G…
ENST00000641433	ENSG00000004139	2.19x10⁻³	MIR193BHG-211	SARM1	GO:0005737//cytoplasm;GO:0005739//mitochondrion;GO:0005829//cytosol;GO:0005874//microtubule;GO:0015630//microtubule cytoskeleton;GO:0030054//cell junction;GO:0030424//axon;GO:0030425//dendrite;GO:0031315//extrinsic component of mitochondrial outer membrane;GO:0042995//cell projection;GO:0045202//synapse	GO:0003953//NAD+ nucleosidase activity;GO:0005515//protein binding;GO:0016787//hydrolase activity;GO:0016798//hydrolase activity, acting on glycosyl bonds;GO:0035591//signaling adaptor activity;GO:0042802//identical protein binding;GO:0050135//NAD(P)+ nucleosidase activity;GO:0061809//NAD+ nucleotidase, cyclic ADP-ribose generating	GO:0002376//immune system process;GO:0006796//phosphate-containing compound metabolic process;GO:0007165//signal transduction;GO:0007399//nervous system development;GO:0009749//response to glucose;GO:0019677//NAD catabolic process;GO:0030154//cell differentiation;GO:0034128//negative regulation of MyD88-independent toll-like receptor signaling pathway;GO:0042981//regulation of apoptotic process;G…
ENST00000644174	ENSG00000004139	1.97x10⁻³	UCA1-213	SARM1	GO:0005737//cytoplasm;GO:0005739//mitochondrion;GO:0005829//cytosol;GO:0005874//microtubule;GO:0015630//microtubule cytoskeleton;GO:0030054//cell junction;GO:0030424//axon;GO:0030425//dendrite;GO:0031315//extrinsic component of mitochondrial outer membrane;GO:0042995//cell projection;GO:0045202//synapse	GO:0003953//NAD+ nucleosidase activity;GO:0005515//protein binding;GO:0016787//hydrolase activity;GO:0016798//hydrolase activity, acting on glycosyl bonds;GO:0035591//signaling adaptor activity;GO:0042802//identical protein binding;GO:0050135//NAD(P)+ nucleosidase activity;GO:0061809//NAD+ nucleotidase, cyclic ADP-ribose generating	GO:0002376//immune system process;GO:0006796//phosphate-containing compound metabolic process;GO:0007165//signal transduction;GO:0007399//nervous system development;GO:0009749//response to glucose;GO:0019677//NAD catabolic process;GO:0030154//cell differentiation;GO:0034128//negative regulation of MyD88-independent toll-like receptor signaling pathway;GO:0042981//regulation of apoptotic process;G…
ENST00000646363	ENSG00000004139	7.11x10⁻⁴	CLEC16A-213	SARM1	GO:0005737//cytoplasm;GO:0005739//mitochondrion;GO:0005829//cytosol;GO:0005874//microtubule;GO:0015630//microtubule cytoskeleton;GO:0030054//cell junction;GO:0030424//axon;GO:0030425//dendrite;GO:0031315//extrinsic component of mitochondrial outer membrane;GO:0042995//cell projection;GO:0045202//synapse	GO:0003953//NAD+ nucleosidase activity;GO:0005515//protein binding;GO:0016787//hydrolase activity;GO:0016798//hydrolase activity, acting on glycosyl bonds;GO:0035591//signaling adaptor activity;GO:0042802//identical protein binding;GO:0050135//NAD(P)+ nucleosidase activity;GO:0061809//NAD+ nucleotidase, cyclic ADP-ribose generating	GO:0002376//immune system process;GO:0006796//phosphate-containing compound metabolic process;GO:0007165//signal transduction;GO:0007399//nervous system development;GO:0009749//response to glucose;GO:0019677//NAD catabolic process;GO:0030154//cell differentiation;GO:0034128//negative regulation of MyD88-independent toll-like receptor signaling pathway;GO:0042981//regulation of apoptotic process;G…
ENST00000654896	ENSG00000004139	1.92x10⁻³	-	SARM1	GO:0005737//cytoplasm;GO:0005739//mitochondrion;GO:0005829//cytosol;GO:0005874//microtubule;GO:0015630//microtubule cytoskeleton;GO:0030054//cell junction;GO:0030424//axon;GO:0030425//dendrite;GO:0031315//extrinsic component of mitochondrial outer membrane;GO:0042995//cell projection;GO:0045202//synapse	GO:0003953//NAD+ nucleosidase activity;GO:0005515//protein binding;GO:0016787//hydrolase activity;GO:0016798//hydrolase activity, acting on glycosyl bonds;GO:0035591//signaling adaptor activity;GO:0042802//identical protein binding;GO:0050135//NAD(P)+ nucleosidase activity;GO:0061809//NAD+ nucleotidase, cyclic ADP-ribose generating	GO:0002376//immune system process;GO:0006796//phosphate-containing compound metabolic process;GO:0007165//signal transduction;GO:0007399//nervous system development;GO:0009749//response to glucose;GO:0019677//NAD catabolic process;GO:0030154//cell differentiation;GO:0034128//negative regulation of MyD88-independent toll-like receptor signaling pathway;GO:0042981//regulation of apoptotic process;G…
ENST00000662621	ENSG00000004139	2.24x10⁻³	LINC02615-206	SARM1	GO:0005737//cytoplasm;GO:0005739//mitochondrion;GO:0005829//cytosol;GO:0005874//microtubule;GO:0015630//microtubule cytoskeleton;GO:0030054//cell junction;GO:0030424//axon;GO:0030425//dendrite;GO:0031315//extrinsic component of mitochondrial outer membrane;GO:0042995//cell projection;GO:0045202//synapse	GO:0003953//NAD+ nucleosidase activity;GO:0005515//protein binding;GO:0016787//hydrolase activity;GO:0016798//hydrolase activity, acting on glycosyl bonds;GO:0035591//signaling adaptor activity;GO:0042802//identical protein binding;GO:0050135//NAD(P)+ nucleosidase activity;GO:0061809//NAD+ nucleotidase, cyclic ADP-ribose generating	GO:0002376//immune system process;GO:0006796//phosphate-containing compound metabolic process;GO:0007165//signal transduction;GO:0007399//nervous system development;GO:0009749//response to glucose;GO:0019677//NAD catabolic process;GO:0030154//cell differentiation;GO:0034128//negative regulation of MyD88-independent toll-like receptor signaling pathway;GO:0042981//regulation of apoptotic process;G…
ENST00000663207	ENSG00000004139	8.23x10⁻⁵	-	SARM1	GO:0005737//cytoplasm;GO:0005739//mitochondrion;GO:0005829//cytosol;GO:0005874//microtubule;GO:0015630//microtubule cytoskeleton;GO:0030054//cell junction;GO:0030424//axon;GO:0030425//dendrite;GO:0031315//extrinsic component of mitochondrial outer membrane;GO:0042995//cell projection;GO:0045202//synapse	GO:0003953//NAD+ nucleosidase activity;GO:0005515//protein binding;GO:0016787//hydrolase activity;GO:0016798//hydrolase activity, acting on glycosyl bonds;GO:0035591//signaling adaptor activity;GO:0042802//identical protein binding;GO:0050135//NAD(P)+ nucleosidase activity;GO:0061809//NAD+ nucleotidase, cyclic ADP-ribose generating	GO:0002376//immune system process;GO:0006796//phosphate-containing compound metabolic process;GO:0007165//signal transduction;GO:0007399//nervous system development;GO:0009749//response to glucose;GO:0019677//NAD catabolic process;GO:0030154//cell differentiation;GO:0034128//negative regulation of MyD88-independent toll-like receptor signaling pathway;GO:0042981//regulation of apoptotic process;G…
ENST00000664676	ENSG00000004139	3.30x10⁻⁴	-	SARM1	GO:0005737//cytoplasm;GO:0005739//mitochondrion;GO:0005829//cytosol;GO:0005874//microtubule;GO:0015630//microtubule cytoskeleton;GO:0030054//cell junction;GO:0030424//axon;GO:0030425//dendrite;GO:0031315//extrinsic component of mitochondrial outer membrane;GO:0042995//cell projection;GO:0045202//synapse	GO:0003953//NAD+ nucleosidase activity;GO:0005515//protein binding;GO:0016787//hydrolase activity;GO:0016798//hydrolase activity, acting on glycosyl bonds;GO:0035591//signaling adaptor activity;GO:0042802//identical protein binding;GO:0050135//NAD(P)+ nucleosidase activity;GO:0061809//NAD+ nucleotidase, cyclic ADP-ribose generating	GO:0002376//immune system process;GO:0006796//phosphate-containing compound metabolic process;GO:0007165//signal transduction;GO:0007399//nervous system development;GO:0009749//response to glucose;GO:0019677//NAD catabolic process;GO:0030154//cell differentiation;GO:0034128//negative regulation of MyD88-independent toll-like receptor signaling pathway;GO:0042981//regulation of apoptotic process;G…
ENST00000676398	ENSG00000004139	3.40x10⁻³	HSPB1-219	SARM1	GO:0005737//cytoplasm;GO:0005739//mitochondrion;GO:0005829//cytosol;GO:0005874//microtubule;GO:0015630//microtubule cytoskeleton;GO:0030054//cell junction;GO:0030424//axon;GO:0030425//dendrite;GO:0031315//extrinsic component of mitochondrial outer membrane;GO:0042995//cell projection;GO:0045202//synapse	GO:0003953//NAD+ nucleosidase activity;GO:0005515//protein binding;GO:0016787//hydrolase activity;GO:0016798//hydrolase activity, acting on glycosyl bonds;GO:0035591//signaling adaptor activity;GO:0042802//identical protein binding;GO:0050135//NAD(P)+ nucleosidase activity;GO:0061809//NAD+ nucleotidase, cyclic ADP-ribose generating	GO:0002376//immune system process;GO:0006796//phosphate-containing compound metabolic process;GO:0007165//signal transduction;GO:0007399//nervous system development;GO:0009749//response to glucose;GO:0019677//NAD catabolic process;GO:0030154//cell differentiation;GO:0034128//negative regulation of MyD88-independent toll-like receptor signaling pathway;GO:0042981//regulation of apoptotic process;G…
ENST00000677367	ENSG00000004139	2.34x10⁻³	CTSH-241	SARM1	GO:0005737//cytoplasm;GO:0005739//mitochondrion;GO:0005829//cytosol;GO:0005874//microtubule;GO:0015630//microtubule cytoskeleton;GO:0030054//cell junction;GO:0030424//axon;GO:0030425//dendrite;GO:0031315//extrinsic component of mitochondrial outer membrane;GO:0042995//cell projection;GO:0045202//synapse	GO:0003953//NAD+ nucleosidase activity;GO:0005515//protein binding;GO:0016787//hydrolase activity;GO:0016798//hydrolase activity, acting on glycosyl bonds;GO:0035591//signaling adaptor activity;GO:0042802//identical protein binding;GO:0050135//NAD(P)+ nucleosidase activity;GO:0061809//NAD+ nucleotidase, cyclic ADP-ribose generating	GO:0002376//immune system process;GO:0006796//phosphate-containing compound metabolic process;GO:0007165//signal transduction;GO:0007399//nervous system development;GO:0009749//response to glucose;GO:0019677//NAD catabolic process;GO:0030154//cell differentiation;GO:0034128//negative regulation of MyD88-independent toll-like receptor signaling pathway;GO:0042981//regulation of apoptotic process;G…
ENST00000679303	ENSG00000004139	2.82x10⁻⁴	LDLRAD4-240	SARM1	GO:0005737//cytoplasm;GO:0005739//mitochondrion;GO:0005829//cytosol;GO:0005874//microtubule;GO:0015630//microtubule cytoskeleton;GO:0030054//cell junction;GO:0030424//axon;GO:0030425//dendrite;GO:0031315//extrinsic component of mitochondrial outer membrane;GO:0042995//cell projection;GO:0045202//synapse	GO:0003953//NAD+ nucleosidase activity;GO:0005515//protein binding;GO:0016787//hydrolase activity;GO:0016798//hydrolase activity, acting on glycosyl bonds;GO:0035591//signaling adaptor activity;GO:0042802//identical protein binding;GO:0050135//NAD(P)+ nucleosidase activity;GO:0061809//NAD+ nucleotidase, cyclic ADP-ribose generating	GO:0002376//immune system process;GO:0006796//phosphate-containing compound metabolic process;GO:0007165//signal transduction;GO:0007399//nervous system development;GO:0009749//response to glucose;GO:0019677//NAD catabolic process;GO:0030154//cell differentiation;GO:0034128//negative regulation of MyD88-independent toll-like receptor signaling pathway;GO:0042981//regulation of apoptotic process;G…
ENST00000684438	ENSG00000004139	6.68x10⁻⁴	FLRT2-211	SARM1	GO:0005737//cytoplasm;GO:0005739//mitochondrion;GO:0005829//cytosol;GO:0005874//microtubule;GO:0015630//microtubule cytoskeleton;GO:0030054//cell junction;GO:0030424//axon;GO:0030425//dendrite;GO:0031315//extrinsic component of mitochondrial outer membrane;GO:0042995//cell projection;GO:0045202//synapse	GO:0003953//NAD+ nucleosidase activity;GO:0005515//protein binding;GO:0016787//hydrolase activity;GO:0016798//hydrolase activity, acting on glycosyl bonds;GO:0035591//signaling adaptor activity;GO:0042802//identical protein binding;GO:0050135//NAD(P)+ nucleosidase activity;GO:0061809//NAD+ nucleotidase, cyclic ADP-ribose generating	GO:0002376//immune system process;GO:0006796//phosphate-containing compound metabolic process;GO:0007165//signal transduction;GO:0007399//nervous system development;GO:0009749//response to glucose;GO:0019677//NAD catabolic process;GO:0030154//cell differentiation;GO:0034128//negative regulation of MyD88-independent toll-like receptor signaling pathway;GO:0042981//regulation of apoptotic process;G…
ENST00000689248	ENSG00000004139	1.34x10⁻³	SNAP25-209	SARM1	GO:0005737//cytoplasm;GO:0005739//mitochondrion;GO:0005829//cytosol;GO:0005874//microtubule;GO:0015630//microtubule cytoskeleton;GO:0030054//cell junction;GO:0030424//axon;GO:0030425//dendrite;GO:0031315//extrinsic component of mitochondrial outer membrane;GO:0042995//cell projection;GO:0045202//synapse	GO:0003953//NAD+ nucleosidase activity;GO:0005515//protein binding;GO:0016787//hydrolase activity;GO:0016798//hydrolase activity, acting on glycosyl bonds;GO:0035591//signaling adaptor activity;GO:0042802//identical protein binding;GO:0050135//NAD(P)+ nucleosidase activity;GO:0061809//NAD+ nucleotidase, cyclic ADP-ribose generating	GO:0002376//immune system process;GO:0006796//phosphate-containing compound metabolic process;GO:0007165//signal transduction;GO:0007399//nervous system development;GO:0009749//response to glucose;GO:0019677//NAD catabolic process;GO:0030154//cell differentiation;GO:0034128//negative regulation of MyD88-independent toll-like receptor signaling pathway;GO:0042981//regulation of apoptotic process;G…
MSTRG.14649.16	ENSG00000004139	1.32x10⁻⁴	-	SARM1	GO:0005737//cytoplasm;GO:0005739//mitochondrion;GO:0005829//cytosol;GO:0005874//microtubule;GO:0015630//microtubule cytoskeleton;GO:0030054//cell junction;GO:0030424//axon;GO:0030425//dendrite;GO:0031315//extrinsic component of mitochondrial outer membrane;GO:0042995//cell projection;GO:0045202//synapse	GO:0003953//NAD+ nucleosidase activity;GO:0005515//protein binding;GO:0016787//hydrolase activity;GO:0016798//hydrolase activity, acting on glycosyl bonds;GO:0035591//signaling adaptor activity;GO:0042802//identical protein binding;GO:0050135//NAD(P)+ nucleosidase activity;GO:0061809//NAD+ nucleotidase, cyclic ADP-ribose generating	GO:0002376//immune system process;GO:0006796//phosphate-containing compound metabolic process;GO:0007165//signal transduction;GO:0007399//nervous system development;GO:0009749//response to glucose;GO:0019677//NAD catabolic process;GO:0030154//cell differentiation;GO:0034128//negative regulation of MyD88-independent toll-like receptor signaling pathway;GO:0042981//regulation of apoptotic process;G…
MSTRG.14662.1	ENSG00000004139	4.64x10⁻⁴	-	SARM1	GO:0005737//cytoplasm;GO:0005739//mitochondrion;GO:0005829//cytosol;GO:0005874//microtubule;GO:0015630//microtubule cytoskeleton;GO:0030054//cell junction;GO:0030424//axon;GO:0030425//dendrite;GO:0031315//extrinsic component of mitochondrial outer membrane;GO:0042995//cell projection;GO:0045202//synapse	GO:0003953//NAD+ nucleosidase activity;GO:0005515//protein binding;GO:0016787//hydrolase activity;GO:0016798//hydrolase activity, acting on glycosyl bonds;GO:0035591//signaling adaptor activity;GO:0042802//identical protein binding;GO:0050135//NAD(P)+ nucleosidase activity;GO:0061809//NAD+ nucleotidase, cyclic ADP-ribose generating	GO:0002376//immune system process;GO:0006796//phosphate-containing compound metabolic process;GO:0007165//signal transduction;GO:0007399//nervous system development;GO:0009749//response to glucose;GO:0019677//NAD catabolic process;GO:0030154//cell differentiation;GO:0034128//negative regulation of MyD88-independent toll-like receptor signaling pathway;GO:0042981//regulation of apoptotic process;G…
MSTRG.20602.1	ENSG00000004139	2.86x10⁻⁴	-	SARM1	GO:0005737//cytoplasm;GO:0005739//mitochondrion;GO:0005829//cytosol;GO:0005874//microtubule;GO:0015630//microtubule cytoskeleton;GO:0030054//cell junction;GO:0030424//axon;GO:0030425//dendrite;GO:0031315//extrinsic component of mitochondrial outer membrane;GO:0042995//cell projection;GO:0045202//synapse	GO:0003953//NAD+ nucleosidase activity;GO:0005515//protein binding;GO:0016787//hydrolase activity;GO:0016798//hydrolase activity, acting on glycosyl bonds;GO:0035591//signaling adaptor activity;GO:0042802//identical protein binding;GO:0050135//NAD(P)+ nucleosidase activity;GO:0061809//NAD+ nucleotidase, cyclic ADP-ribose generating	GO:0002376//immune system process;GO:0006796//phosphate-containing compound metabolic process;GO:0007165//signal transduction;GO:0007399//nervous system development;GO:0009749//response to glucose;GO:0019677//NAD catabolic process;GO:0030154//cell differentiation;GO:0034128//negative regulation of MyD88-independent toll-like receptor signaling pathway;GO:0042981//regulation of apoptotic process;G…
MSTRG.217.1	ENSG00000004139	4.65x10⁻⁴	-	SARM1	GO:0005737//cytoplasm;GO:0005739//mitochondrion;GO:0005829//cytosol;GO:0005874//microtubule;GO:0015630//microtubule cytoskeleton;GO:0030054//cell junction;GO:0030424//axon;GO:0030425//dendrite;GO:0031315//extrinsic component of mitochondrial outer membrane;GO:0042995//cell projection;GO:0045202//synapse	GO:0003953//NAD+ nucleosidase activity;GO:0005515//protein binding;GO:0016787//hydrolase activity;GO:0016798//hydrolase activity, acting on glycosyl bonds;GO:0035591//signaling adaptor activity;GO:0042802//identical protein binding;GO:0050135//NAD(P)+ nucleosidase activity;GO:0061809//NAD+ nucleotidase, cyclic ADP-ribose generating	GO:0002376//immune system process;GO:0006796//phosphate-containing compound metabolic process;GO:0007165//signal transduction;GO:0007399//nervous system development;GO:0009749//response to glucose;GO:0019677//NAD catabolic process;GO:0030154//cell differentiation;GO:0034128//negative regulation of MyD88-independent toll-like receptor signaling pathway;GO:0042981//regulation of apoptotic process;G…
MSTRG.27388.2	ENSG00000004139	3.11x10⁻⁴	-	SARM1	GO:0005737//cytoplasm;GO:0005739//mitochondrion;GO:0005829//cytosol;GO:0005874//microtubule;GO:0015630//microtubule cytoskeleton;GO:0030054//cell junction;GO:0030424//axon;GO:0030425//dendrite;GO:0031315//extrinsic component of mitochondrial outer membrane;GO:0042995//cell projection;GO:0045202//synapse	GO:0003953//NAD+ nucleosidase activity;GO:0005515//protein binding;GO:0016787//hydrolase activity;GO:0016798//hydrolase activity, acting on glycosyl bonds;GO:0035591//signaling adaptor activity;GO:0042802//identical protein binding;GO:0050135//NAD(P)+ nucleosidase activity;GO:0061809//NAD+ nucleotidase, cyclic ADP-ribose generating	GO:0002376//immune system process;GO:0006796//phosphate-containing compound metabolic process;GO:0007165//signal transduction;GO:0007399//nervous system development;GO:0009749//response to glucose;GO:0019677//NAD catabolic process;GO:0030154//cell differentiation;GO:0034128//negative regulation of MyD88-independent toll-like receptor signaling pathway;GO:0042981//regulation of apoptotic process;G…
MSTRG.2971.1	ENSG00000004139	2.60x10⁻³	-	SARM1	GO:0005737//cytoplasm;GO:0005739//mitochondrion;GO:0005829//cytosol;GO:0005874//microtubule;GO:0015630//microtubule cytoskeleton;GO:0030054//cell junction;GO:0030424//axon;GO:0030425//dendrite;GO:0031315//extrinsic component of mitochondrial outer membrane;GO:0042995//cell projection;GO:0045202//synapse	GO:0003953//NAD+ nucleosidase activity;GO:0005515//protein binding;GO:0016787//hydrolase activity;GO:0016798//hydrolase activity, acting on glycosyl bonds;GO:0035591//signaling adaptor activity;GO:0042802//identical protein binding;GO:0050135//NAD(P)+ nucleosidase activity;GO:0061809//NAD+ nucleotidase, cyclic ADP-ribose generating	GO:0002376//immune system process;GO:0006796//phosphate-containing compound metabolic process;GO:0007165//signal transduction;GO:0007399//nervous system development;GO:0009749//response to glucose;GO:0019677//NAD catabolic process;GO:0030154//cell differentiation;GO:0034128//negative regulation of MyD88-independent toll-like receptor signaling pathway;GO:0042981//regulation of apoptotic process;G…
MSTRG.2998.16	ENSG00000004139	3.72x10⁻⁴	-	SARM1	GO:0005737//cytoplasm;GO:0005739//mitochondrion;GO:0005829//cytosol;GO:0005874//microtubule;GO:0015630//microtubule cytoskeleton;GO:0030054//cell junction;GO:0030424//axon;GO:0030425//dendrite;GO:0031315//extrinsic component of mitochondrial outer membrane;GO:0042995//cell projection;GO:0045202//synapse	GO:0003953//NAD+ nucleosidase activity;GO:0005515//protein binding;GO:0016787//hydrolase activity;GO:0016798//hydrolase activity, acting on glycosyl bonds;GO:0035591//signaling adaptor activity;GO:0042802//identical protein binding;GO:0050135//NAD(P)+ nucleosidase activity;GO:0061809//NAD+ nucleotidase, cyclic ADP-ribose generating	GO:0002376//immune system process;GO:0006796//phosphate-containing compound metabolic process;GO:0007165//signal transduction;GO:0007399//nervous system development;GO:0009749//response to glucose;GO:0019677//NAD catabolic process;GO:0030154//cell differentiation;GO:0034128//negative regulation of MyD88-independent toll-like receptor signaling pathway;GO:0042981//regulation of apoptotic process;G…
MSTRG.3874.7	ENSG00000004139	2.21x10⁻³	-	SARM1	GO:0005737//cytoplasm;GO:0005739//mitochondrion;GO:0005829//cytosol;GO:0005874//microtubule;GO:0015630//microtubule cytoskeleton;GO:0030054//cell junction;GO:0030424//axon;GO:0030425//dendrite;GO:0031315//extrinsic component of mitochondrial outer membrane;GO:0042995//cell projection;GO:0045202//synapse	GO:0003953//NAD+ nucleosidase activity;GO:0005515//protein binding;GO:0016787//hydrolase activity;GO:0016798//hydrolase activity, acting on glycosyl bonds;GO:0035591//signaling adaptor activity;GO:0042802//identical protein binding;GO:0050135//NAD(P)+ nucleosidase activity;GO:0061809//NAD+ nucleotidase, cyclic ADP-ribose generating	GO:0002376//immune system process;GO:0006796//phosphate-containing compound metabolic process;GO:0007165//signal transduction;GO:0007399//nervous system development;GO:0009749//response to glucose;GO:0019677//NAD catabolic process;GO:0030154//cell differentiation;GO:0034128//negative regulation of MyD88-independent toll-like receptor signaling pathway;GO:0042981//regulation of apoptotic process;G…
MSTRG.5513.1	ENSG00000004139	9.37x10⁻⁵	-	SARM1	GO:0005737//cytoplasm;GO:0005739//mitochondrion;GO:0005829//cytosol;GO:0005874//microtubule;GO:0015630//microtubule cytoskeleton;GO:0030054//cell junction;GO:0030424//axon;GO:0030425//dendrite;GO:0031315//extrinsic component of mitochondrial outer membrane;GO:0042995//cell projection;GO:0045202//synapse	GO:0003953//NAD+ nucleosidase activity;GO:0005515//protein binding;GO:0016787//hydrolase activity;GO:0016798//hydrolase activity, acting on glycosyl bonds;GO:0035591//signaling adaptor activity;GO:0042802//identical protein binding;GO:0050135//NAD(P)+ nucleosidase activity;GO:0061809//NAD+ nucleotidase, cyclic ADP-ribose generating	GO:0002376//immune system process;GO:0006796//phosphate-containing compound metabolic process;GO:0007165//signal transduction;GO:0007399//nervous system development;GO:0009749//response to glucose;GO:0019677//NAD catabolic process;GO:0030154//cell differentiation;GO:0034128//negative regulation of MyD88-independent toll-like receptor signaling pathway;GO:0042981//regulation of apoptotic process;G…
MSTRG.5762.1	ENSG00000004139	7.92x10⁻⁴	-	SARM1	GO:0005737//cytoplasm;GO:0005739//mitochondrion;GO:0005829//cytosol;GO:0005874//microtubule;GO:0015630//microtubule cytoskeleton;GO:0030054//cell junction;GO:0030424//axon;GO:0030425//dendrite;GO:0031315//extrinsic component of mitochondrial outer membrane;GO:0042995//cell projection;GO:0045202//synapse	GO:0003953//NAD+ nucleosidase activity;GO:0005515//protein binding;GO:0016787//hydrolase activity;GO:0016798//hydrolase activity, acting on glycosyl bonds;GO:0035591//signaling adaptor activity;GO:0042802//identical protein binding;GO:0050135//NAD(P)+ nucleosidase activity;GO:0061809//NAD+ nucleotidase, cyclic ADP-ribose generating	GO:0002376//immune system process;GO:0006796//phosphate-containing compound metabolic process;GO:0007165//signal transduction;GO:0007399//nervous system development;GO:0009749//response to glucose;GO:0019677//NAD catabolic process;GO:0030154//cell differentiation;GO:0034128//negative regulation of MyD88-independent toll-like receptor signaling pathway;GO:0042981//regulation of apoptotic process;G…
MSTRG.6030.4	ENSG00000004139	2.78x10⁻³	-	SARM1	GO:0005737//cytoplasm;GO:0005739//mitochondrion;GO:0005829//cytosol;GO:0005874//microtubule;GO:0015630//microtubule cytoskeleton;GO:0030054//cell junction;GO:0030424//axon;GO:0030425//dendrite;GO:0031315//extrinsic component of mitochondrial outer membrane;GO:0042995//cell projection;GO:0045202//synapse	GO:0003953//NAD+ nucleosidase activity;GO:0005515//protein binding;GO:0016787//hydrolase activity;GO:0016798//hydrolase activity, acting on glycosyl bonds;GO:0035591//signaling adaptor activity;GO:0042802//identical protein binding;GO:0050135//NAD(P)+ nucleosidase activity;GO:0061809//NAD+ nucleotidase, cyclic ADP-ribose generating	GO:0002376//immune system process;GO:0006796//phosphate-containing compound metabolic process;GO:0007165//signal transduction;GO:0007399//nervous system development;GO:0009749//response to glucose;GO:0019677//NAD catabolic process;GO:0030154//cell differentiation;GO:0034128//negative regulation of MyD88-independent toll-like receptor signaling pathway;GO:0042981//regulation of apoptotic process;G…
MSTRG.8942.1	ENSG00000004139	8.85x10⁻⁵	-	SARM1	GO:0005737//cytoplasm;GO:0005739//mitochondrion;GO:0005829//cytosol;GO:0005874//microtubule;GO:0015630//microtubule cytoskeleton;GO:0030054//cell junction;GO:0030424//axon;GO:0030425//dendrite;GO:0031315//extrinsic component of mitochondrial outer membrane;GO:0042995//cell projection;GO:0045202//synapse	GO:0003953//NAD+ nucleosidase activity;GO:0005515//protein binding;GO:0016787//hydrolase activity;GO:0016798//hydrolase activity, acting on glycosyl bonds;GO:0035591//signaling adaptor activity;GO:0042802//identical protein binding;GO:0050135//NAD(P)+ nucleosidase activity;GO:0061809//NAD+ nucleotidase, cyclic ADP-ribose generating	GO:0002376//immune system process;GO:0006796//phosphate-containing compound metabolic process;GO:0007165//signal transduction;GO:0007399//nervous system development;GO:0009749//response to glucose;GO:0019677//NAD catabolic process;GO:0030154//cell differentiation;GO:0034128//negative regulation of MyD88-independent toll-like receptor signaling pathway;GO:0042981//regulation of apoptotic process;G…
MSTRG.8942.2	ENSG00000004139	3.52x10⁻⁴	-	SARM1	GO:0005737//cytoplasm;GO:0005739//mitochondrion;GO:0005829//cytosol;GO:0005874//microtubule;GO:0015630//microtubule cytoskeleton;GO:0030054//cell junction;GO:0030424//axon;GO:0030425//dendrite;GO:0031315//extrinsic component of mitochondrial outer membrane;GO:0042995//cell projection;GO:0045202//synapse	GO:0003953//NAD+ nucleosidase activity;GO:0005515//protein binding;GO:0016787//hydrolase activity;GO:0016798//hydrolase activity, acting on glycosyl bonds;GO:0035591//signaling adaptor activity;GO:0042802//identical protein binding;GO:0050135//NAD(P)+ nucleosidase activity;GO:0061809//NAD+ nucleotidase, cyclic ADP-ribose generating	GO:0002376//immune system process;GO:0006796//phosphate-containing compound metabolic process;GO:0007165//signal transduction;GO:0007399//nervous system development;GO:0009749//response to glucose;GO:0019677//NAD catabolic process;GO:0030154//cell differentiation;GO:0034128//negative regulation of MyD88-independent toll-like receptor signaling pathway;GO:0042981//regulation of apoptotic process;G…
MSTRG.8942.3	ENSG00000004139	5.72x10⁻⁴	-	SARM1	GO:0005737//cytoplasm;GO:0005739//mitochondrion;GO:0005829//cytosol;GO:0005874//microtubule;GO:0015630//microtubule cytoskeleton;GO:0030054//cell junction;GO:0030424//axon;GO:0030425//dendrite;GO:0031315//extrinsic component of mitochondrial outer membrane;GO:0042995//cell projection;GO:0045202//synapse	GO:0003953//NAD+ nucleosidase activity;GO:0005515//protein binding;GO:0016787//hydrolase activity;GO:0016798//hydrolase activity, acting on glycosyl bonds;GO:0035591//signaling adaptor activity;GO:0042802//identical protein binding;GO:0050135//NAD(P)+ nucleosidase activity;GO:0061809//NAD+ nucleotidase, cyclic ADP-ribose generating	GO:0002376//immune system process;GO:0006796//phosphate-containing compound metabolic process;GO:0007165//signal transduction;GO:0007399//nervous system development;GO:0009749//response to glucose;GO:0019677//NAD catabolic process;GO:0030154//cell differentiation;GO:0034128//negative regulation of MyD88-independent toll-like receptor signaling pathway;GO:0042981//regulation of apoptotic process;G…
MSTRG.9677.1	ENSG00000004139	1.14x10⁻⁵	-	SARM1	GO:0005737//cytoplasm;GO:0005739//mitochondrion;GO:0005829//cytosol;GO:0005874//microtubule;GO:0015630//microtubule cytoskeleton;GO:0030054//cell junction;GO:0030424//axon;GO:0030425//dendrite;GO:0031315//extrinsic component of mitochondrial outer membrane;GO:0042995//cell projection;GO:0045202//synapse	GO:0003953//NAD+ nucleosidase activity;GO:0005515//protein binding;GO:0016787//hydrolase activity;GO:0016798//hydrolase activity, acting on glycosyl bonds;GO:0035591//signaling adaptor activity;GO:0042802//identical protein binding;GO:0050135//NAD(P)+ nucleosidase activity;GO:0061809//NAD+ nucleotidase, cyclic ADP-ribose generating	GO:0002376//immune system process;GO:0006796//phosphate-containing compound metabolic process;GO:0007165//signal transduction;GO:0007399//nervous system development;GO:0009749//response to glucose;GO:0019677//NAD catabolic process;GO:0030154//cell differentiation;GO:0034128//negative regulation of MyD88-independent toll-like receptor signaling pathway;GO:0042981//regulation of apoptotic process;G…
ENST00000343528	ENSG00000004399	3.38x10⁻⁴	PDXK-203	PLXND1	GO:0002116//semaphorin receptor complex;GO:0005886//plasma membrane;GO:0005887//integral component of plasma membrane;GO:0016020//membrane;GO:0016021//integral component of membrane;GO:0030027//lamellipodium;GO:0031258//lamellipodium membrane;GO:0042995//cell projection	GO:0005515//protein binding;GO:0017154//semaphorin receptor activity;GO:0019904//protein domain specific binding	GO:0001525//angiogenesis;GO:0001569//branching involved in blood vessel morphogenesis;GO:0001822//kidney development;GO:0003151//outflow tract morphogenesis;GO:0003279//cardiac septum development;GO:0007162//negative regulation of cell adhesion;GO:0007165//signal transduction;GO:0007416//synapse assembly;GO:0008360//regulation of cell shape;GO:0030334//regulation of cell migration;GO:0032092//pos…
ENST00000379053	ENSG00000004399	2.51x10⁻³	LINC00654-201	PLXND1	GO:0002116//semaphorin receptor complex;GO:0005886//plasma membrane;GO:0005887//integral component of plasma membrane;GO:0016020//membrane;GO:0016021//integral component of membrane;GO:0030027//lamellipodium;GO:0031258//lamellipodium membrane;GO:0042995//cell projection	GO:0005515//protein binding;GO:0017154//semaphorin receptor activity;GO:0019904//protein domain specific binding	GO:0001525//angiogenesis;GO:0001569//branching involved in blood vessel morphogenesis;GO:0001822//kidney development;GO:0003151//outflow tract morphogenesis;GO:0003279//cardiac septum development;GO:0007162//negative regulation of cell adhesion;GO:0007165//signal transduction;GO:0007416//synapse assembly;GO:0008360//regulation of cell shape;GO:0030334//regulation of cell migration;GO:0032092//pos…
ENST00000391874	ENSG00000004399	1.55x10⁻³	ENAH-205	PLXND1	GO:0002116//semaphorin receptor complex;GO:0005886//plasma membrane;GO:0005887//integral component of plasma membrane;GO:0016020//membrane;GO:0016021//integral component of membrane;GO:0030027//lamellipodium;GO:0031258//lamellipodium membrane;GO:0042995//cell projection	GO:0005515//protein binding;GO:0017154//semaphorin receptor activity;GO:0019904//protein domain specific binding	GO:0001525//angiogenesis;GO:0001569//branching involved in blood vessel morphogenesis;GO:0001822//kidney development;GO:0003151//outflow tract morphogenesis;GO:0003279//cardiac septum development;GO:0007162//negative regulation of cell adhesion;GO:0007165//signal transduction;GO:0007416//synapse assembly;GO:0008360//regulation of cell shape;GO:0030334//regulation of cell migration;GO:0032092//pos…
ENST00000417025	ENSG00000004399	2.05x10⁻³	QARS1-203	PLXND1	GO:0002116//semaphorin receptor complex;GO:0005886//plasma membrane;GO:0005887//integral component of plasma membrane;GO:0016020//membrane;GO:0016021//integral component of membrane;GO:0030027//lamellipodium;GO:0031258//lamellipodium membrane;GO:0042995//cell projection	GO:0005515//protein binding;GO:0017154//semaphorin receptor activity;GO:0019904//protein domain specific binding	GO:0001525//angiogenesis;GO:0001569//branching involved in blood vessel morphogenesis;GO:0001822//kidney development;GO:0003151//outflow tract morphogenesis;GO:0003279//cardiac septum development;GO:0007162//negative regulation of cell adhesion;GO:0007165//signal transduction;GO:0007416//synapse assembly;GO:0008360//regulation of cell shape;GO:0030334//regulation of cell migration;GO:0032092//pos…
ENST00000455909	ENSG00000004399	1.52x10⁻⁶	FKBP9P1-202	PLXND1	GO:0002116//semaphorin receptor complex;GO:0005886//plasma membrane;GO:0005887//integral component of plasma membrane;GO:0016020//membrane;GO:0016021//integral component of membrane;GO:0030027//lamellipodium;GO:0031258//lamellipodium membrane;GO:0042995//cell projection	GO:0005515//protein binding;GO:0017154//semaphorin receptor activity;GO:0019904//protein domain specific binding	GO:0001525//angiogenesis;GO:0001569//branching involved in blood vessel morphogenesis;GO:0001822//kidney development;GO:0003151//outflow tract morphogenesis;GO:0003279//cardiac septum development;GO:0007162//negative regulation of cell adhesion;GO:0007165//signal transduction;GO:0007416//synapse assembly;GO:0008360//regulation of cell shape;GO:0030334//regulation of cell migration;GO:0032092//pos…
ENST00000464481	ENSG00000004399	1.20x10⁻³	SPIRE1-208	PLXND1	GO:0002116//semaphorin receptor complex;GO:0005886//plasma membrane;GO:0005887//integral component of plasma membrane;GO:0016020//membrane;GO:0016021//integral component of membrane;GO:0030027//lamellipodium;GO:0031258//lamellipodium membrane;GO:0042995//cell projection	GO:0005515//protein binding;GO:0017154//semaphorin receptor activity;GO:0019904//protein domain specific binding	GO:0001525//angiogenesis;GO:0001569//branching involved in blood vessel morphogenesis;GO:0001822//kidney development;GO:0003151//outflow tract morphogenesis;GO:0003279//cardiac septum development;GO:0007162//negative regulation of cell adhesion;GO:0007165//signal transduction;GO:0007416//synapse assembly;GO:0008360//regulation of cell shape;GO:0030334//regulation of cell migration;GO:0032092//pos…
ENST00000466496	ENSG00000004399	1.37x10⁻³	MTMR11-203	PLXND1	GO:0002116//semaphorin receptor complex;GO:0005886//plasma membrane;GO:0005887//integral component of plasma membrane;GO:0016020//membrane;GO:0016021//integral component of membrane;GO:0030027//lamellipodium;GO:0031258//lamellipodium membrane;GO:0042995//cell projection	GO:0005515//protein binding;GO:0017154//semaphorin receptor activity;GO:0019904//protein domain specific binding	GO:0001525//angiogenesis;GO:0001569//branching involved in blood vessel morphogenesis;GO:0001822//kidney development;GO:0003151//outflow tract morphogenesis;GO:0003279//cardiac septum development;GO:0007162//negative regulation of cell adhesion;GO:0007165//signal transduction;GO:0007416//synapse assembly;GO:0008360//regulation of cell shape;GO:0030334//regulation of cell migration;GO:0032092//pos…
ENST00000470581	ENSG00000004399	2.16x10⁻³	SEMA3C-207	PLXND1	GO:0002116//semaphorin receptor complex;GO:0005886//plasma membrane;GO:0005887//integral component of plasma membrane;GO:0016020//membrane;GO:0016021//integral component of membrane;GO:0030027//lamellipodium;GO:0031258//lamellipodium membrane;GO:0042995//cell projection	GO:0005515//protein binding;GO:0017154//semaphorin receptor activity;GO:0019904//protein domain specific binding	GO:0001525//angiogenesis;GO:0001569//branching involved in blood vessel morphogenesis;GO:0001822//kidney development;GO:0003151//outflow tract morphogenesis;GO:0003279//cardiac septum development;GO:0007162//negative regulation of cell adhesion;GO:0007165//signal transduction;GO:0007416//synapse assembly;GO:0008360//regulation of cell shape;GO:0030334//regulation of cell migration;GO:0032092//pos…
ENST00000473778	ENSG00000004399	3.09x10⁻⁴	AOPEP-213	PLXND1	GO:0002116//semaphorin receptor complex;GO:0005886//plasma membrane;GO:0005887//integral component of plasma membrane;GO:0016020//membrane;GO:0016021//integral component of membrane;GO:0030027//lamellipodium;GO:0031258//lamellipodium membrane;GO:0042995//cell projection	GO:0005515//protein binding;GO:0017154//semaphorin receptor activity;GO:0019904//protein domain specific binding	GO:0001525//angiogenesis;GO:0001569//branching involved in blood vessel morphogenesis;GO:0001822//kidney development;GO:0003151//outflow tract morphogenesis;GO:0003279//cardiac septum development;GO:0007162//negative regulation of cell adhesion;GO:0007165//signal transduction;GO:0007416//synapse assembly;GO:0008360//regulation of cell shape;GO:0030334//regulation of cell migration;GO:0032092//pos…
ENST00000475181	ENSG00000004399	1.90x10⁻⁴	CCDC80-206	PLXND1	GO:0002116//semaphorin receptor complex;GO:0005886//plasma membrane;GO:0005887//integral component of plasma membrane;GO:0016020//membrane;GO:0016021//integral component of membrane;GO:0030027//lamellipodium;GO:0031258//lamellipodium membrane;GO:0042995//cell projection	GO:0005515//protein binding;GO:0017154//semaphorin receptor activity;GO:0019904//protein domain specific binding	GO:0001525//angiogenesis;GO:0001569//branching involved in blood vessel morphogenesis;GO:0001822//kidney development;GO:0003151//outflow tract morphogenesis;GO:0003279//cardiac septum development;GO:0007162//negative regulation of cell adhesion;GO:0007165//signal transduction;GO:0007416//synapse assembly;GO:0008360//regulation of cell shape;GO:0030334//regulation of cell migration;GO:0032092//pos…
ENST00000477661	ENSG00000004399	9.53x10⁻⁴	AKR1C1-205	PLXND1	GO:0002116//semaphorin receptor complex;GO:0005886//plasma membrane;GO:0005887//integral component of plasma membrane;GO:0016020//membrane;GO:0016021//integral component of membrane;GO:0030027//lamellipodium;GO:0031258//lamellipodium membrane;GO:0042995//cell projection	GO:0005515//protein binding;GO:0017154//semaphorin receptor activity;GO:0019904//protein domain specific binding	GO:0001525//angiogenesis;GO:0001569//branching involved in blood vessel morphogenesis;GO:0001822//kidney development;GO:0003151//outflow tract morphogenesis;GO:0003279//cardiac septum development;GO:0007162//negative regulation of cell adhesion;GO:0007165//signal transduction;GO:0007416//synapse assembly;GO:0008360//regulation of cell shape;GO:0030334//regulation of cell migration;GO:0032092//pos…
ENST00000478845	ENSG00000004399	2.55x10⁻³	THBS1-IT1-201	PLXND1	GO:0002116//semaphorin receptor complex;GO:0005886//plasma membrane;GO:0005887//integral component of plasma membrane;GO:0016020//membrane;GO:0016021//integral component of membrane;GO:0030027//lamellipodium;GO:0031258//lamellipodium membrane;GO:0042995//cell projection	GO:0005515//protein binding;GO:0017154//semaphorin receptor activity;GO:0019904//protein domain specific binding	GO:0001525//angiogenesis;GO:0001569//branching involved in blood vessel morphogenesis;GO:0001822//kidney development;GO:0003151//outflow tract morphogenesis;GO:0003279//cardiac septum development;GO:0007162//negative regulation of cell adhesion;GO:0007165//signal transduction;GO:0007416//synapse assembly;GO:0008360//regulation of cell shape;GO:0030334//regulation of cell migration;GO:0032092//pos…
ENST00000479053	ENSG00000004399	2.15x10⁻⁴	RECK-203	PLXND1	GO:0002116//semaphorin receptor complex;GO:0005886//plasma membrane;GO:0005887//integral component of plasma membrane;GO:0016020//membrane;GO:0016021//integral component of membrane;GO:0030027//lamellipodium;GO:0031258//lamellipodium membrane;GO:0042995//cell projection	GO:0005515//protein binding;GO:0017154//semaphorin receptor activity;GO:0019904//protein domain specific binding	GO:0001525//angiogenesis;GO:0001569//branching involved in blood vessel morphogenesis;GO:0001822//kidney development;GO:0003151//outflow tract morphogenesis;GO:0003279//cardiac septum development;GO:0007162//negative regulation of cell adhesion;GO:0007165//signal transduction;GO:0007416//synapse assembly;GO:0008360//regulation of cell shape;GO:0030334//regulation of cell migration;GO:0032092//pos…
ENST00000480992	ENSG00000004399	2.61x10⁻³	NOP56-213	PLXND1	GO:0002116//semaphorin receptor complex;GO:0005886//plasma membrane;GO:0005887//integral component of plasma membrane;GO:0016020//membrane;GO:0016021//integral component of membrane;GO:0030027//lamellipodium;GO:0031258//lamellipodium membrane;GO:0042995//cell projection	GO:0005515//protein binding;GO:0017154//semaphorin receptor activity;GO:0019904//protein domain specific binding	GO:0001525//angiogenesis;GO:0001569//branching involved in blood vessel morphogenesis;GO:0001822//kidney development;GO:0003151//outflow tract morphogenesis;GO:0003279//cardiac septum development;GO:0007162//negative regulation of cell adhesion;GO:0007165//signal transduction;GO:0007416//synapse assembly;GO:0008360//regulation of cell shape;GO:0030334//regulation of cell migration;GO:0032092//pos…
ENST00000481527	ENSG00000004399	2.62x10⁻³	ACOX2-211	PLXND1	GO:0002116//semaphorin receptor complex;GO:0005886//plasma membrane;GO:0005887//integral component of plasma membrane;GO:0016020//membrane;GO:0016021//integral component of membrane;GO:0030027//lamellipodium;GO:0031258//lamellipodium membrane;GO:0042995//cell projection	GO:0005515//protein binding;GO:0017154//semaphorin receptor activity;GO:0019904//protein domain specific binding	GO:0001525//angiogenesis;GO:0001569//branching involved in blood vessel morphogenesis;GO:0001822//kidney development;GO:0003151//outflow tract morphogenesis;GO:0003279//cardiac septum development;GO:0007162//negative regulation of cell adhesion;GO:0007165//signal transduction;GO:0007416//synapse assembly;GO:0008360//regulation of cell shape;GO:0030334//regulation of cell migration;GO:0032092//pos…
ENST00000482337	ENSG00000004399	1.44x10⁻⁴	KHDC4-208	PLXND1	GO:0002116//semaphorin receptor complex;GO:0005886//plasma membrane;GO:0005887//integral component of plasma membrane;GO:0016020//membrane;GO:0016021//integral component of membrane;GO:0030027//lamellipodium;GO:0031258//lamellipodium membrane;GO:0042995//cell projection	GO:0005515//protein binding;GO:0017154//semaphorin receptor activity;GO:0019904//protein domain specific binding	GO:0001525//angiogenesis;GO:0001569//branching involved in blood vessel morphogenesis;GO:0001822//kidney development;GO:0003151//outflow tract morphogenesis;GO:0003279//cardiac septum development;GO:0007162//negative regulation of cell adhesion;GO:0007165//signal transduction;GO:0007416//synapse assembly;GO:0008360//regulation of cell shape;GO:0030334//regulation of cell migration;GO:0032092//pos…
ENST00000485483	ENSG00000004399	4.43x10⁻⁴	MAGED2-209	PLXND1	GO:0002116//semaphorin receptor complex;GO:0005886//plasma membrane;GO:0005887//integral component of plasma membrane;GO:0016020//membrane;GO:0016021//integral component of membrane;GO:0030027//lamellipodium;GO:0031258//lamellipodium membrane;GO:0042995//cell projection	GO:0005515//protein binding;GO:0017154//semaphorin receptor activity;GO:0019904//protein domain specific binding	GO:0001525//angiogenesis;GO:0001569//branching involved in blood vessel morphogenesis;GO:0001822//kidney development;GO:0003151//outflow tract morphogenesis;GO:0003279//cardiac septum development;GO:0007162//negative regulation of cell adhesion;GO:0007165//signal transduction;GO:0007416//synapse assembly;GO:0008360//regulation of cell shape;GO:0030334//regulation of cell migration;GO:0032092//pos…
ENST00000487278	ENSG00000004399	1.35x10⁻³	ZSWIM8-210	PLXND1	GO:0002116//semaphorin receptor complex;GO:0005886//plasma membrane;GO:0005887//integral component of plasma membrane;GO:0016020//membrane;GO:0016021//integral component of membrane;GO:0030027//lamellipodium;GO:0031258//lamellipodium membrane;GO:0042995//cell projection	GO:0005515//protein binding;GO:0017154//semaphorin receptor activity;GO:0019904//protein domain specific binding	GO:0001525//angiogenesis;GO:0001569//branching involved in blood vessel morphogenesis;GO:0001822//kidney development;GO:0003151//outflow tract morphogenesis;GO:0003279//cardiac septum development;GO:0007162//negative regulation of cell adhesion;GO:0007165//signal transduction;GO:0007416//synapse assembly;GO:0008360//regulation of cell shape;GO:0030334//regulation of cell migration;GO:0032092//pos…
ENST00000492135	ENSG00000004399	1.08x10⁻³	NOP56-216	PLXND1	GO:0002116//semaphorin receptor complex;GO:0005886//plasma membrane;GO:0005887//integral component of plasma membrane;GO:0016020//membrane;GO:0016021//integral component of membrane;GO:0030027//lamellipodium;GO:0031258//lamellipodium membrane;GO:0042995//cell projection	GO:0005515//protein binding;GO:0017154//semaphorin receptor activity;GO:0019904//protein domain specific binding	GO:0001525//angiogenesis;GO:0001569//branching involved in blood vessel morphogenesis;GO:0001822//kidney development;GO:0003151//outflow tract morphogenesis;GO:0003279//cardiac septum development;GO:0007162//negative regulation of cell adhesion;GO:0007165//signal transduction;GO:0007416//synapse assembly;GO:0008360//regulation of cell shape;GO:0030334//regulation of cell migration;GO:0032092//pos…
ENST00000493523	ENSG00000004399	3.42x10⁻³	RAB11FIP5-206	PLXND1	GO:0002116//semaphorin receptor complex;GO:0005886//plasma membrane;GO:0005887//integral component of plasma membrane;GO:0016020//membrane;GO:0016021//integral component of membrane;GO:0030027//lamellipodium;GO:0031258//lamellipodium membrane;GO:0042995//cell projection	GO:0005515//protein binding;GO:0017154//semaphorin receptor activity;GO:0019904//protein domain specific binding	GO:0001525//angiogenesis;GO:0001569//branching involved in blood vessel morphogenesis;GO:0001822//kidney development;GO:0003151//outflow tract morphogenesis;GO:0003279//cardiac septum development;GO:0007162//negative regulation of cell adhesion;GO:0007165//signal transduction;GO:0007416//synapse assembly;GO:0008360//regulation of cell shape;GO:0030334//regulation of cell migration;GO:0032092//pos…
ENST00000495714	ENSG00000004399	1.97x10⁻³	ANLN-213	PLXND1	GO:0002116//semaphorin receptor complex;GO:0005886//plasma membrane;GO:0005887//integral component of plasma membrane;GO:0016020//membrane;GO:0016021//integral component of membrane;GO:0030027//lamellipodium;GO:0031258//lamellipodium membrane;GO:0042995//cell projection	GO:0005515//protein binding;GO:0017154//semaphorin receptor activity;GO:0019904//protein domain specific binding	GO:0001525//angiogenesis;GO:0001569//branching involved in blood vessel morphogenesis;GO:0001822//kidney development;GO:0003151//outflow tract morphogenesis;GO:0003279//cardiac septum development;GO:0007162//negative regulation of cell adhesion;GO:0007165//signal transduction;GO:0007416//synapse assembly;GO:0008360//regulation of cell shape;GO:0030334//regulation of cell migration;GO:0032092//pos…
ENST00000495841	ENSG00000004399	1.60x10⁻⁴	CAV2-214	PLXND1	GO:0002116//semaphorin receptor complex;GO:0005886//plasma membrane;GO:0005887//integral component of plasma membrane;GO:0016020//membrane;GO:0016021//integral component of membrane;GO:0030027//lamellipodium;GO:0031258//lamellipodium membrane;GO:0042995//cell projection	GO:0005515//protein binding;GO:0017154//semaphorin receptor activity;GO:0019904//protein domain specific binding	GO:0001525//angiogenesis;GO:0001569//branching involved in blood vessel morphogenesis;GO:0001822//kidney development;GO:0003151//outflow tract morphogenesis;GO:0003279//cardiac septum development;GO:0007162//negative regulation of cell adhesion;GO:0007165//signal transduction;GO:0007416//synapse assembly;GO:0008360//regulation of cell shape;GO:0030334//regulation of cell migration;GO:0032092//pos…
ENST00000496775	ENSG00000004399	6.15x10⁻⁴	NOP56-218	PLXND1	GO:0002116//semaphorin receptor complex;GO:0005886//plasma membrane;GO:0005887//integral component of plasma membrane;GO:0016020//membrane;GO:0016021//integral component of membrane;GO:0030027//lamellipodium;GO:0031258//lamellipodium membrane;GO:0042995//cell projection	GO:0005515//protein binding;GO:0017154//semaphorin receptor activity;GO:0019904//protein domain specific binding	GO:0001525//angiogenesis;GO:0001569//branching involved in blood vessel morphogenesis;GO:0001822//kidney development;GO:0003151//outflow tract morphogenesis;GO:0003279//cardiac septum development;GO:0007162//negative regulation of cell adhesion;GO:0007165//signal transduction;GO:0007416//synapse assembly;GO:0008360//regulation of cell shape;GO:0030334//regulation of cell migration;GO:0032092//pos…
ENST00000496857	ENSG00000004399	2.73x10⁻³	EHBP1-220	PLXND1	GO:0002116//semaphorin receptor complex;GO:0005886//plasma membrane;GO:0005887//integral component of plasma membrane;GO:0016020//membrane;GO:0016021//integral component of membrane;GO:0030027//lamellipodium;GO:0031258//lamellipodium membrane;GO:0042995//cell projection	GO:0005515//protein binding;GO:0017154//semaphorin receptor activity;GO:0019904//protein domain specific binding	GO:0001525//angiogenesis;GO:0001569//branching involved in blood vessel morphogenesis;GO:0001822//kidney development;GO:0003151//outflow tract morphogenesis;GO:0003279//cardiac septum development;GO:0007162//negative regulation of cell adhesion;GO:0007165//signal transduction;GO:0007416//synapse assembly;GO:0008360//regulation of cell shape;GO:0030334//regulation of cell migration;GO:0032092//pos…
ENST00000497322	ENSG00000004399	6.59x10⁻⁴	RPL12-203	PLXND1	GO:0002116//semaphorin receptor complex;GO:0005886//plasma membrane;GO:0005887//integral component of plasma membrane;GO:0016020//membrane;GO:0016021//integral component of membrane;GO:0030027//lamellipodium;GO:0031258//lamellipodium membrane;GO:0042995//cell projection	GO:0005515//protein binding;GO:0017154//semaphorin receptor activity;GO:0019904//protein domain specific binding	GO:0001525//angiogenesis;GO:0001569//branching involved in blood vessel morphogenesis;GO:0001822//kidney development;GO:0003151//outflow tract morphogenesis;GO:0003279//cardiac septum development;GO:0007162//negative regulation of cell adhesion;GO:0007165//signal transduction;GO:0007416//synapse assembly;GO:0008360//regulation of cell shape;GO:0030334//regulation of cell migration;GO:0032092//pos…
ENST00000500112	ENSG00000004399	3.00x10⁻³	CASC19-201	PLXND1	GO:0002116//semaphorin receptor complex;GO:0005886//plasma membrane;GO:0005887//integral component of plasma membrane;GO:0016020//membrane;GO:0016021//integral component of membrane;GO:0030027//lamellipodium;GO:0031258//lamellipodium membrane;GO:0042995//cell projection	GO:0005515//protein binding;GO:0017154//semaphorin receptor activity;GO:0019904//protein domain specific binding	GO:0001525//angiogenesis;GO:0001569//branching involved in blood vessel morphogenesis;GO:0001822//kidney development;GO:0003151//outflow tract morphogenesis;GO:0003279//cardiac septum development;GO:0007162//negative regulation of cell adhesion;GO:0007165//signal transduction;GO:0007416//synapse assembly;GO:0008360//regulation of cell shape;GO:0030334//regulation of cell migration;GO:0032092//pos…
ENST00000504263	ENSG00000004399	3.52x10⁻³	PCAT4-201	PLXND1	GO:0002116//semaphorin receptor complex;GO:0005886//plasma membrane;GO:0005887//integral component of plasma membrane;GO:0016020//membrane;GO:0016021//integral component of membrane;GO:0030027//lamellipodium;GO:0031258//lamellipodium membrane;GO:0042995//cell projection	GO:0005515//protein binding;GO:0017154//semaphorin receptor activity;GO:0019904//protein domain specific binding	GO:0001525//angiogenesis;GO:0001569//branching involved in blood vessel morphogenesis;GO:0001822//kidney development;GO:0003151//outflow tract morphogenesis;GO:0003279//cardiac septum development;GO:0007162//negative regulation of cell adhesion;GO:0007165//signal transduction;GO:0007416//synapse assembly;GO:0008360//regulation of cell shape;GO:0030334//regulation of cell migration;GO:0032092//pos…
ENST00000504739	ENSG00000004399	2.63x10⁻³	WDR1-207	PLXND1	GO:0002116//semaphorin receptor complex;GO:0005886//plasma membrane;GO:0005887//integral component of plasma membrane;GO:0016020//membrane;GO:0016021//integral component of membrane;GO:0030027//lamellipodium;GO:0031258//lamellipodium membrane;GO:0042995//cell projection	GO:0005515//protein binding;GO:0017154//semaphorin receptor activity;GO:0019904//protein domain specific binding	GO:0001525//angiogenesis;GO:0001569//branching involved in blood vessel morphogenesis;GO:0001822//kidney development;GO:0003151//outflow tract morphogenesis;GO:0003279//cardiac septum development;GO:0007162//negative regulation of cell adhesion;GO:0007165//signal transduction;GO:0007416//synapse assembly;GO:0008360//regulation of cell shape;GO:0030334//regulation of cell migration;GO:0032092//pos…
ENST00000505851	ENSG00000004399	1.73x10⁻³	WDR1-209	PLXND1	GO:0002116//semaphorin receptor complex;GO:0005886//plasma membrane;GO:0005887//integral component of plasma membrane;GO:0016020//membrane;GO:0016021//integral component of membrane;GO:0030027//lamellipodium;GO:0031258//lamellipodium membrane;GO:0042995//cell projection	GO:0005515//protein binding;GO:0017154//semaphorin receptor activity;GO:0019904//protein domain specific binding	GO:0001525//angiogenesis;GO:0001569//branching involved in blood vessel morphogenesis;GO:0001822//kidney development;GO:0003151//outflow tract morphogenesis;GO:0003279//cardiac septum development;GO:0007162//negative regulation of cell adhesion;GO:0007165//signal transduction;GO:0007416//synapse assembly;GO:0008360//regulation of cell shape;GO:0030334//regulation of cell migration;GO:0032092//pos…
ENST00000519571	ENSG00000004399	6.12x10⁻⁶	GALNT10-207	PLXND1	GO:0002116//semaphorin receptor complex;GO:0005886//plasma membrane;GO:0005887//integral component of plasma membrane;GO:0016020//membrane;GO:0016021//integral component of membrane;GO:0030027//lamellipodium;GO:0031258//lamellipodium membrane;GO:0042995//cell projection	GO:0005515//protein binding;GO:0017154//semaphorin receptor activity;GO:0019904//protein domain specific binding	GO:0001525//angiogenesis;GO:0001569//branching involved in blood vessel morphogenesis;GO:0001822//kidney development;GO:0003151//outflow tract morphogenesis;GO:0003279//cardiac septum development;GO:0007162//negative regulation of cell adhesion;GO:0007165//signal transduction;GO:0007416//synapse assembly;GO:0008360//regulation of cell shape;GO:0030334//regulation of cell migration;GO:0032092//pos…
ENST00000525711	ENSG00000004399	1.06x10⁻³	UBASH3B-202	PLXND1	GO:0002116//semaphorin receptor complex;GO:0005886//plasma membrane;GO:0005887//integral component of plasma membrane;GO:0016020//membrane;GO:0016021//integral component of membrane;GO:0030027//lamellipodium;GO:0031258//lamellipodium membrane;GO:0042995//cell projection	GO:0005515//protein binding;GO:0017154//semaphorin receptor activity;GO:0019904//protein domain specific binding	GO:0001525//angiogenesis;GO:0001569//branching involved in blood vessel morphogenesis;GO:0001822//kidney development;GO:0003151//outflow tract morphogenesis;GO:0003279//cardiac septum development;GO:0007162//negative regulation of cell adhesion;GO:0007165//signal transduction;GO:0007416//synapse assembly;GO:0008360//regulation of cell shape;GO:0030334//regulation of cell migration;GO:0032092//pos…
ENST00000544307	ENSG00000004399	2.44x10⁻³	PDE3A-203	PLXND1	GO:0002116//semaphorin receptor complex;GO:0005886//plasma membrane;GO:0005887//integral component of plasma membrane;GO:0016020//membrane;GO:0016021//integral component of membrane;GO:0030027//lamellipodium;GO:0031258//lamellipodium membrane;GO:0042995//cell projection	GO:0005515//protein binding;GO:0017154//semaphorin receptor activity;GO:0019904//protein domain specific binding	GO:0001525//angiogenesis;GO:0001569//branching involved in blood vessel morphogenesis;GO:0001822//kidney development;GO:0003151//outflow tract morphogenesis;GO:0003279//cardiac septum development;GO:0007162//negative regulation of cell adhesion;GO:0007165//signal transduction;GO:0007416//synapse assembly;GO:0008360//regulation of cell shape;GO:0030334//regulation of cell migration;GO:0032092//pos…
ENST00000546642	ENSG00000004399	3.26x10⁻³	LUM-202	PLXND1	GO:0002116//semaphorin receptor complex;GO:0005886//plasma membrane;GO:0005887//integral component of plasma membrane;GO:0016020//membrane;GO:0016021//integral component of membrane;GO:0030027//lamellipodium;GO:0031258//lamellipodium membrane;GO:0042995//cell projection	GO:0005515//protein binding;GO:0017154//semaphorin receptor activity;GO:0019904//protein domain specific binding	GO:0001525//angiogenesis;GO:0001569//branching involved in blood vessel morphogenesis;GO:0001822//kidney development;GO:0003151//outflow tract morphogenesis;GO:0003279//cardiac septum development;GO:0007162//negative regulation of cell adhesion;GO:0007165//signal transduction;GO:0007416//synapse assembly;GO:0008360//regulation of cell shape;GO:0030334//regulation of cell migration;GO:0032092//pos…
ENST00000548071	ENSG00000004399	3.27x10⁻³	LUM-203	PLXND1	GO:0002116//semaphorin receptor complex;GO:0005886//plasma membrane;GO:0005887//integral component of plasma membrane;GO:0016020//membrane;GO:0016021//integral component of membrane;GO:0030027//lamellipodium;GO:0031258//lamellipodium membrane;GO:0042995//cell projection	GO:0005515//protein binding;GO:0017154//semaphorin receptor activity;GO:0019904//protein domain specific binding	GO:0001525//angiogenesis;GO:0001569//branching involved in blood vessel morphogenesis;GO:0001822//kidney development;GO:0003151//outflow tract morphogenesis;GO:0003279//cardiac septum development;GO:0007162//negative regulation of cell adhesion;GO:0007165//signal transduction;GO:0007416//synapse assembly;GO:0008360//regulation of cell shape;GO:0030334//regulation of cell migration;GO:0032092//pos…
ENST00000551988	ENSG00000004399	3.49x10⁻³	PAH-213	PLXND1	GO:0002116//semaphorin receptor complex;GO:0005886//plasma membrane;GO:0005887//integral component of plasma membrane;GO:0016020//membrane;GO:0016021//integral component of membrane;GO:0030027//lamellipodium;GO:0031258//lamellipodium membrane;GO:0042995//cell projection	GO:0005515//protein binding;GO:0017154//semaphorin receptor activity;GO:0019904//protein domain specific binding	GO:0001525//angiogenesis;GO:0001569//branching involved in blood vessel morphogenesis;GO:0001822//kidney development;GO:0003151//outflow tract morphogenesis;GO:0003279//cardiac septum development;GO:0007162//negative regulation of cell adhesion;GO:0007165//signal transduction;GO:0007416//synapse assembly;GO:0008360//regulation of cell shape;GO:0030334//regulation of cell migration;GO:0032092//pos…
ENST00000553596	ENSG00000004399	5.81x10⁻⁵	ARHGAP5-AS1-201	PLXND1	GO:0002116//semaphorin receptor complex;GO:0005886//plasma membrane;GO:0005887//integral component of plasma membrane;GO:0016020//membrane;GO:0016021//integral component of membrane;GO:0030027//lamellipodium;GO:0031258//lamellipodium membrane;GO:0042995//cell projection	GO:0005515//protein binding;GO:0017154//semaphorin receptor activity;GO:0019904//protein domain specific binding	GO:0001525//angiogenesis;GO:0001569//branching involved in blood vessel morphogenesis;GO:0001822//kidney development;GO:0003151//outflow tract morphogenesis;GO:0003279//cardiac septum development;GO:0007162//negative regulation of cell adhesion;GO:0007165//signal transduction;GO:0007416//synapse assembly;GO:0008360//regulation of cell shape;GO:0030334//regulation of cell migration;GO:0032092//pos…
ENST00000554295	ENSG00000004399	2.51x10⁻³	SLC9A7P1-201	PLXND1	GO:0002116//semaphorin receptor complex;GO:0005886//plasma membrane;GO:0005887//integral component of plasma membrane;GO:0016020//membrane;GO:0016021//integral component of membrane;GO:0030027//lamellipodium;GO:0031258//lamellipodium membrane;GO:0042995//cell projection	GO:0005515//protein binding;GO:0017154//semaphorin receptor activity;GO:0019904//protein domain specific binding	GO:0001525//angiogenesis;GO:0001569//branching involved in blood vessel morphogenesis;GO:0001822//kidney development;GO:0003151//outflow tract morphogenesis;GO:0003279//cardiac septum development;GO:0007162//negative regulation of cell adhesion;GO:0007165//signal transduction;GO:0007416//synapse assembly;GO:0008360//regulation of cell shape;GO:0030334//regulation of cell migration;GO:0032092//pos…
ENST00000577038	ENSG00000004399	1.93x10⁻³	MMD-203	PLXND1	GO:0002116//semaphorin receptor complex;GO:0005886//plasma membrane;GO:0005887//integral component of plasma membrane;GO:0016020//membrane;GO:0016021//integral component of membrane;GO:0030027//lamellipodium;GO:0031258//lamellipodium membrane;GO:0042995//cell projection	GO:0005515//protein binding;GO:0017154//semaphorin receptor activity;GO:0019904//protein domain specific binding	GO:0001525//angiogenesis;GO:0001569//branching involved in blood vessel morphogenesis;GO:0001822//kidney development;GO:0003151//outflow tract morphogenesis;GO:0003279//cardiac septum development;GO:0007162//negative regulation of cell adhesion;GO:0007165//signal transduction;GO:0007416//synapse assembly;GO:0008360//regulation of cell shape;GO:0030334//regulation of cell migration;GO:0032092//pos…
ENST00000584499	ENSG00000004399	3.14x10⁻³	-	PLXND1	GO:0002116//semaphorin receptor complex;GO:0005886//plasma membrane;GO:0005887//integral component of plasma membrane;GO:0016020//membrane;GO:0016021//integral component of membrane;GO:0030027//lamellipodium;GO:0031258//lamellipodium membrane;GO:0042995//cell projection	GO:0005515//protein binding;GO:0017154//semaphorin receptor activity;GO:0019904//protein domain specific binding	GO:0001525//angiogenesis;GO:0001569//branching involved in blood vessel morphogenesis;GO:0001822//kidney development;GO:0003151//outflow tract morphogenesis;GO:0003279//cardiac septum development;GO:0007162//negative regulation of cell adhesion;GO:0007165//signal transduction;GO:0007416//synapse assembly;GO:0008360//regulation of cell shape;GO:0030334//regulation of cell migration;GO:0032092//pos…
ENST00000590440	ENSG00000004399	1.12x10⁻⁴	ADAMTSL5-208	PLXND1	GO:0002116//semaphorin receptor complex;GO:0005886//plasma membrane;GO:0005887//integral component of plasma membrane;GO:0016020//membrane;GO:0016021//integral component of membrane;GO:0030027//lamellipodium;GO:0031258//lamellipodium membrane;GO:0042995//cell projection	GO:0005515//protein binding;GO:0017154//semaphorin receptor activity;GO:0019904//protein domain specific binding	GO:0001525//angiogenesis;GO:0001569//branching involved in blood vessel morphogenesis;GO:0001822//kidney development;GO:0003151//outflow tract morphogenesis;GO:0003279//cardiac septum development;GO:0007162//negative regulation of cell adhesion;GO:0007165//signal transduction;GO:0007416//synapse assembly;GO:0008360//regulation of cell shape;GO:0030334//regulation of cell migration;GO:0032092//pos…
ENST00000606242	ENSG00000004399	2.34x10⁻³	LINC01836-202	PLXND1	GO:0002116//semaphorin receptor complex;GO:0005886//plasma membrane;GO:0005887//integral component of plasma membrane;GO:0016020//membrane;GO:0016021//integral component of membrane;GO:0030027//lamellipodium;GO:0031258//lamellipodium membrane;GO:0042995//cell projection	GO:0005515//protein binding;GO:0017154//semaphorin receptor activity;GO:0019904//protein domain specific binding	GO:0001525//angiogenesis;GO:0001569//branching involved in blood vessel morphogenesis;GO:0001822//kidney development;GO:0003151//outflow tract morphogenesis;GO:0003279//cardiac septum development;GO:0007162//negative regulation of cell adhesion;GO:0007165//signal transduction;GO:0007416//synapse assembly;GO:0008360//regulation of cell shape;GO:0030334//regulation of cell migration;GO:0032092//pos…
ENST00000608477	ENSG00000004399	3.00x10⁻³	-	PLXND1	GO:0002116//semaphorin receptor complex;GO:0005886//plasma membrane;GO:0005887//integral component of plasma membrane;GO:0016020//membrane;GO:0016021//integral component of membrane;GO:0030027//lamellipodium;GO:0031258//lamellipodium membrane;GO:0042995//cell projection	GO:0005515//protein binding;GO:0017154//semaphorin receptor activity;GO:0019904//protein domain specific binding	GO:0001525//angiogenesis;GO:0001569//branching involved in blood vessel morphogenesis;GO:0001822//kidney development;GO:0003151//outflow tract morphogenesis;GO:0003279//cardiac septum development;GO:0007162//negative regulation of cell adhesion;GO:0007165//signal transduction;GO:0007416//synapse assembly;GO:0008360//regulation of cell shape;GO:0030334//regulation of cell migration;GO:0032092//pos…
ENST00000616106	ENSG00000004399	1.64x10⁻³	-	PLXND1	GO:0002116//semaphorin receptor complex;GO:0005886//plasma membrane;GO:0005887//integral component of plasma membrane;GO:0016020//membrane;GO:0016021//integral component of membrane;GO:0030027//lamellipodium;GO:0031258//lamellipodium membrane;GO:0042995//cell projection	GO:0005515//protein binding;GO:0017154//semaphorin receptor activity;GO:0019904//protein domain specific binding	GO:0001525//angiogenesis;GO:0001569//branching involved in blood vessel morphogenesis;GO:0001822//kidney development;GO:0003151//outflow tract morphogenesis;GO:0003279//cardiac septum development;GO:0007162//negative regulation of cell adhesion;GO:0007165//signal transduction;GO:0007416//synapse assembly;GO:0008360//regulation of cell shape;GO:0030334//regulation of cell migration;GO:0032092//pos…
ENST00000631190	ENSG00000004399	3.06x10⁻³	LINC00294-201	PLXND1	GO:0002116//semaphorin receptor complex;GO:0005886//plasma membrane;GO:0005887//integral component of plasma membrane;GO:0016020//membrane;GO:0016021//integral component of membrane;GO:0030027//lamellipodium;GO:0031258//lamellipodium membrane;GO:0042995//cell projection	GO:0005515//protein binding;GO:0017154//semaphorin receptor activity;GO:0019904//protein domain specific binding	GO:0001525//angiogenesis;GO:0001569//branching involved in blood vessel morphogenesis;GO:0001822//kidney development;GO:0003151//outflow tract morphogenesis;GO:0003279//cardiac septum development;GO:0007162//negative regulation of cell adhesion;GO:0007165//signal transduction;GO:0007416//synapse assembly;GO:0008360//regulation of cell shape;GO:0030334//regulation of cell migration;GO:0032092//pos…
ENST00000643920	ENSG00000004399	5.25x10⁻⁴	TUG1-215	PLXND1	GO:0002116//semaphorin receptor complex;GO:0005886//plasma membrane;GO:0005887//integral component of plasma membrane;GO:0016020//membrane;GO:0016021//integral component of membrane;GO:0030027//lamellipodium;GO:0031258//lamellipodium membrane;GO:0042995//cell projection	GO:0005515//protein binding;GO:0017154//semaphorin receptor activity;GO:0019904//protein domain specific binding	GO:0001525//angiogenesis;GO:0001569//branching involved in blood vessel morphogenesis;GO:0001822//kidney development;GO:0003151//outflow tract morphogenesis;GO:0003279//cardiac septum development;GO:0007162//negative regulation of cell adhesion;GO:0007165//signal transduction;GO:0007416//synapse assembly;GO:0008360//regulation of cell shape;GO:0030334//regulation of cell migration;GO:0032092//pos…
ENST00000644505	ENSG00000004399	6.65x10⁻⁴	MICAL2-232	PLXND1	GO:0002116//semaphorin receptor complex;GO:0005886//plasma membrane;GO:0005887//integral component of plasma membrane;GO:0016020//membrane;GO:0016021//integral component of membrane;GO:0030027//lamellipodium;GO:0031258//lamellipodium membrane;GO:0042995//cell projection	GO:0005515//protein binding;GO:0017154//semaphorin receptor activity;GO:0019904//protein domain specific binding	GO:0001525//angiogenesis;GO:0001569//branching involved in blood vessel morphogenesis;GO:0001822//kidney development;GO:0003151//outflow tract morphogenesis;GO:0003279//cardiac septum development;GO:0007162//negative regulation of cell adhesion;GO:0007165//signal transduction;GO:0007416//synapse assembly;GO:0008360//regulation of cell shape;GO:0030334//regulation of cell migration;GO:0032092//pos…
ENST00000648623	ENSG00000004399	2.08x10⁻³	LINC00511-243	PLXND1	GO:0002116//semaphorin receptor complex;GO:0005886//plasma membrane;GO:0005887//integral component of plasma membrane;GO:0016020//membrane;GO:0016021//integral component of membrane;GO:0030027//lamellipodium;GO:0031258//lamellipodium membrane;GO:0042995//cell projection	GO:0005515//protein binding;GO:0017154//semaphorin receptor activity;GO:0019904//protein domain specific binding	GO:0001525//angiogenesis;GO:0001569//branching involved in blood vessel morphogenesis;GO:0001822//kidney development;GO:0003151//outflow tract morphogenesis;GO:0003279//cardiac septum development;GO:0007162//negative regulation of cell adhesion;GO:0007165//signal transduction;GO:0007416//synapse assembly;GO:0008360//regulation of cell shape;GO:0030334//regulation of cell migration;GO:0032092//pos…
ENST00000649789	ENSG00000004399	2.84x10⁻³	-	PLXND1	GO:0002116//semaphorin receptor complex;GO:0005886//plasma membrane;GO:0005887//integral component of plasma membrane;GO:0016020//membrane;GO:0016021//integral component of membrane;GO:0030027//lamellipodium;GO:0031258//lamellipodium membrane;GO:0042995//cell projection	GO:0005515//protein binding;GO:0017154//semaphorin receptor activity;GO:0019904//protein domain specific binding	GO:0001525//angiogenesis;GO:0001569//branching involved in blood vessel morphogenesis;GO:0001822//kidney development;GO:0003151//outflow tract morphogenesis;GO:0003279//cardiac septum development;GO:0007162//negative regulation of cell adhesion;GO:0007165//signal transduction;GO:0007416//synapse assembly;GO:0008360//regulation of cell shape;GO:0030334//regulation of cell migration;GO:0032092//pos…
ENST00000654389	ENSG00000004399	2.04x10⁻³	SNHG17-218	PLXND1	GO:0002116//semaphorin receptor complex;GO:0005886//plasma membrane;GO:0005887//integral component of plasma membrane;GO:0016020//membrane;GO:0016021//integral component of membrane;GO:0030027//lamellipodium;GO:0031258//lamellipodium membrane;GO:0042995//cell projection	GO:0005515//protein binding;GO:0017154//semaphorin receptor activity;GO:0019904//protein domain specific binding	GO:0001525//angiogenesis;GO:0001569//branching involved in blood vessel morphogenesis;GO:0001822//kidney development;GO:0003151//outflow tract morphogenesis;GO:0003279//cardiac septum development;GO:0007162//negative regulation of cell adhesion;GO:0007165//signal transduction;GO:0007416//synapse assembly;GO:0008360//regulation of cell shape;GO:0030334//regulation of cell migration;GO:0032092//pos…
ENST00000659452	ENSG00000004399	1.15x10⁻³	-	PLXND1	GO:0002116//semaphorin receptor complex;GO:0005886//plasma membrane;GO:0005887//integral component of plasma membrane;GO:0016020//membrane;GO:0016021//integral component of membrane;GO:0030027//lamellipodium;GO:0031258//lamellipodium membrane;GO:0042995//cell projection	GO:0005515//protein binding;GO:0017154//semaphorin receptor activity;GO:0019904//protein domain specific binding	GO:0001525//angiogenesis;GO:0001569//branching involved in blood vessel morphogenesis;GO:0001822//kidney development;GO:0003151//outflow tract morphogenesis;GO:0003279//cardiac septum development;GO:0007162//negative regulation of cell adhesion;GO:0007165//signal transduction;GO:0007416//synapse assembly;GO:0008360//regulation of cell shape;GO:0030334//regulation of cell migration;GO:0032092//pos…
ENST00000667119	ENSG00000004399	1.71x10⁻³	SNHG15-212	PLXND1	GO:0002116//semaphorin receptor complex;GO:0005886//plasma membrane;GO:0005887//integral component of plasma membrane;GO:0016020//membrane;GO:0016021//integral component of membrane;GO:0030027//lamellipodium;GO:0031258//lamellipodium membrane;GO:0042995//cell projection	GO:0005515//protein binding;GO:0017154//semaphorin receptor activity;GO:0019904//protein domain specific binding	GO:0001525//angiogenesis;GO:0001569//branching involved in blood vessel morphogenesis;GO:0001822//kidney development;GO:0003151//outflow tract morphogenesis;GO:0003279//cardiac septum development;GO:0007162//negative regulation of cell adhesion;GO:0007165//signal transduction;GO:0007416//synapse assembly;GO:0008360//regulation of cell shape;GO:0030334//regulation of cell migration;GO:0032092//pos…
ENST00000676598	ENSG00000004399	5.60x10⁻⁴	PCSK6-222	PLXND1	GO:0002116//semaphorin receptor complex;GO:0005886//plasma membrane;GO:0005887//integral component of plasma membrane;GO:0016020//membrane;GO:0016021//integral component of membrane;GO:0030027//lamellipodium;GO:0031258//lamellipodium membrane;GO:0042995//cell projection	GO:0005515//protein binding;GO:0017154//semaphorin receptor activity;GO:0019904//protein domain specific binding	GO:0001525//angiogenesis;GO:0001569//branching involved in blood vessel morphogenesis;GO:0001822//kidney development;GO:0003151//outflow tract morphogenesis;GO:0003279//cardiac septum development;GO:0007162//negative regulation of cell adhesion;GO:0007165//signal transduction;GO:0007416//synapse assembly;GO:0008360//regulation of cell shape;GO:0030334//regulation of cell migration;GO:0032092//pos…
ENST00000683492	ENSG00000004399	1.23x10⁻³	ZNF107-209	PLXND1	GO:0002116//semaphorin receptor complex;GO:0005886//plasma membrane;GO:0005887//integral component of plasma membrane;GO:0016020//membrane;GO:0016021//integral component of membrane;GO:0030027//lamellipodium;GO:0031258//lamellipodium membrane;GO:0042995//cell projection	GO:0005515//protein binding;GO:0017154//semaphorin receptor activity;GO:0019904//protein domain specific binding	GO:0001525//angiogenesis;GO:0001569//branching involved in blood vessel morphogenesis;GO:0001822//kidney development;GO:0003151//outflow tract morphogenesis;GO:0003279//cardiac septum development;GO:0007162//negative regulation of cell adhesion;GO:0007165//signal transduction;GO:0007416//synapse assembly;GO:0008360//regulation of cell shape;GO:0030334//regulation of cell migration;GO:0032092//pos…
ENST00000687035	ENSG00000004399	1.35x10⁻³	-	PLXND1	GO:0002116//semaphorin receptor complex;GO:0005886//plasma membrane;GO:0005887//integral component of plasma membrane;GO:0016020//membrane;GO:0016021//integral component of membrane;GO:0030027//lamellipodium;GO:0031258//lamellipodium membrane;GO:0042995//cell projection	GO:0005515//protein binding;GO:0017154//semaphorin receptor activity;GO:0019904//protein domain specific binding	GO:0001525//angiogenesis;GO:0001569//branching involved in blood vessel morphogenesis;GO:0001822//kidney development;GO:0003151//outflow tract morphogenesis;GO:0003279//cardiac septum development;GO:0007162//negative regulation of cell adhesion;GO:0007165//signal transduction;GO:0007416//synapse assembly;GO:0008360//regulation of cell shape;GO:0030334//regulation of cell migration;GO:0032092//pos…
ENST00000687575	ENSG00000004399	1.35x10⁻³	-	PLXND1	GO:0002116//semaphorin receptor complex;GO:0005886//plasma membrane;GO:0005887//integral component of plasma membrane;GO:0016020//membrane;GO:0016021//integral component of membrane;GO:0030027//lamellipodium;GO:0031258//lamellipodium membrane;GO:0042995//cell projection	GO:0005515//protein binding;GO:0017154//semaphorin receptor activity;GO:0019904//protein domain specific binding	GO:0001525//angiogenesis;GO:0001569//branching involved in blood vessel morphogenesis;GO:0001822//kidney development;GO:0003151//outflow tract morphogenesis;GO:0003279//cardiac septum development;GO:0007162//negative regulation of cell adhesion;GO:0007165//signal transduction;GO:0007416//synapse assembly;GO:0008360//regulation of cell shape;GO:0030334//regulation of cell migration;GO:0032092//pos…
ENST00000691693	ENSG00000004399	2.55x10⁻³	CCR5AS-203	PLXND1	GO:0002116//semaphorin receptor complex;GO:0005886//plasma membrane;GO:0005887//integral component of plasma membrane;GO:0016020//membrane;GO:0016021//integral component of membrane;GO:0030027//lamellipodium;GO:0031258//lamellipodium membrane;GO:0042995//cell projection	GO:0005515//protein binding;GO:0017154//semaphorin receptor activity;GO:0019904//protein domain specific binding	GO:0001525//angiogenesis;GO:0001569//branching involved in blood vessel morphogenesis;GO:0001822//kidney development;GO:0003151//outflow tract morphogenesis;GO:0003279//cardiac septum development;GO:0007162//negative regulation of cell adhesion;GO:0007165//signal transduction;GO:0007416//synapse assembly;GO:0008360//regulation of cell shape;GO:0030334//regulation of cell migration;GO:0032092//pos…
MSTRG.10478.1	ENSG00000004399	8.85x10⁻⁴	-	PLXND1	GO:0002116//semaphorin receptor complex;GO:0005886//plasma membrane;GO:0005887//integral component of plasma membrane;GO:0016020//membrane;GO:0016021//integral component of membrane;GO:0030027//lamellipodium;GO:0031258//lamellipodium membrane;GO:0042995//cell projection	GO:0005515//protein binding;GO:0017154//semaphorin receptor activity;GO:0019904//protein domain specific binding	GO:0001525//angiogenesis;GO:0001569//branching involved in blood vessel morphogenesis;GO:0001822//kidney development;GO:0003151//outflow tract morphogenesis;GO:0003279//cardiac septum development;GO:0007162//negative regulation of cell adhesion;GO:0007165//signal transduction;GO:0007416//synapse assembly;GO:0008360//regulation of cell shape;GO:0030334//regulation of cell migration;GO:0032092//pos…
MSTRG.14210.2	ENSG00000004399	6.04x10⁻⁵	-	PLXND1	GO:0002116//semaphorin receptor complex;GO:0005886//plasma membrane;GO:0005887//integral component of plasma membrane;GO:0016020//membrane;GO:0016021//integral component of membrane;GO:0030027//lamellipodium;GO:0031258//lamellipodium membrane;GO:0042995//cell projection	GO:0005515//protein binding;GO:0017154//semaphorin receptor activity;GO:0019904//protein domain specific binding	GO:0001525//angiogenesis;GO:0001569//branching involved in blood vessel morphogenesis;GO:0001822//kidney development;GO:0003151//outflow tract morphogenesis;GO:0003279//cardiac septum development;GO:0007162//negative regulation of cell adhesion;GO:0007165//signal transduction;GO:0007416//synapse assembly;GO:0008360//regulation of cell shape;GO:0030334//regulation of cell migration;GO:0032092//pos…
MSTRG.14740.4	ENSG00000004399	2.57x10⁻⁴	-	PLXND1	GO:0002116//semaphorin receptor complex;GO:0005886//plasma membrane;GO:0005887//integral component of plasma membrane;GO:0016020//membrane;GO:0016021//integral component of membrane;GO:0030027//lamellipodium;GO:0031258//lamellipodium membrane;GO:0042995//cell projection	GO:0005515//protein binding;GO:0017154//semaphorin receptor activity;GO:0019904//protein domain specific binding	GO:0001525//angiogenesis;GO:0001569//branching involved in blood vessel morphogenesis;GO:0001822//kidney development;GO:0003151//outflow tract morphogenesis;GO:0003279//cardiac septum development;GO:0007162//negative regulation of cell adhesion;GO:0007165//signal transduction;GO:0007416//synapse assembly;GO:0008360//regulation of cell shape;GO:0030334//regulation of cell migration;GO:0032092//pos…
MSTRG.16535.1	ENSG00000004399	1.28x10⁻³	-	PLXND1	GO:0002116//semaphorin receptor complex;GO:0005886//plasma membrane;GO:0005887//integral component of plasma membrane;GO:0016020//membrane;GO:0016021//integral component of membrane;GO:0030027//lamellipodium;GO:0031258//lamellipodium membrane;GO:0042995//cell projection	GO:0005515//protein binding;GO:0017154//semaphorin receptor activity;GO:0019904//protein domain specific binding	GO:0001525//angiogenesis;GO:0001569//branching involved in blood vessel morphogenesis;GO:0001822//kidney development;GO:0003151//outflow tract morphogenesis;GO:0003279//cardiac septum development;GO:0007162//negative regulation of cell adhesion;GO:0007165//signal transduction;GO:0007416//synapse assembly;GO:0008360//regulation of cell shape;GO:0030334//regulation of cell migration;GO:0032092//pos…
MSTRG.19229.3	ENSG00000004399	3.32x10⁻³	-	PLXND1	GO:0002116//semaphorin receptor complex;GO:0005886//plasma membrane;GO:0005887//integral component of plasma membrane;GO:0016020//membrane;GO:0016021//integral component of membrane;GO:0030027//lamellipodium;GO:0031258//lamellipodium membrane;GO:0042995//cell projection	GO:0005515//protein binding;GO:0017154//semaphorin receptor activity;GO:0019904//protein domain specific binding	GO:0001525//angiogenesis;GO:0001569//branching involved in blood vessel morphogenesis;GO:0001822//kidney development;GO:0003151//outflow tract morphogenesis;GO:0003279//cardiac septum development;GO:0007162//negative regulation of cell adhesion;GO:0007165//signal transduction;GO:0007416//synapse assembly;GO:0008360//regulation of cell shape;GO:0030334//regulation of cell migration;GO:0032092//pos…
MSTRG.19288.1	ENSG00000004399	3.31x10⁻³	-	PLXND1	GO:0002116//semaphorin receptor complex;GO:0005886//plasma membrane;GO:0005887//integral component of plasma membrane;GO:0016020//membrane;GO:0016021//integral component of membrane;GO:0030027//lamellipodium;GO:0031258//lamellipodium membrane;GO:0042995//cell projection	GO:0005515//protein binding;GO:0017154//semaphorin receptor activity;GO:0019904//protein domain specific binding	GO:0001525//angiogenesis;GO:0001569//branching involved in blood vessel morphogenesis;GO:0001822//kidney development;GO:0003151//outflow tract morphogenesis;GO:0003279//cardiac septum development;GO:0007162//negative regulation of cell adhesion;GO:0007165//signal transduction;GO:0007416//synapse assembly;GO:0008360//regulation of cell shape;GO:0030334//regulation of cell migration;GO:0032092//pos…
MSTRG.19368.1	ENSG00000004399	2.14x10⁻³	-	PLXND1	GO:0002116//semaphorin receptor complex;GO:0005886//plasma membrane;GO:0005887//integral component of plasma membrane;GO:0016020//membrane;GO:0016021//integral component of membrane;GO:0030027//lamellipodium;GO:0031258//lamellipodium membrane;GO:0042995//cell projection	GO:0005515//protein binding;GO:0017154//semaphorin receptor activity;GO:0019904//protein domain specific binding	GO:0001525//angiogenesis;GO:0001569//branching involved in blood vessel morphogenesis;GO:0001822//kidney development;GO:0003151//outflow tract morphogenesis;GO:0003279//cardiac septum development;GO:0007162//negative regulation of cell adhesion;GO:0007165//signal transduction;GO:0007416//synapse assembly;GO:0008360//regulation of cell shape;GO:0030334//regulation of cell migration;GO:0032092//pos…
MSTRG.19372.1	ENSG00000004399	3.52x10⁻³	-	PLXND1	GO:0002116//semaphorin receptor complex;GO:0005886//plasma membrane;GO:0005887//integral component of plasma membrane;GO:0016020//membrane;GO:0016021//integral component of membrane;GO:0030027//lamellipodium;GO:0031258//lamellipodium membrane;GO:0042995//cell projection	GO:0005515//protein binding;GO:0017154//semaphorin receptor activity;GO:0019904//protein domain specific binding	GO:0001525//angiogenesis;GO:0001569//branching involved in blood vessel morphogenesis;GO:0001822//kidney development;GO:0003151//outflow tract morphogenesis;GO:0003279//cardiac septum development;GO:0007162//negative regulation of cell adhesion;GO:0007165//signal transduction;GO:0007416//synapse assembly;GO:0008360//regulation of cell shape;GO:0030334//regulation of cell migration;GO:0032092//pos…
MSTRG.19832.3	ENSG00000004399	8.10x10⁻⁴	-	PLXND1	GO:0002116//semaphorin receptor complex;GO:0005886//plasma membrane;GO:0005887//integral component of plasma membrane;GO:0016020//membrane;GO:0016021//integral component of membrane;GO:0030027//lamellipodium;GO:0031258//lamellipodium membrane;GO:0042995//cell projection	GO:0005515//protein binding;GO:0017154//semaphorin receptor activity;GO:0019904//protein domain specific binding	GO:0001525//angiogenesis;GO:0001569//branching involved in blood vessel morphogenesis;GO:0001822//kidney development;GO:0003151//outflow tract morphogenesis;GO:0003279//cardiac septum development;GO:0007162//negative regulation of cell adhesion;GO:0007165//signal transduction;GO:0007416//synapse assembly;GO:0008360//regulation of cell shape;GO:0030334//regulation of cell migration;GO:0032092//pos…
MSTRG.20287.2	ENSG00000004399	2.35x10⁻³	-	PLXND1	GO:0002116//semaphorin receptor complex;GO:0005886//plasma membrane;GO:0005887//integral component of plasma membrane;GO:0016020//membrane;GO:0016021//integral component of membrane;GO:0030027//lamellipodium;GO:0031258//lamellipodium membrane;GO:0042995//cell projection	GO:0005515//protein binding;GO:0017154//semaphorin receptor activity;GO:0019904//protein domain specific binding	GO:0001525//angiogenesis;GO:0001569//branching involved in blood vessel morphogenesis;GO:0001822//kidney development;GO:0003151//outflow tract morphogenesis;GO:0003279//cardiac septum development;GO:0007162//negative regulation of cell adhesion;GO:0007165//signal transduction;GO:0007416//synapse assembly;GO:0008360//regulation of cell shape;GO:0030334//regulation of cell migration;GO:0032092//pos…
MSTRG.20291.1	ENSG00000004399	4.80x10⁻⁴	-	PLXND1	GO:0002116//semaphorin receptor complex;GO:0005886//plasma membrane;GO:0005887//integral component of plasma membrane;GO:0016020//membrane;GO:0016021//integral component of membrane;GO:0030027//lamellipodium;GO:0031258//lamellipodium membrane;GO:0042995//cell projection	GO:0005515//protein binding;GO:0017154//semaphorin receptor activity;GO:0019904//protein domain specific binding	GO:0001525//angiogenesis;GO:0001569//branching involved in blood vessel morphogenesis;GO:0001822//kidney development;GO:0003151//outflow tract morphogenesis;GO:0003279//cardiac septum development;GO:0007162//negative regulation of cell adhesion;GO:0007165//signal transduction;GO:0007416//synapse assembly;GO:0008360//regulation of cell shape;GO:0030334//regulation of cell migration;GO:0032092//pos…
MSTRG.25888.1	ENSG00000004399	2.82x10⁻³	-	PLXND1	GO:0002116//semaphorin receptor complex;GO:0005886//plasma membrane;GO:0005887//integral component of plasma membrane;GO:0016020//membrane;GO:0016021//integral component of membrane;GO:0030027//lamellipodium;GO:0031258//lamellipodium membrane;GO:0042995//cell projection	GO:0005515//protein binding;GO:0017154//semaphorin receptor activity;GO:0019904//protein domain specific binding	GO:0001525//angiogenesis;GO:0001569//branching involved in blood vessel morphogenesis;GO:0001822//kidney development;GO:0003151//outflow tract morphogenesis;GO:0003279//cardiac septum development;GO:0007162//negative regulation of cell adhesion;GO:0007165//signal transduction;GO:0007416//synapse assembly;GO:0008360//regulation of cell shape;GO:0030334//regulation of cell migration;GO:0032092//pos…
MSTRG.2870.10	ENSG00000004399	1.88x10⁻³	-	PLXND1	GO:0002116//semaphorin receptor complex;GO:0005886//plasma membrane;GO:0005887//integral component of plasma membrane;GO:0016020//membrane;GO:0016021//integral component of membrane;GO:0030027//lamellipodium;GO:0031258//lamellipodium membrane;GO:0042995//cell projection	GO:0005515//protein binding;GO:0017154//semaphorin receptor activity;GO:0019904//protein domain specific binding	GO:0001525//angiogenesis;GO:0001569//branching involved in blood vessel morphogenesis;GO:0001822//kidney development;GO:0003151//outflow tract morphogenesis;GO:0003279//cardiac septum development;GO:0007162//negative regulation of cell adhesion;GO:0007165//signal transduction;GO:0007416//synapse assembly;GO:0008360//regulation of cell shape;GO:0030334//regulation of cell migration;GO:0032092//pos…
MSTRG.4038.1	ENSG00000004399	1.74x10⁻³	-	PLXND1	GO:0002116//semaphorin receptor complex;GO:0005886//plasma membrane;GO:0005887//integral component of plasma membrane;GO:0016020//membrane;GO:0016021//integral component of membrane;GO:0030027//lamellipodium;GO:0031258//lamellipodium membrane;GO:0042995//cell projection	GO:0005515//protein binding;GO:0017154//semaphorin receptor activity;GO:0019904//protein domain specific binding	GO:0001525//angiogenesis;GO:0001569//branching involved in blood vessel morphogenesis;GO:0001822//kidney development;GO:0003151//outflow tract morphogenesis;GO:0003279//cardiac septum development;GO:0007162//negative regulation of cell adhesion;GO:0007165//signal transduction;GO:0007416//synapse assembly;GO:0008360//regulation of cell shape;GO:0030334//regulation of cell migration;GO:0032092//pos…
MSTRG.6200.2	ENSG00000004399	3.04x10⁻³	-	PLXND1	GO:0002116//semaphorin receptor complex;GO:0005886//plasma membrane;GO:0005887//integral component of plasma membrane;GO:0016020//membrane;GO:0016021//integral component of membrane;GO:0030027//lamellipodium;GO:0031258//lamellipodium membrane;GO:0042995//cell projection	GO:0005515//protein binding;GO:0017154//semaphorin receptor activity;GO:0019904//protein domain specific binding	GO:0001525//angiogenesis;GO:0001569//branching involved in blood vessel morphogenesis;GO:0001822//kidney development;GO:0003151//outflow tract morphogenesis;GO:0003279//cardiac septum development;GO:0007162//negative regulation of cell adhesion;GO:0007165//signal transduction;GO:0007416//synapse assembly;GO:0008360//regulation of cell shape;GO:0030334//regulation of cell migration;GO:0032092//pos…
MSTRG.7196.4	ENSG00000004399	2.11x10⁻³	-	PLXND1	GO:0002116//semaphorin receptor complex;GO:0005886//plasma membrane;GO:0005887//integral component of plasma membrane;GO:0016020//membrane;GO:0016021//integral component of membrane;GO:0030027//lamellipodium;GO:0031258//lamellipodium membrane;GO:0042995//cell projection	GO:0005515//protein binding;GO:0017154//semaphorin receptor activity;GO:0019904//protein domain specific binding	GO:0001525//angiogenesis;GO:0001569//branching involved in blood vessel morphogenesis;GO:0001822//kidney development;GO:0003151//outflow tract morphogenesis;GO:0003279//cardiac septum development;GO:0007162//negative regulation of cell adhesion;GO:0007165//signal transduction;GO:0007416//synapse assembly;GO:0008360//regulation of cell shape;GO:0030334//regulation of cell migration;GO:0032092//pos…
MSTRG.7205.1	ENSG00000004399	2.57x10⁻³	-	PLXND1	GO:0002116//semaphorin receptor complex;GO:0005886//plasma membrane;GO:0005887//integral component of plasma membrane;GO:0016020//membrane;GO:0016021//integral component of membrane;GO:0030027//lamellipodium;GO:0031258//lamellipodium membrane;GO:0042995//cell projection	GO:0005515//protein binding;GO:0017154//semaphorin receptor activity;GO:0019904//protein domain specific binding	GO:0001525//angiogenesis;GO:0001569//branching involved in blood vessel morphogenesis;GO:0001822//kidney development;GO:0003151//outflow tract morphogenesis;GO:0003279//cardiac septum development;GO:0007162//negative regulation of cell adhesion;GO:0007165//signal transduction;GO:0007416//synapse assembly;GO:0008360//regulation of cell shape;GO:0030334//regulation of cell migration;GO:0032092//pos…
MSTRG.7207.1	ENSG00000004399	3.01x10⁻³	-	PLXND1	GO:0002116//semaphorin receptor complex;GO:0005886//plasma membrane;GO:0005887//integral component of plasma membrane;GO:0016020//membrane;GO:0016021//integral component of membrane;GO:0030027//lamellipodium;GO:0031258//lamellipodium membrane;GO:0042995//cell projection	GO:0005515//protein binding;GO:0017154//semaphorin receptor activity;GO:0019904//protein domain specific binding	GO:0001525//angiogenesis;GO:0001569//branching involved in blood vessel morphogenesis;GO:0001822//kidney development;GO:0003151//outflow tract morphogenesis;GO:0003279//cardiac septum development;GO:0007162//negative regulation of cell adhesion;GO:0007165//signal transduction;GO:0007416//synapse assembly;GO:0008360//regulation of cell shape;GO:0030334//regulation of cell migration;GO:0032092//pos…
ENST00000391874	ENSG00000004468	3.11x10⁻³	ENAH-205	CD38	GO:0005634//nucleus;GO:0005886//plasma membrane;GO:0009986//cell surface;GO:0016020//membrane;GO:0016021//integral component of membrane;GO:0016323//basolateral plasma membrane;GO:0030667//secretory granule membrane;GO:0043231//intracellular membrane-bounded organelle;GO:0070062//extracellular exosome	GO:0003953//NAD+ nucleosidase activity;GO:0016740//transferase activity;GO:0016787//hydrolase activity;GO:0016798//hydrolase activity, acting on glycosyl bonds;GO:0016849//phosphorus-oxygen lyase activity;GO:0042802//identical protein binding;GO:0050135//NAD(P)+ nucleosidase activity;GO:0061809//NAD+ nucleotidase, cyclic ADP-ribose generating	GO:0001666//response to hypoxia;GO:0007165//signal transduction;GO:0007204//positive regulation of cytosolic calcium ion concentration;GO:0007565//female pregnancy;GO:0008284//positive regulation of cell population proliferation;GO:0009410//response to xenobiotic stimulus;GO:0009725//response to hormone;GO:0010977//negative regulation of neuron projection development;GO:0014824//artery smooth mus…
ENST00000423891	ENSG00000004468	1.53x10⁻³	JAG1-202	CD38	GO:0005634//nucleus;GO:0005886//plasma membrane;GO:0009986//cell surface;GO:0016020//membrane;GO:0016021//integral component of membrane;GO:0016323//basolateral plasma membrane;GO:0030667//secretory granule membrane;GO:0043231//intracellular membrane-bounded organelle;GO:0070062//extracellular exosome	GO:0003953//NAD+ nucleosidase activity;GO:0016740//transferase activity;GO:0016787//hydrolase activity;GO:0016798//hydrolase activity, acting on glycosyl bonds;GO:0016849//phosphorus-oxygen lyase activity;GO:0042802//identical protein binding;GO:0050135//NAD(P)+ nucleosidase activity;GO:0061809//NAD+ nucleotidase, cyclic ADP-ribose generating	GO:0001666//response to hypoxia;GO:0007165//signal transduction;GO:0007204//positive regulation of cytosolic calcium ion concentration;GO:0007565//female pregnancy;GO:0008284//positive regulation of cell population proliferation;GO:0009410//response to xenobiotic stimulus;GO:0009725//response to hormone;GO:0010977//negative regulation of neuron projection development;GO:0014824//artery smooth mus…
ENST00000477661	ENSG00000004468	2.89x10⁻³	AKR1C1-205	CD38	GO:0005634//nucleus;GO:0005886//plasma membrane;GO:0009986//cell surface;GO:0016020//membrane;GO:0016021//integral component of membrane;GO:0016323//basolateral plasma membrane;GO:0030667//secretory granule membrane;GO:0043231//intracellular membrane-bounded organelle;GO:0070062//extracellular exosome	GO:0003953//NAD+ nucleosidase activity;GO:0016740//transferase activity;GO:0016787//hydrolase activity;GO:0016798//hydrolase activity, acting on glycosyl bonds;GO:0016849//phosphorus-oxygen lyase activity;GO:0042802//identical protein binding;GO:0050135//NAD(P)+ nucleosidase activity;GO:0061809//NAD+ nucleotidase, cyclic ADP-ribose generating	GO:0001666//response to hypoxia;GO:0007165//signal transduction;GO:0007204//positive regulation of cytosolic calcium ion concentration;GO:0007565//female pregnancy;GO:0008284//positive regulation of cell population proliferation;GO:0009410//response to xenobiotic stimulus;GO:0009725//response to hormone;GO:0010977//negative regulation of neuron projection development;GO:0014824//artery smooth mus…
ENST00000480212	ENSG00000004468	1.24x10⁻³	CD302-203	CD38	GO:0005634//nucleus;GO:0005886//plasma membrane;GO:0009986//cell surface;GO:0016020//membrane;GO:0016021//integral component of membrane;GO:0016323//basolateral plasma membrane;GO:0030667//secretory granule membrane;GO:0043231//intracellular membrane-bounded organelle;GO:0070062//extracellular exosome	GO:0003953//NAD+ nucleosidase activity;GO:0016740//transferase activity;GO:0016787//hydrolase activity;GO:0016798//hydrolase activity, acting on glycosyl bonds;GO:0016849//phosphorus-oxygen lyase activity;GO:0042802//identical protein binding;GO:0050135//NAD(P)+ nucleosidase activity;GO:0061809//NAD+ nucleotidase, cyclic ADP-ribose generating	GO:0001666//response to hypoxia;GO:0007165//signal transduction;GO:0007204//positive regulation of cytosolic calcium ion concentration;GO:0007565//female pregnancy;GO:0008284//positive regulation of cell population proliferation;GO:0009410//response to xenobiotic stimulus;GO:0009725//response to hormone;GO:0010977//negative regulation of neuron projection development;GO:0014824//artery smooth mus…
ENST00000481527	ENSG00000004468	3.46x10⁻³	ACOX2-211	CD38	GO:0005634//nucleus;GO:0005886//plasma membrane;GO:0009986//cell surface;GO:0016020//membrane;GO:0016021//integral component of membrane;GO:0016323//basolateral plasma membrane;GO:0030667//secretory granule membrane;GO:0043231//intracellular membrane-bounded organelle;GO:0070062//extracellular exosome	GO:0003953//NAD+ nucleosidase activity;GO:0016740//transferase activity;GO:0016787//hydrolase activity;GO:0016798//hydrolase activity, acting on glycosyl bonds;GO:0016849//phosphorus-oxygen lyase activity;GO:0042802//identical protein binding;GO:0050135//NAD(P)+ nucleosidase activity;GO:0061809//NAD+ nucleotidase, cyclic ADP-ribose generating	GO:0001666//response to hypoxia;GO:0007165//signal transduction;GO:0007204//positive regulation of cytosolic calcium ion concentration;GO:0007565//female pregnancy;GO:0008284//positive regulation of cell population proliferation;GO:0009410//response to xenobiotic stimulus;GO:0009725//response to hormone;GO:0010977//negative regulation of neuron projection development;GO:0014824//artery smooth mus…
ENST00000508785	ENSG00000004468	3.17x10⁻³	MACROH2A1-213	CD38	GO:0005634//nucleus;GO:0005886//plasma membrane;GO:0009986//cell surface;GO:0016020//membrane;GO:0016021//integral component of membrane;GO:0016323//basolateral plasma membrane;GO:0030667//secretory granule membrane;GO:0043231//intracellular membrane-bounded organelle;GO:0070062//extracellular exosome	GO:0003953//NAD+ nucleosidase activity;GO:0016740//transferase activity;GO:0016787//hydrolase activity;GO:0016798//hydrolase activity, acting on glycosyl bonds;GO:0016849//phosphorus-oxygen lyase activity;GO:0042802//identical protein binding;GO:0050135//NAD(P)+ nucleosidase activity;GO:0061809//NAD+ nucleotidase, cyclic ADP-ribose generating	GO:0001666//response to hypoxia;GO:0007165//signal transduction;GO:0007204//positive regulation of cytosolic calcium ion concentration;GO:0007565//female pregnancy;GO:0008284//positive regulation of cell population proliferation;GO:0009410//response to xenobiotic stimulus;GO:0009725//response to hormone;GO:0010977//negative regulation of neuron projection development;GO:0014824//artery smooth mus…
ENST00000519691	ENSG00000004468	1.16x10⁻³	-	CD38	GO:0005634//nucleus;GO:0005886//plasma membrane;GO:0009986//cell surface;GO:0016020//membrane;GO:0016021//integral component of membrane;GO:0016323//basolateral plasma membrane;GO:0030667//secretory granule membrane;GO:0043231//intracellular membrane-bounded organelle;GO:0070062//extracellular exosome	GO:0003953//NAD+ nucleosidase activity;GO:0016740//transferase activity;GO:0016787//hydrolase activity;GO:0016798//hydrolase activity, acting on glycosyl bonds;GO:0016849//phosphorus-oxygen lyase activity;GO:0042802//identical protein binding;GO:0050135//NAD(P)+ nucleosidase activity;GO:0061809//NAD+ nucleotidase, cyclic ADP-ribose generating	GO:0001666//response to hypoxia;GO:0007165//signal transduction;GO:0007204//positive regulation of cytosolic calcium ion concentration;GO:0007565//female pregnancy;GO:0008284//positive regulation of cell population proliferation;GO:0009410//response to xenobiotic stimulus;GO:0009725//response to hormone;GO:0010977//negative regulation of neuron projection development;GO:0014824//artery smooth mus…
ENST00000551988	ENSG00000004468	3.87x10⁻⁴	PAH-213	CD38	GO:0005634//nucleus;GO:0005886//plasma membrane;GO:0009986//cell surface;GO:0016020//membrane;GO:0016021//integral component of membrane;GO:0016323//basolateral plasma membrane;GO:0030667//secretory granule membrane;GO:0043231//intracellular membrane-bounded organelle;GO:0070062//extracellular exosome	GO:0003953//NAD+ nucleosidase activity;GO:0016740//transferase activity;GO:0016787//hydrolase activity;GO:0016798//hydrolase activity, acting on glycosyl bonds;GO:0016849//phosphorus-oxygen lyase activity;GO:0042802//identical protein binding;GO:0050135//NAD(P)+ nucleosidase activity;GO:0061809//NAD+ nucleotidase, cyclic ADP-ribose generating	GO:0001666//response to hypoxia;GO:0007165//signal transduction;GO:0007204//positive regulation of cytosolic calcium ion concentration;GO:0007565//female pregnancy;GO:0008284//positive regulation of cell population proliferation;GO:0009410//response to xenobiotic stimulus;GO:0009725//response to hormone;GO:0010977//negative regulation of neuron projection development;GO:0014824//artery smooth mus…
ENST00000567832	ENSG00000004468	3.28x10⁻⁴	-	CD38	GO:0005634//nucleus;GO:0005886//plasma membrane;GO:0009986//cell surface;GO:0016020//membrane;GO:0016021//integral component of membrane;GO:0016323//basolateral plasma membrane;GO:0030667//secretory granule membrane;GO:0043231//intracellular membrane-bounded organelle;GO:0070062//extracellular exosome	GO:0003953//NAD+ nucleosidase activity;GO:0016740//transferase activity;GO:0016787//hydrolase activity;GO:0016798//hydrolase activity, acting on glycosyl bonds;GO:0016849//phosphorus-oxygen lyase activity;GO:0042802//identical protein binding;GO:0050135//NAD(P)+ nucleosidase activity;GO:0061809//NAD+ nucleotidase, cyclic ADP-ribose generating	GO:0001666//response to hypoxia;GO:0007165//signal transduction;GO:0007204//positive regulation of cytosolic calcium ion concentration;GO:0007565//female pregnancy;GO:0008284//positive regulation of cell population proliferation;GO:0009410//response to xenobiotic stimulus;GO:0009725//response to hormone;GO:0010977//negative regulation of neuron projection development;GO:0014824//artery smooth mus…
ENST00000577038	ENSG00000004468	2.68x10⁻³	MMD-203	CD38	GO:0005634//nucleus;GO:0005886//plasma membrane;GO:0009986//cell surface;GO:0016020//membrane;GO:0016021//integral component of membrane;GO:0016323//basolateral plasma membrane;GO:0030667//secretory granule membrane;GO:0043231//intracellular membrane-bounded organelle;GO:0070062//extracellular exosome	GO:0003953//NAD+ nucleosidase activity;GO:0016740//transferase activity;GO:0016787//hydrolase activity;GO:0016798//hydrolase activity, acting on glycosyl bonds;GO:0016849//phosphorus-oxygen lyase activity;GO:0042802//identical protein binding;GO:0050135//NAD(P)+ nucleosidase activity;GO:0061809//NAD+ nucleotidase, cyclic ADP-ribose generating	GO:0001666//response to hypoxia;GO:0007165//signal transduction;GO:0007204//positive regulation of cytosolic calcium ion concentration;GO:0007565//female pregnancy;GO:0008284//positive regulation of cell population proliferation;GO:0009410//response to xenobiotic stimulus;GO:0009725//response to hormone;GO:0010977//negative regulation of neuron projection development;GO:0014824//artery smooth mus…
ENST00000590797	ENSG00000004468	1.20x10⁻³	MIR122HG-201	CD38	GO:0005634//nucleus;GO:0005886//plasma membrane;GO:0009986//cell surface;GO:0016020//membrane;GO:0016021//integral component of membrane;GO:0016323//basolateral plasma membrane;GO:0030667//secretory granule membrane;GO:0043231//intracellular membrane-bounded organelle;GO:0070062//extracellular exosome	GO:0003953//NAD+ nucleosidase activity;GO:0016740//transferase activity;GO:0016787//hydrolase activity;GO:0016798//hydrolase activity, acting on glycosyl bonds;GO:0016849//phosphorus-oxygen lyase activity;GO:0042802//identical protein binding;GO:0050135//NAD(P)+ nucleosidase activity;GO:0061809//NAD+ nucleotidase, cyclic ADP-ribose generating	GO:0001666//response to hypoxia;GO:0007165//signal transduction;GO:0007204//positive regulation of cytosolic calcium ion concentration;GO:0007565//female pregnancy;GO:0008284//positive regulation of cell population proliferation;GO:0009410//response to xenobiotic stimulus;GO:0009725//response to hormone;GO:0010977//negative regulation of neuron projection development;GO:0014824//artery smooth mus…
ENST00000613291	ENSG00000004468	2.43x10⁻³	-	CD38	GO:0005634//nucleus;GO:0005886//plasma membrane;GO:0009986//cell surface;GO:0016020//membrane;GO:0016021//integral component of membrane;GO:0016323//basolateral plasma membrane;GO:0030667//secretory granule membrane;GO:0043231//intracellular membrane-bounded organelle;GO:0070062//extracellular exosome	GO:0003953//NAD+ nucleosidase activity;GO:0016740//transferase activity;GO:0016787//hydrolase activity;GO:0016798//hydrolase activity, acting on glycosyl bonds;GO:0016849//phosphorus-oxygen lyase activity;GO:0042802//identical protein binding;GO:0050135//NAD(P)+ nucleosidase activity;GO:0061809//NAD+ nucleotidase, cyclic ADP-ribose generating	GO:0001666//response to hypoxia;GO:0007165//signal transduction;GO:0007204//positive regulation of cytosolic calcium ion concentration;GO:0007565//female pregnancy;GO:0008284//positive regulation of cell population proliferation;GO:0009410//response to xenobiotic stimulus;GO:0009725//response to hormone;GO:0010977//negative regulation of neuron projection development;GO:0014824//artery smooth mus…
ENST00000631190	ENSG00000004468	1.63x10⁻³	LINC00294-201	CD38	GO:0005634//nucleus;GO:0005886//plasma membrane;GO:0009986//cell surface;GO:0016020//membrane;GO:0016021//integral component of membrane;GO:0016323//basolateral plasma membrane;GO:0030667//secretory granule membrane;GO:0043231//intracellular membrane-bounded organelle;GO:0070062//extracellular exosome	GO:0003953//NAD+ nucleosidase activity;GO:0016740//transferase activity;GO:0016787//hydrolase activity;GO:0016798//hydrolase activity, acting on glycosyl bonds;GO:0016849//phosphorus-oxygen lyase activity;GO:0042802//identical protein binding;GO:0050135//NAD(P)+ nucleosidase activity;GO:0061809//NAD+ nucleotidase, cyclic ADP-ribose generating	GO:0001666//response to hypoxia;GO:0007165//signal transduction;GO:0007204//positive regulation of cytosolic calcium ion concentration;GO:0007565//female pregnancy;GO:0008284//positive regulation of cell population proliferation;GO:0009410//response to xenobiotic stimulus;GO:0009725//response to hormone;GO:0010977//negative regulation of neuron projection development;GO:0014824//artery smooth mus…
ENST00000659781	ENSG00000004468	4.98x10⁻⁴	LINC02432-207	CD38	GO:0005634//nucleus;GO:0005886//plasma membrane;GO:0009986//cell surface;GO:0016020//membrane;GO:0016021//integral component of membrane;GO:0016323//basolateral plasma membrane;GO:0030667//secretory granule membrane;GO:0043231//intracellular membrane-bounded organelle;GO:0070062//extracellular exosome	GO:0003953//NAD+ nucleosidase activity;GO:0016740//transferase activity;GO:0016787//hydrolase activity;GO:0016798//hydrolase activity, acting on glycosyl bonds;GO:0016849//phosphorus-oxygen lyase activity;GO:0042802//identical protein binding;GO:0050135//NAD(P)+ nucleosidase activity;GO:0061809//NAD+ nucleotidase, cyclic ADP-ribose generating	GO:0001666//response to hypoxia;GO:0007165//signal transduction;GO:0007204//positive regulation of cytosolic calcium ion concentration;GO:0007565//female pregnancy;GO:0008284//positive regulation of cell population proliferation;GO:0009410//response to xenobiotic stimulus;GO:0009725//response to hormone;GO:0010977//negative regulation of neuron projection development;GO:0014824//artery smooth mus…
ENST00000665646	ENSG00000004468	1.37x10⁻³	SNHG29-245	CD38	GO:0005634//nucleus;GO:0005886//plasma membrane;GO:0009986//cell surface;GO:0016020//membrane;GO:0016021//integral component of membrane;GO:0016323//basolateral plasma membrane;GO:0030667//secretory granule membrane;GO:0043231//intracellular membrane-bounded organelle;GO:0070062//extracellular exosome	GO:0003953//NAD+ nucleosidase activity;GO:0016740//transferase activity;GO:0016787//hydrolase activity;GO:0016798//hydrolase activity, acting on glycosyl bonds;GO:0016849//phosphorus-oxygen lyase activity;GO:0042802//identical protein binding;GO:0050135//NAD(P)+ nucleosidase activity;GO:0061809//NAD+ nucleotidase, cyclic ADP-ribose generating	GO:0001666//response to hypoxia;GO:0007165//signal transduction;GO:0007204//positive regulation of cytosolic calcium ion concentration;GO:0007565//female pregnancy;GO:0008284//positive regulation of cell population proliferation;GO:0009410//response to xenobiotic stimulus;GO:0009725//response to hormone;GO:0010977//negative regulation of neuron projection development;GO:0014824//artery smooth mus…
ENST00000667119	ENSG00000004468	2.03x10⁻³	SNHG15-212	CD38	GO:0005634//nucleus;GO:0005886//plasma membrane;GO:0009986//cell surface;GO:0016020//membrane;GO:0016021//integral component of membrane;GO:0016323//basolateral plasma membrane;GO:0030667//secretory granule membrane;GO:0043231//intracellular membrane-bounded organelle;GO:0070062//extracellular exosome	GO:0003953//NAD+ nucleosidase activity;GO:0016740//transferase activity;GO:0016787//hydrolase activity;GO:0016798//hydrolase activity, acting on glycosyl bonds;GO:0016849//phosphorus-oxygen lyase activity;GO:0042802//identical protein binding;GO:0050135//NAD(P)+ nucleosidase activity;GO:0061809//NAD+ nucleotidase, cyclic ADP-ribose generating	GO:0001666//response to hypoxia;GO:0007165//signal transduction;GO:0007204//positive regulation of cytosolic calcium ion concentration;GO:0007565//female pregnancy;GO:0008284//positive regulation of cell population proliferation;GO:0009410//response to xenobiotic stimulus;GO:0009725//response to hormone;GO:0010977//negative regulation of neuron projection development;GO:0014824//artery smooth mus…
ENST00000678054	ENSG00000004468	2.88x10⁻³	KPNA2-218	CD38	GO:0005634//nucleus;GO:0005886//plasma membrane;GO:0009986//cell surface;GO:0016020//membrane;GO:0016021//integral component of membrane;GO:0016323//basolateral plasma membrane;GO:0030667//secretory granule membrane;GO:0043231//intracellular membrane-bounded organelle;GO:0070062//extracellular exosome	GO:0003953//NAD+ nucleosidase activity;GO:0016740//transferase activity;GO:0016787//hydrolase activity;GO:0016798//hydrolase activity, acting on glycosyl bonds;GO:0016849//phosphorus-oxygen lyase activity;GO:0042802//identical protein binding;GO:0050135//NAD(P)+ nucleosidase activity;GO:0061809//NAD+ nucleotidase, cyclic ADP-ribose generating	GO:0001666//response to hypoxia;GO:0007165//signal transduction;GO:0007204//positive regulation of cytosolic calcium ion concentration;GO:0007565//female pregnancy;GO:0008284//positive regulation of cell population proliferation;GO:0009410//response to xenobiotic stimulus;GO:0009725//response to hormone;GO:0010977//negative regulation of neuron projection development;GO:0014824//artery smooth mus…
MSTRG.14271.16	ENSG00000004468	9.34x10⁻⁴	-	CD38	GO:0005634//nucleus;GO:0005886//plasma membrane;GO:0009986//cell surface;GO:0016020//membrane;GO:0016021//integral component of membrane;GO:0016323//basolateral plasma membrane;GO:0030667//secretory granule membrane;GO:0043231//intracellular membrane-bounded organelle;GO:0070062//extracellular exosome	GO:0003953//NAD+ nucleosidase activity;GO:0016740//transferase activity;GO:0016787//hydrolase activity;GO:0016798//hydrolase activity, acting on glycosyl bonds;GO:0016849//phosphorus-oxygen lyase activity;GO:0042802//identical protein binding;GO:0050135//NAD(P)+ nucleosidase activity;GO:0061809//NAD+ nucleotidase, cyclic ADP-ribose generating	GO:0001666//response to hypoxia;GO:0007165//signal transduction;GO:0007204//positive regulation of cytosolic calcium ion concentration;GO:0007565//female pregnancy;GO:0008284//positive regulation of cell population proliferation;GO:0009410//response to xenobiotic stimulus;GO:0009725//response to hormone;GO:0010977//negative regulation of neuron projection development;GO:0014824//artery smooth mus…
MSTRG.15431.31	ENSG00000004468	1.38x10⁻³	-	CD38	GO:0005634//nucleus;GO:0005886//plasma membrane;GO:0009986//cell surface;GO:0016020//membrane;GO:0016021//integral component of membrane;GO:0016323//basolateral plasma membrane;GO:0030667//secretory granule membrane;GO:0043231//intracellular membrane-bounded organelle;GO:0070062//extracellular exosome	GO:0003953//NAD+ nucleosidase activity;GO:0016740//transferase activity;GO:0016787//hydrolase activity;GO:0016798//hydrolase activity, acting on glycosyl bonds;GO:0016849//phosphorus-oxygen lyase activity;GO:0042802//identical protein binding;GO:0050135//NAD(P)+ nucleosidase activity;GO:0061809//NAD+ nucleotidase, cyclic ADP-ribose generating	GO:0001666//response to hypoxia;GO:0007165//signal transduction;GO:0007204//positive regulation of cytosolic calcium ion concentration;GO:0007565//female pregnancy;GO:0008284//positive regulation of cell population proliferation;GO:0009410//response to xenobiotic stimulus;GO:0009725//response to hormone;GO:0010977//negative regulation of neuron projection development;GO:0014824//artery smooth mus…
MSTRG.18096.17	ENSG00000004468	1.02x10⁻⁴	-	CD38	GO:0005634//nucleus;GO:0005886//plasma membrane;GO:0009986//cell surface;GO:0016020//membrane;GO:0016021//integral component of membrane;GO:0016323//basolateral plasma membrane;GO:0030667//secretory granule membrane;GO:0043231//intracellular membrane-bounded organelle;GO:0070062//extracellular exosome	GO:0003953//NAD+ nucleosidase activity;GO:0016740//transferase activity;GO:0016787//hydrolase activity;GO:0016798//hydrolase activity, acting on glycosyl bonds;GO:0016849//phosphorus-oxygen lyase activity;GO:0042802//identical protein binding;GO:0050135//NAD(P)+ nucleosidase activity;GO:0061809//NAD+ nucleotidase, cyclic ADP-ribose generating	GO:0001666//response to hypoxia;GO:0007165//signal transduction;GO:0007204//positive regulation of cytosolic calcium ion concentration;GO:0007565//female pregnancy;GO:0008284//positive regulation of cell population proliferation;GO:0009410//response to xenobiotic stimulus;GO:0009725//response to hormone;GO:0010977//negative regulation of neuron projection development;GO:0014824//artery smooth mus…
MSTRG.19223.2	ENSG00000004468	6.50x10⁻⁴	-	CD38	GO:0005634//nucleus;GO:0005886//plasma membrane;GO:0009986//cell surface;GO:0016020//membrane;GO:0016021//integral component of membrane;GO:0016323//basolateral plasma membrane;GO:0030667//secretory granule membrane;GO:0043231//intracellular membrane-bounded organelle;GO:0070062//extracellular exosome	GO:0003953//NAD+ nucleosidase activity;GO:0016740//transferase activity;GO:0016787//hydrolase activity;GO:0016798//hydrolase activity, acting on glycosyl bonds;GO:0016849//phosphorus-oxygen lyase activity;GO:0042802//identical protein binding;GO:0050135//NAD(P)+ nucleosidase activity;GO:0061809//NAD+ nucleotidase, cyclic ADP-ribose generating	GO:0001666//response to hypoxia;GO:0007165//signal transduction;GO:0007204//positive regulation of cytosolic calcium ion concentration;GO:0007565//female pregnancy;GO:0008284//positive regulation of cell population proliferation;GO:0009410//response to xenobiotic stimulus;GO:0009725//response to hormone;GO:0010977//negative regulation of neuron projection development;GO:0014824//artery smooth mus…
MSTRG.19223.5	ENSG00000004468	4.86x10⁻⁴	-	CD38	GO:0005634//nucleus;GO:0005886//plasma membrane;GO:0009986//cell surface;GO:0016020//membrane;GO:0016021//integral component of membrane;GO:0016323//basolateral plasma membrane;GO:0030667//secretory granule membrane;GO:0043231//intracellular membrane-bounded organelle;GO:0070062//extracellular exosome	GO:0003953//NAD+ nucleosidase activity;GO:0016740//transferase activity;GO:0016787//hydrolase activity;GO:0016798//hydrolase activity, acting on glycosyl bonds;GO:0016849//phosphorus-oxygen lyase activity;GO:0042802//identical protein binding;GO:0050135//NAD(P)+ nucleosidase activity;GO:0061809//NAD+ nucleotidase, cyclic ADP-ribose generating	GO:0001666//response to hypoxia;GO:0007165//signal transduction;GO:0007204//positive regulation of cytosolic calcium ion concentration;GO:0007565//female pregnancy;GO:0008284//positive regulation of cell population proliferation;GO:0009410//response to xenobiotic stimulus;GO:0009725//response to hormone;GO:0010977//negative regulation of neuron projection development;GO:0014824//artery smooth mus…
MSTRG.19229.3	ENSG00000004468	1.24x10⁻³	-	CD38	GO:0005634//nucleus;GO:0005886//plasma membrane;GO:0009986//cell surface;GO:0016020//membrane;GO:0016021//integral component of membrane;GO:0016323//basolateral plasma membrane;GO:0030667//secretory granule membrane;GO:0043231//intracellular membrane-bounded organelle;GO:0070062//extracellular exosome	GO:0003953//NAD+ nucleosidase activity;GO:0016740//transferase activity;GO:0016787//hydrolase activity;GO:0016798//hydrolase activity, acting on glycosyl bonds;GO:0016849//phosphorus-oxygen lyase activity;GO:0042802//identical protein binding;GO:0050135//NAD(P)+ nucleosidase activity;GO:0061809//NAD+ nucleotidase, cyclic ADP-ribose generating	GO:0001666//response to hypoxia;GO:0007165//signal transduction;GO:0007204//positive regulation of cytosolic calcium ion concentration;GO:0007565//female pregnancy;GO:0008284//positive regulation of cell population proliferation;GO:0009410//response to xenobiotic stimulus;GO:0009725//response to hormone;GO:0010977//negative regulation of neuron projection development;GO:0014824//artery smooth mus…
MSTRG.19288.1	ENSG00000004468	1.83x10⁻³	-	CD38	GO:0005634//nucleus;GO:0005886//plasma membrane;GO:0009986//cell surface;GO:0016020//membrane;GO:0016021//integral component of membrane;GO:0016323//basolateral plasma membrane;GO:0030667//secretory granule membrane;GO:0043231//intracellular membrane-bounded organelle;GO:0070062//extracellular exosome	GO:0003953//NAD+ nucleosidase activity;GO:0016740//transferase activity;GO:0016787//hydrolase activity;GO:0016798//hydrolase activity, acting on glycosyl bonds;GO:0016849//phosphorus-oxygen lyase activity;GO:0042802//identical protein binding;GO:0050135//NAD(P)+ nucleosidase activity;GO:0061809//NAD+ nucleotidase, cyclic ADP-ribose generating	GO:0001666//response to hypoxia;GO:0007165//signal transduction;GO:0007204//positive regulation of cytosolic calcium ion concentration;GO:0007565//female pregnancy;GO:0008284//positive regulation of cell population proliferation;GO:0009410//response to xenobiotic stimulus;GO:0009725//response to hormone;GO:0010977//negative regulation of neuron projection development;GO:0014824//artery smooth mus…
MSTRG.19288.2	ENSG00000004468	2.41x10⁻⁴	-	CD38	GO:0005634//nucleus;GO:0005886//plasma membrane;GO:0009986//cell surface;GO:0016020//membrane;GO:0016021//integral component of membrane;GO:0016323//basolateral plasma membrane;GO:0030667//secretory granule membrane;GO:0043231//intracellular membrane-bounded organelle;GO:0070062//extracellular exosome	GO:0003953//NAD+ nucleosidase activity;GO:0016740//transferase activity;GO:0016787//hydrolase activity;GO:0016798//hydrolase activity, acting on glycosyl bonds;GO:0016849//phosphorus-oxygen lyase activity;GO:0042802//identical protein binding;GO:0050135//NAD(P)+ nucleosidase activity;GO:0061809//NAD+ nucleotidase, cyclic ADP-ribose generating	GO:0001666//response to hypoxia;GO:0007165//signal transduction;GO:0007204//positive regulation of cytosolic calcium ion concentration;GO:0007565//female pregnancy;GO:0008284//positive regulation of cell population proliferation;GO:0009410//response to xenobiotic stimulus;GO:0009725//response to hormone;GO:0010977//negative regulation of neuron projection development;GO:0014824//artery smooth mus…
MSTRG.23072.1	ENSG00000004468	1.76x10⁻³	-	CD38	GO:0005634//nucleus;GO:0005886//plasma membrane;GO:0009986//cell surface;GO:0016020//membrane;GO:0016021//integral component of membrane;GO:0016323//basolateral plasma membrane;GO:0030667//secretory granule membrane;GO:0043231//intracellular membrane-bounded organelle;GO:0070062//extracellular exosome	GO:0003953//NAD+ nucleosidase activity;GO:0016740//transferase activity;GO:0016787//hydrolase activity;GO:0016798//hydrolase activity, acting on glycosyl bonds;GO:0016849//phosphorus-oxygen lyase activity;GO:0042802//identical protein binding;GO:0050135//NAD(P)+ nucleosidase activity;GO:0061809//NAD+ nucleotidase, cyclic ADP-ribose generating	GO:0001666//response to hypoxia;GO:0007165//signal transduction;GO:0007204//positive regulation of cytosolic calcium ion concentration;GO:0007565//female pregnancy;GO:0008284//positive regulation of cell population proliferation;GO:0009410//response to xenobiotic stimulus;GO:0009725//response to hormone;GO:0010977//negative regulation of neuron projection development;GO:0014824//artery smooth mus…
MSTRG.25218.2	ENSG00000004468	2.98x10⁻³	-	CD38	GO:0005634//nucleus;GO:0005886//plasma membrane;GO:0009986//cell surface;GO:0016020//membrane;GO:0016021//integral component of membrane;GO:0016323//basolateral plasma membrane;GO:0030667//secretory granule membrane;GO:0043231//intracellular membrane-bounded organelle;GO:0070062//extracellular exosome	GO:0003953//NAD+ nucleosidase activity;GO:0016740//transferase activity;GO:0016787//hydrolase activity;GO:0016798//hydrolase activity, acting on glycosyl bonds;GO:0016849//phosphorus-oxygen lyase activity;GO:0042802//identical protein binding;GO:0050135//NAD(P)+ nucleosidase activity;GO:0061809//NAD+ nucleotidase, cyclic ADP-ribose generating	GO:0001666//response to hypoxia;GO:0007165//signal transduction;GO:0007204//positive regulation of cytosolic calcium ion concentration;GO:0007565//female pregnancy;GO:0008284//positive regulation of cell population proliferation;GO:0009410//response to xenobiotic stimulus;GO:0009725//response to hormone;GO:0010977//negative regulation of neuron projection development;GO:0014824//artery smooth mus…
MSTRG.25695.1	ENSG00000004468	6.89x10⁻⁴	-	CD38	GO:0005634//nucleus;GO:0005886//plasma membrane;GO:0009986//cell surface;GO:0016020//membrane;GO:0016021//integral component of membrane;GO:0016323//basolateral plasma membrane;GO:0030667//secretory granule membrane;GO:0043231//intracellular membrane-bounded organelle;GO:0070062//extracellular exosome	GO:0003953//NAD+ nucleosidase activity;GO:0016740//transferase activity;GO:0016787//hydrolase activity;GO:0016798//hydrolase activity, acting on glycosyl bonds;GO:0016849//phosphorus-oxygen lyase activity;GO:0042802//identical protein binding;GO:0050135//NAD(P)+ nucleosidase activity;GO:0061809//NAD+ nucleotidase, cyclic ADP-ribose generating	GO:0001666//response to hypoxia;GO:0007165//signal transduction;GO:0007204//positive regulation of cytosolic calcium ion concentration;GO:0007565//female pregnancy;GO:0008284//positive regulation of cell population proliferation;GO:0009410//response to xenobiotic stimulus;GO:0009725//response to hormone;GO:0010977//negative regulation of neuron projection development;GO:0014824//artery smooth mus…
MSTRG.6201.1	ENSG00000004468	9.09x10⁻⁴	-	CD38	GO:0005634//nucleus;GO:0005886//plasma membrane;GO:0009986//cell surface;GO:0016020//membrane;GO:0016021//integral component of membrane;GO:0016323//basolateral plasma membrane;GO:0030667//secretory granule membrane;GO:0043231//intracellular membrane-bounded organelle;GO:0070062//extracellular exosome	GO:0003953//NAD+ nucleosidase activity;GO:0016740//transferase activity;GO:0016787//hydrolase activity;GO:0016798//hydrolase activity, acting on glycosyl bonds;GO:0016849//phosphorus-oxygen lyase activity;GO:0042802//identical protein binding;GO:0050135//NAD(P)+ nucleosidase activity;GO:0061809//NAD+ nucleotidase, cyclic ADP-ribose generating	GO:0001666//response to hypoxia;GO:0007165//signal transduction;GO:0007204//positive regulation of cytosolic calcium ion concentration;GO:0007565//female pregnancy;GO:0008284//positive regulation of cell population proliferation;GO:0009410//response to xenobiotic stimulus;GO:0009725//response to hormone;GO:0010977//negative regulation of neuron projection development;GO:0014824//artery smooth mus…
ENST00000343528	ENSG00000004478	1.26x10⁻³	PDXK-203	FKBP4	GO:0005634//nucleus;GO:0005654//nucleoplasm;GO:0005737//cytoplasm;GO:0005739//mitochondrion;GO:0005829//cytosol;GO:0005856//cytoskeleton;GO:0005874//microtubule;GO:0030424//axon;GO:0032991//protein-containing complex;GO:0042995//cell projection;GO:0043005//neuron projection;GO:0043025//neuronal cell body;GO:0044295//axonal growth cone;GO:0048471//perinuclear region of cytoplasm;GO:0070062//extrac…	GO:0003723//RNA binding;GO:0003755//peptidyl-prolyl cis-trans isomerase activity;GO:0005515//protein binding;GO:0005524//ATP binding;GO:0005525//GTP binding;GO:0005528//FK506 binding;GO:0016853//isomerase activity;GO:0030674//protein-macromolecule adaptor activity;GO:0031072//heat shock protein binding;GO:0032767//copper-dependent protein binding;GO:0035259//glucocorticoid receptor binding;GO:004…	GO:0000413//protein peptidyl-prolyl isomerization;GO:0006457//protein folding;GO:0006463//steroid hormone receptor complex assembly;GO:0006825//copper ion transport;GO:0007566//embryo implantation;GO:0010977//negative regulation of neuron projection development;GO:0030521//androgen receptor signaling pathway;GO:0030850//prostate gland development;GO:0031111//negative regulation of microtubule pol…
ENST00000391874	ENSG00000004478	3.15x10⁻⁵	ENAH-205	FKBP4	GO:0005634//nucleus;GO:0005654//nucleoplasm;GO:0005737//cytoplasm;GO:0005739//mitochondrion;GO:0005829//cytosol;GO:0005856//cytoskeleton;GO:0005874//microtubule;GO:0030424//axon;GO:0032991//protein-containing complex;GO:0042995//cell projection;GO:0043005//neuron projection;GO:0043025//neuronal cell body;GO:0044295//axonal growth cone;GO:0048471//perinuclear region of cytoplasm;GO:0070062//extrac…	GO:0003723//RNA binding;GO:0003755//peptidyl-prolyl cis-trans isomerase activity;GO:0005515//protein binding;GO:0005524//ATP binding;GO:0005525//GTP binding;GO:0005528//FK506 binding;GO:0016853//isomerase activity;GO:0030674//protein-macromolecule adaptor activity;GO:0031072//heat shock protein binding;GO:0032767//copper-dependent protein binding;GO:0035259//glucocorticoid receptor binding;GO:004…	GO:0000413//protein peptidyl-prolyl isomerization;GO:0006457//protein folding;GO:0006463//steroid hormone receptor complex assembly;GO:0006825//copper ion transport;GO:0007566//embryo implantation;GO:0010977//negative regulation of neuron projection development;GO:0030521//androgen receptor signaling pathway;GO:0030850//prostate gland development;GO:0031111//negative regulation of microtubule pol…
ENST00000424684	ENSG00000004478	1.06x10⁻³	LINC02591-201	FKBP4	GO:0005634//nucleus;GO:0005654//nucleoplasm;GO:0005737//cytoplasm;GO:0005739//mitochondrion;GO:0005829//cytosol;GO:0005856//cytoskeleton;GO:0005874//microtubule;GO:0030424//axon;GO:0032991//protein-containing complex;GO:0042995//cell projection;GO:0043005//neuron projection;GO:0043025//neuronal cell body;GO:0044295//axonal growth cone;GO:0048471//perinuclear region of cytoplasm;GO:0070062//extrac…	GO:0003723//RNA binding;GO:0003755//peptidyl-prolyl cis-trans isomerase activity;GO:0005515//protein binding;GO:0005524//ATP binding;GO:0005525//GTP binding;GO:0005528//FK506 binding;GO:0016853//isomerase activity;GO:0030674//protein-macromolecule adaptor activity;GO:0031072//heat shock protein binding;GO:0032767//copper-dependent protein binding;GO:0035259//glucocorticoid receptor binding;GO:004…	GO:0000413//protein peptidyl-prolyl isomerization;GO:0006457//protein folding;GO:0006463//steroid hormone receptor complex assembly;GO:0006825//copper ion transport;GO:0007566//embryo implantation;GO:0010977//negative regulation of neuron projection development;GO:0030521//androgen receptor signaling pathway;GO:0030850//prostate gland development;GO:0031111//negative regulation of microtubule pol…
ENST00000455909	ENSG00000004478	2.89x10⁻³	FKBP9P1-202	FKBP4	GO:0005634//nucleus;GO:0005654//nucleoplasm;GO:0005737//cytoplasm;GO:0005739//mitochondrion;GO:0005829//cytosol;GO:0005856//cytoskeleton;GO:0005874//microtubule;GO:0030424//axon;GO:0032991//protein-containing complex;GO:0042995//cell projection;GO:0043005//neuron projection;GO:0043025//neuronal cell body;GO:0044295//axonal growth cone;GO:0048471//perinuclear region of cytoplasm;GO:0070062//extrac…	GO:0003723//RNA binding;GO:0003755//peptidyl-prolyl cis-trans isomerase activity;GO:0005515//protein binding;GO:0005524//ATP binding;GO:0005525//GTP binding;GO:0005528//FK506 binding;GO:0016853//isomerase activity;GO:0030674//protein-macromolecule adaptor activity;GO:0031072//heat shock protein binding;GO:0032767//copper-dependent protein binding;GO:0035259//glucocorticoid receptor binding;GO:004…	GO:0000413//protein peptidyl-prolyl isomerization;GO:0006457//protein folding;GO:0006463//steroid hormone receptor complex assembly;GO:0006825//copper ion transport;GO:0007566//embryo implantation;GO:0010977//negative regulation of neuron projection development;GO:0030521//androgen receptor signaling pathway;GO:0030850//prostate gland development;GO:0031111//negative regulation of microtubule pol…
ENST00000466496	ENSG00000004478	6.10x10⁻⁴	MTMR11-203	FKBP4	GO:0005634//nucleus;GO:0005654//nucleoplasm;GO:0005737//cytoplasm;GO:0005739//mitochondrion;GO:0005829//cytosol;GO:0005856//cytoskeleton;GO:0005874//microtubule;GO:0030424//axon;GO:0032991//protein-containing complex;GO:0042995//cell projection;GO:0043005//neuron projection;GO:0043025//neuronal cell body;GO:0044295//axonal growth cone;GO:0048471//perinuclear region of cytoplasm;GO:0070062//extrac…	GO:0003723//RNA binding;GO:0003755//peptidyl-prolyl cis-trans isomerase activity;GO:0005515//protein binding;GO:0005524//ATP binding;GO:0005525//GTP binding;GO:0005528//FK506 binding;GO:0016853//isomerase activity;GO:0030674//protein-macromolecule adaptor activity;GO:0031072//heat shock protein binding;GO:0032767//copper-dependent protein binding;GO:0035259//glucocorticoid receptor binding;GO:004…	GO:0000413//protein peptidyl-prolyl isomerization;GO:0006457//protein folding;GO:0006463//steroid hormone receptor complex assembly;GO:0006825//copper ion transport;GO:0007566//embryo implantation;GO:0010977//negative regulation of neuron projection development;GO:0030521//androgen receptor signaling pathway;GO:0030850//prostate gland development;GO:0031111//negative regulation of microtubule pol…
ENST00000477661	ENSG00000004478	3.21x10⁻⁴	AKR1C1-205	FKBP4	GO:0005634//nucleus;GO:0005654//nucleoplasm;GO:0005737//cytoplasm;GO:0005739//mitochondrion;GO:0005829//cytosol;GO:0005856//cytoskeleton;GO:0005874//microtubule;GO:0030424//axon;GO:0032991//protein-containing complex;GO:0042995//cell projection;GO:0043005//neuron projection;GO:0043025//neuronal cell body;GO:0044295//axonal growth cone;GO:0048471//perinuclear region of cytoplasm;GO:0070062//extrac…	GO:0003723//RNA binding;GO:0003755//peptidyl-prolyl cis-trans isomerase activity;GO:0005515//protein binding;GO:0005524//ATP binding;GO:0005525//GTP binding;GO:0005528//FK506 binding;GO:0016853//isomerase activity;GO:0030674//protein-macromolecule adaptor activity;GO:0031072//heat shock protein binding;GO:0032767//copper-dependent protein binding;GO:0035259//glucocorticoid receptor binding;GO:004…	GO:0000413//protein peptidyl-prolyl isomerization;GO:0006457//protein folding;GO:0006463//steroid hormone receptor complex assembly;GO:0006825//copper ion transport;GO:0007566//embryo implantation;GO:0010977//negative regulation of neuron projection development;GO:0030521//androgen receptor signaling pathway;GO:0030850//prostate gland development;GO:0031111//negative regulation of microtubule pol…
ENST00000478651	ENSG00000004478	1.69x10⁻³	SLCO2A1-205	FKBP4	GO:0005634//nucleus;GO:0005654//nucleoplasm;GO:0005737//cytoplasm;GO:0005739//mitochondrion;GO:0005829//cytosol;GO:0005856//cytoskeleton;GO:0005874//microtubule;GO:0030424//axon;GO:0032991//protein-containing complex;GO:0042995//cell projection;GO:0043005//neuron projection;GO:0043025//neuronal cell body;GO:0044295//axonal growth cone;GO:0048471//perinuclear region of cytoplasm;GO:0070062//extrac…	GO:0003723//RNA binding;GO:0003755//peptidyl-prolyl cis-trans isomerase activity;GO:0005515//protein binding;GO:0005524//ATP binding;GO:0005525//GTP binding;GO:0005528//FK506 binding;GO:0016853//isomerase activity;GO:0030674//protein-macromolecule adaptor activity;GO:0031072//heat shock protein binding;GO:0032767//copper-dependent protein binding;GO:0035259//glucocorticoid receptor binding;GO:004…	GO:0000413//protein peptidyl-prolyl isomerization;GO:0006457//protein folding;GO:0006463//steroid hormone receptor complex assembly;GO:0006825//copper ion transport;GO:0007566//embryo implantation;GO:0010977//negative regulation of neuron projection development;GO:0030521//androgen receptor signaling pathway;GO:0030850//prostate gland development;GO:0031111//negative regulation of microtubule pol…
ENST00000478845	ENSG00000004478	3.18x10⁻³	THBS1-IT1-201	FKBP4	GO:0005634//nucleus;GO:0005654//nucleoplasm;GO:0005737//cytoplasm;GO:0005739//mitochondrion;GO:0005829//cytosol;GO:0005856//cytoskeleton;GO:0005874//microtubule;GO:0030424//axon;GO:0032991//protein-containing complex;GO:0042995//cell projection;GO:0043005//neuron projection;GO:0043025//neuronal cell body;GO:0044295//axonal growth cone;GO:0048471//perinuclear region of cytoplasm;GO:0070062//extrac…	GO:0003723//RNA binding;GO:0003755//peptidyl-prolyl cis-trans isomerase activity;GO:0005515//protein binding;GO:0005524//ATP binding;GO:0005525//GTP binding;GO:0005528//FK506 binding;GO:0016853//isomerase activity;GO:0030674//protein-macromolecule adaptor activity;GO:0031072//heat shock protein binding;GO:0032767//copper-dependent protein binding;GO:0035259//glucocorticoid receptor binding;GO:004…	GO:0000413//protein peptidyl-prolyl isomerization;GO:0006457//protein folding;GO:0006463//steroid hormone receptor complex assembly;GO:0006825//copper ion transport;GO:0007566//embryo implantation;GO:0010977//negative regulation of neuron projection development;GO:0030521//androgen receptor signaling pathway;GO:0030850//prostate gland development;GO:0031111//negative regulation of microtubule pol…
ENST00000480992	ENSG00000004478	1.90x10⁻³	NOP56-213	FKBP4	GO:0005634//nucleus;GO:0005654//nucleoplasm;GO:0005737//cytoplasm;GO:0005739//mitochondrion;GO:0005829//cytosol;GO:0005856//cytoskeleton;GO:0005874//microtubule;GO:0030424//axon;GO:0032991//protein-containing complex;GO:0042995//cell projection;GO:0043005//neuron projection;GO:0043025//neuronal cell body;GO:0044295//axonal growth cone;GO:0048471//perinuclear region of cytoplasm;GO:0070062//extrac…	GO:0003723//RNA binding;GO:0003755//peptidyl-prolyl cis-trans isomerase activity;GO:0005515//protein binding;GO:0005524//ATP binding;GO:0005525//GTP binding;GO:0005528//FK506 binding;GO:0016853//isomerase activity;GO:0030674//protein-macromolecule adaptor activity;GO:0031072//heat shock protein binding;GO:0032767//copper-dependent protein binding;GO:0035259//glucocorticoid receptor binding;GO:004…	GO:0000413//protein peptidyl-prolyl isomerization;GO:0006457//protein folding;GO:0006463//steroid hormone receptor complex assembly;GO:0006825//copper ion transport;GO:0007566//embryo implantation;GO:0010977//negative regulation of neuron projection development;GO:0030521//androgen receptor signaling pathway;GO:0030850//prostate gland development;GO:0031111//negative regulation of microtubule pol…
[truncated: 101,338 more rows]
